# Supplementary material for: Evaluating the Cost-Utility of Continuous Glucose Monitoring in Individuals with Type 1 Diabetes: A Systematic Review of the Methods and Quality of Studies Using Decision Models or Empirical Data
Source: PubMed Central journal article supplement — Pharmacoeconomics. 2024 Jun 21;42(9):929–53. doi: 10.1007/s40273-024-01388-6 (PMC11343921; doi:10.1007/s40273-024-01388-6), 2024-06-21
Supplement: 40273_2024_1388_MOESM4_ESM.pdf [file 40273_2024_1388_MOESM4_ESM.pdf]

## Supplementary Information – Online Resource 4

Evaluating cost-utility of continuous glucose monitoring in individuals with type 1 diabetes: a systematic review of methods and quality of studies using decision models and/or empirical data.

de Jong LA<sup>1\*</sup> (ORCID ID: 0000-0001-8814-0670), Li X<sup>2</sup> (ORCID ID: 0000-0002-0225-6937), Emamipour S<sup>3</sup>, van der Werf S<sup>4</sup> (ORCID ID: 0000-0001-5856-7657), Postma MJ<sup>1,5</sup>, van Dijk PR<sup>6</sup> (ORCID ID: 0000-0002-9702-6551), Feenstra TL<sup>2</sup> (ORCID ID: 0000-0002-5788-0454)

<sup>1</sup> Department of Health Sciences, University Medical Center Groningen, University of Groningen, Groningen, the Netherlands

<sup>2</sup> Unit of Pharmacotherapy, -Epidemiology & -Economics, University of Groningen, Groningen Research Institute of Pharmacy (GRIP), Groningen, the Netherlands

<sup>3</sup> Department of Clinical Pharmacy and Pharmacology, University Medical Center Groningen, University of Groningen, Groningen, the Netherlands

<sup>4</sup> Central Medical Library, University Medical Center Groningen, University of Groningen, Groningen, the Netherlands

<sup>5</sup> Department of Economics, Econometrics and Finance, Faculty of Economics & Business, University of Groningen, Groningen, the Netherlands

<sup>6</sup> Department of Endocrinology. University Medical Center Groningen, University of Groningen, Groningen, The Netherlands

\*Corresponding author: [t.l.feenstra@rug.nl](mailto:t.l.feenstra@rug.nl)

**Table 1. Utility instruments used in the included studies.** Summary of cost-effectiveness outcomes

| Publication (author year, country)  | Cohort/Scenario                            | Original currency and price year | Incremental costs (2022 US\$) | Incremental QALYs | ICER (cost per QALY; 2022 US\$) |
|-------------------------------------|--------------------------------------------|----------------------------------|-------------------------------|-------------------|---------------------------------|
| Emamipour 2022, The Netherlands [1] | -                                          | EUR 2016                         | -\$2,192                      | 0.030             | Dominant                        |
| Huang 2010, US [30]                 | Within-trial, HbA1c $\geq$ 7.0%            | USD 2008 <sup>b</sup>            | NR                            | NR                | \$600,288                       |
|                                     | Within-trial, HbA1c < 7.0%                 |                                  | NR                            | NR                | \$554,248                       |
|                                     | Long-term, HbA1c $\geq$ 7.0%               |                                  | \$79,803                      | 0.600             | \$134,002                       |
|                                     | Long-term, HbA1c < 7.0%                    |                                  | \$118,666                     | 1.110             | \$118,666                       |
| Ly 2014, Australia [2]              | -                                          | AUD 2013                         | \$1,320                       | 0.037             | \$15,456                        |
| Wan 2018, US [3]                    | Within-trial analysis                      | USD 2015                         | \$3,151                       | NR                | NR                              |
|                                     | Long-term analysis                         |                                  | \$68,114                      | 0.540             | \$121,043                       |
| Bilir 2018, Sweden [4]              | -                                          | SEK 2016                         | \$32,685                      | 0.801             | \$40,790                        |
| Chaugule 2017, Canada [5]           | -                                          | CAD 2016                         | \$111,236                     | 3.354             | \$33,163                        |
| Conget 2018, Spain [6]              | NHS perspective                            | EUR 2016                         | \$92,466                      | 1.880             | \$49,262                        |
|                                     | Societal perspective                       |                                  | \$79,606                      | 1.880             | \$42,410                        |
| Gomez 2016, Colombia [7]            | -                                          | USD 2014                         | \$110,286                     | 3.810             | \$28,899                        |
| Isitt 2022, Australia [8]           | rt-CGM vs SMBG                             | AUD 2020 <sup>a</sup>            | \$16,921                      | 1.199             | \$14,119                        |
|                                     | rt-CGM vs isCGM                            |                                  | \$8,669                       | 0.569             | \$15,243                        |
| Jendle 2017, Sweden [9]             | Cohort with increased risk of hypoglycemia | SEK 2015                         | \$37,131                      | 1.877             | \$19,782                        |
|                                     | Cohort with uncontrolled HbA1c at baseline |                                  | \$38,052                      | 1.067             | \$35,646                        |
| Jendle 2019, Sweden [10]            | -                                          | SEK 2018                         | \$42,039                      | 1.900             | \$22,161                        |
| Jendle 2021, Sweden [11]            | -                                          | SEK 2019 <sup>c</sup>            | \$96,415                      | 1.950             | \$49,532                        |
| Kamble 2012, US [12]                | SAPT with 3-d sensor                       | USD 2010                         | \$115,842                     | 0.376             | \$308,210                       |
|                                     | SAPT with 6-d sensor                       |                                  | \$84,786                      | 0.376             | \$225,586                       |
| Lambadiari 2022, Greece [13]        | vs SAP + PLGM                              | EUR 2015                         | -\$22,853                     | 0.284             | Dominant                        |
|                                     | vs MDI + isCGM                             |                                  | \$179,383                     | 2.708             | \$66,246                        |
| Nicolucci 2018, Italy [14]          | Cohort at increased risk of hypoglycemia   | EUR 2014                         | \$119,372                     | 1.877             | \$63,597                        |
|                                     | Cohort with uncontrolled HbA1c             |                                  | \$122,957                     | 1.448             | \$84,908                        |
| Riemsma 2016, UK [15]               | vs MDI + SMBG                              | GBP 2014                         | \$138,844                     | 0.664             | \$209,197                       |
|                                     | vs CSII + SMBG                             |                                  | \$86,151                      | 0.083             | \$1,039,211                     |
| Roze 2015, Sweden [16]              | -                                          | SEK 2011                         | \$39,894                      | 0.760             | \$52,378                        |

|                                                 |                                                                                                    |          |           |       |             |
|-------------------------------------------------|----------------------------------------------------------------------------------------------------|----------|-----------|-------|-------------|
| <b>Roze 2016, France [17]</b>                   | Cohort with an elevated risk for hypoglycemia due to impaired awareness of hypoglycemia            | EUR 2014 | \$57,278  | 1.187 | \$48,258    |
|                                                 | Cohort with uncontrolled HbA1c                                                                     |          | \$50,530  | 1.435 | \$35,206    |
| <b>Roze 2016, UK [18]</b>                       | -                                                                                                  | GBP 2013 | \$64,111  | 2.990 | \$21,447    |
| <b>Roze 2017, Denmark [19]</b>                  | Cohort with hyperglycemia at baseline                                                              | DKK 2015 | \$41,386  | 1.450 | \$28,580    |
|                                                 | Cohort with an increased risk for hypoglycemia                                                     |          | \$30,887  | 1.880 | \$16,455    |
| <b>Roze 2019, The Netherlands [20]</b>          | Cohort with hyperglycemia at baseline                                                              | EUR 2014 | \$68,922  | 1.770 | \$38,965    |
|                                                 | Cohort with an increased risk for hypoglycemia                                                     |          | \$57,563  | 2.160 | \$26,604    |
| <b>Roze 2019, Turkey [21]</b>                   | Cohort with poor glycemic control at baseline                                                      | TRY 2016 | \$80,866  | 1.403 | \$57,638    |
|                                                 | Cohort at increased risk for hypoglycemia                                                          |          | \$90,216  | 1.733 | \$52,069    |
| <b>Roze 2020, UK [22]</b>                       | Cohort reflecting the DIAMOND trial T1D population                                                 | GBP 2018 | \$23,100  | 1.490 | \$15,512    |
|                                                 | Cohort reflecting the DIAMOND trial T1D population with baseline HbA1c at least 8.5% (69 mmol/mol) |          | \$21,383  | 1.390 | \$15,382    |
| <b>Roze 2021, Canada [23]</b>                   | -                                                                                                  | CAD 2019 | \$32,762  | 2.088 | \$15,690    |
| <b>Roze 2021, UK [24]</b>                       | -                                                                                                  | GBP 2018 | \$57,491  | 1.730 | \$33,141    |
| <b>Roze 2021, France [25]</b>                   | -                                                                                                  | EUR 2020 | \$32,198  | 1.380 | \$23,339    |
| <b>Serné 2022, The Netherlands [26]</b>         | -                                                                                                  | EUR 2020 | \$22,082  | 2.230 | \$9,898     |
| <b>Zhao 2021, China [27]</b>                    | RCT scenario                                                                                       | CNY 2021 | \$14,505  | 1.220 | \$1,524     |
|                                                 | RWE scenario                                                                                       |          | -\$430    | 1.320 | Dominant    |
| <b>Garcia-Lorenzo 2018, Spain [28]</b>          | -                                                                                                  | EUR 2017 | \$224,678 | 0.046 | \$4,858,767 |
| <b>Health Quality Ontario 2018, Canada [29]</b> | CGM + MDI vs SMBG + MDI                                                                            | CAD 2017 | \$100,300 | 0.094 | \$1,071,144 |
|                                                 | SAP vs SMBG + MDI                                                                                  |          | \$128,211 | 0.132 | \$973,669   |
|                                                 | CGM + insulin pump vs SMBG + insulin pump                                                          |          | \$77,888  | 0.104 | \$752,234   |
|                                                 | SAP vs SMBG + insulin pump                                                                         |          | \$78,299  | 0.137 | \$572,088   |
| <b>McQueen 2011, US [31]</b>                    | -                                                                                                  | USD 2007 | \$33,198  | 0.523 | \$63,477    |
| <b>Pease 2020, Australia [32]</b>               | -                                                                                                  | AUD 2019 | \$105,672 | 3.724 | \$29,828    |
| <b>Pease 2022, Australia [33]</b>               | -                                                                                                  | AUD 2021 | \$28,803  | 1.150 | \$24,966    |
| <b>Rotondi 2022, Canada [34]</b>                | CGM vs SMBG                                                                                        | CAD 2021 | NR        | NR    | \$31,165    |
|                                                 | isCGM vs SMBG                                                                                      |          | NR        | NR    | \$15,564    |

<sup>a</sup> NR; assumed price level two years before publication year.

<sup>b</sup> NR; assumed the same price level as the year the trial was published.

<sup>c</sup> NR; assumed the same price level for all costs as for the productivity losses.

Abbreviations: AUD, Australian dollars; CAD, Canadian dollars; CGM, continuous glucose monitoring; CNY, Chinese Yen; DKK, Danish Krone; EUR, euros; GBP, Great British pound; isCGM, intermittently-scanned continuous glucose monitoring; MDI, multiple daily injections; NR, not reported; RCT, randomized-controlled trial; SAP, sensor-augmented pump; SEK, Swedish krona; SMBG, self-monitoring of blood glucose; TRY, Turkish lira; T1D, type 1 diabetes; UK, United Kingdom; US, United States.

## References

1. Emamipour S, van Dijk PR, Bilo HJG, Edens MA, van der Galiën O, Postma MJ, et al. Personalizing the Use of a Intermittently Scanned Continuous Glucose Monitoring (isCGM) Device in Individuals With Type 1 Diabetes: A Cost-Effectiveness Perspective in the Netherlands (FLARE-NL 9). *J Diabetes Sci Technol*. 2022.
2. Ly TT, Brnabic AJM, Eggleston A, Kolivos A, McBride ME, Schrover R, et al. A cost-effectiveness analysis of sensor-augmented insulin pump therapy and automated insulin suspension versus standard pump therapy for hypoglycemic unaware patients with type 1 diabetes. *Value Health*. 2014;17(5):561–9.
3. Wan W, Skandari MR, Minc A, Nathan AG, Winn A, Zarei P, et al. Cost-effectiveness of Continuous Glucose Monitoring for Adults With Type 1 Diabetes Compared With Self-Monitoring of Blood Glucose: The DIAMOND Randomized Trial. *Diabetes Care*. 2018 Jun 1;41(6):1227–34.
4. Bilir SP, Hellmund R, Wehler B, Li H, Munakata J, Lamotte M. Cost-effectiveness Analysis of a Flash Glucose Monitoring System for Patients with Type 1 Diabetes Receiving Intensive Insulin Treatment in Sweden. *Eur Endocrinol*. 2018 Sep 1;14(2):73–9.
5. Chaugule S, Graham C. Cost-effectiveness of G5 Mobile continuous glucose monitoring device compared to self-monitoring of blood glucose alone for people with type 1 diabetes from the Canadian societal perspective. *J Med Econ*. 2017 Nov 2;20(11):1128–35.
6. Conget I, Martín-Vaquero P, Roze S, Elías I, Pineda C, Álvarez M, et al. Cost-effectiveness analysis of sensor-augmented pump therapy with low glucose-suspend in patients with type 1 diabetes mellitus and high risk of hypoglycemia in Spain. *Endocrinol Diabetes Nutr*. 2018 Aug 1;65(7):380–6.
7. Gomez AM, Alfonso-Cristancho R, Orozco JJ, Lynch PM, Prieto D, Saunders R, et al. Clinical and economic benefits of integrated pump/CGM technology therapy in patients with type 1 diabetes in Colombia. *Endocrinol Nutr*. 2016 Nov 1;63(9):466–74.
8. Isitt JJ, Roze S. Long-term cost-effectiveness of Dexcom G6 real-time continuous glucose monitoring system in people with type 1 diabetes in Australia: Response to letter from Hellmund, Richard and Welsh, Zoe. *Diabet Med*. 2023 Feb 1;40(2).
9. Jendle J, Smith-Palmer J, Delbaere A, de Portu S, Papo N, Valentine W, et al. Cost-Effectiveness Analysis of Sensor-Augmented Insulin Pump Therapy with Automated Insulin Suspension Versus Standard Insulin Pump Therapy in Patients with Type 1 Diabetes in Sweden. *Diabetes Ther*. 2017 Oct 1;8(5):1015–30.
10. Jendle J, Pöhlmann J, De Portu S, Smith-Palmer J, Roze S. Cost-Effectiveness Analysis of the MiniMed 670G Hybrid Closed-Loop System Versus Continuous Subcutaneous Insulin Infusion for Treatment of Type 1 Diabetes. *Diabetes Technol Ther*. 2019 Mar 1;21(3):110–8.
11. Jendle J, Buompiersiere MI, Holm AL, de Portu S, Malkin SJP, Cohen O. The Cost-Effectiveness of an Advanced Hybrid Closed-Loop System in People with Type 1 Diabetes: a Health Economic Analysis in Sweden. *Diabetes Ther*. 2021 Nov 1;12(11):2977–91.
12. Kamble S, Schulman KA, Reed SD. Cost-effectiveness of sensor-augmented pump therapy in adults with type 1 diabetes in the United States. *Value Health*. 2012 Jul;15(5):632–8.
13. Lambadiari V, Ozdemir Saltik AZ, De Portu S, Buompiersiere MI, Kountouri A, Korakas E, et al. Cost-Effectiveness Analysis of an Advanced Hybrid Closed-Loop Insulin Delivery System in People with Type 1 Diabetes in Greece. *Diabetes Technol Ther*. 2022 May 1;24(5):316–23.

14. Nicolucci A, Rossi MC, D'Ostilio D, Delbaere A, de Portu S, Roze S. Cost-effectiveness of sensor-augmented pump therapy in two different patient populations with type 1 diabetes in Italy. *Nutr Metab Cardiovasc Dis*. 2018 Jul 1;28(7):707–15.
15. Riemsma R, Ramos IC, Birnie R, Büyükkaramikli N, Armstrong N, Ryder S, et al. Integrated sensor-augmented pump therapy systems [the MiniMed® Paradigm™ Veo system and the Vibe™ and G4® PLATINUM CGM (continuous glucose monitoring) system] for managing blood glucose levels in type 1 diabetes: a systematic review and economic evaluation. *Health Technol Assess*. 2016 Feb 1;20(17):1–252.
16. Roze S, Saunders R, Brandt AS, de Portu S, Papo NL, Jendle J. Health-economic analysis of real-time continuous glucose monitoring in people with Type 1 diabetes. *Diabet Med*. 2015 May 1;32(5):618–26.
17. Roze S, Smith-Palmer J, Valentine W, Payet V, De Portu S, Papo N, et al. Cost-Effectiveness of Sensor-Augmented Pump Therapy with Low Glucose Suspend Versus Standard Insulin Pump Therapy in Two Different Patient Populations with Type 1 Diabetes in France. *Diabetes Technol Ther*. 2016 Feb 1;18(2):75–84.
18. Roze S, Smith-Palmer J, Valentine WJ, Cook M, Jethwa M, De Portu S, et al. Long-term health economic benefits of sensor-augmented pump therapy vs continuous subcutaneous insulin infusion alone in type 1 diabetes: a U.K. perspective. *J Med Econ*. 2016 Mar 3;19(3):236–42.
19. Roze S, de Portu S, Smith-Palmer J, Delbaere A, Valentine W, Ridderstråle M. Cost-effectiveness of sensor-augmented pump therapy versus standard insulin pump therapy in patients with type 1 diabetes in Denmark. *Diabetes Res Clin Pract*. 2017 Jun 1;128:6–14.
20. Roze S, Smith-Palmer J, De Portu S, Delbaere A, De Brouwer B, De Valk HW. Cost-effectiveness of sensor-augmented insulin pump therapy vs continuous subcutaneous insulin infusion in patients with type 1 diabetes in the Netherlands. *Clinicoecon Outcomes Res*. 2019;11:73–82.
21. Roze S, Smith-Palmer J, De Portu S, Özdemir Saltik AZ, Akgül T, Deyneli O. Cost-Effectiveness of Sensor-Augmented Insulin Pump Therapy Versus Continuous Insulin Infusion in Patients with Type 1 Diabetes in Turkey. *Diabetes Technol Ther*. 2019 Dec 1;21(12):727–35.
22. Roze S, Isitt J, Smith-Palmer J, Javanbakht M, Lynch P. Long-term Cost-Effectiveness of Dexcom G6 Real-time Continuous Glucose Monitoring Versus Self-Monitoring of Blood Glucose in Patients With Type 1 Diabetes in the U.K. *Diabetes Care*. 2020 Oct 1;43(10):2411–7.
23. Roze S, Isitt JJ, Smith-Palmer J, Lynch P. Evaluation of the Long-Term Cost-Effectiveness of the Dexcom G6 Continuous Glucose Monitor versus Self-Monitoring of Blood Glucose in People with Type 1 Diabetes in Canada. *Clinicoecon Outcomes Res*. 2021;13:717–25.
24. Roze S, Buompiersiere MI, Ozdemir Z, de Portu S, Cohen O. Cost-effectiveness of a novel hybrid closed-loop system compared with continuous subcutaneous insulin infusion in people with type 1 diabetes in the UK. *J Med Econ*. 2021;24(1):883–90.
25. Roze S, Isitt JJ, Smith-Palmer J, Lynch P, Klinkenbijl B, Zammit G, et al. Long-Term Cost-Effectiveness the Dexcom G6 Real-Time Continuous Glucose Monitoring System Compared with Self-Monitoring of Blood Glucose in People with Type 1 Diabetes in France. *Diabetes Ther*. 2021 Jan 1;12(1):235–46.
26. Serné EH, Roze S, Buompiersiere MI, Valentine WJ, De Portu S, de Valk HW. Cost-Effectiveness of Hybrid Closed Loop Insulin Pumps Versus Multiple Daily Injections Plus Intermittently Scanned Glucose Monitoring in People With Type 1 Diabetes in The Netherlands. *Adv Ther*. 2022 Apr 1;39(4):1844–56.
27. Zhao X, Ming J, Qu S, Li HJ, Wu J, Ji L, et al. Cost-Effectiveness of Flash Glucose Monitoring for the Management of Patients with Type 1 and Patients with Type 2 Diabetes in China. *Diabetes Ther*. 2021 Dec 1;12(12):3079–92.
28. García-Lorenzo B, Rivero-Santana A, Vallejo-Torres L, Castilla-Rodríguez I, García-Pérez S, García-Pérez L, et al. Cost-effectiveness analysis of real-time continuous monitoring glucose compared to self-monitoring of blood glucose for diabetes mellitus in Spain. *J Eval Clin Pract*. 2018 Aug 1;24(4):772–81.
29. Continuous Monitoring of Glucose for Type 1 Diabetes: A Health Technology Assessment. Ontario; 2018 Feb.
30. Huang ES, O'Grady M, Basu A, Winn A, John P, Lee J, et al. The cost-effectiveness of continuous glucose monitoring in type 1 diabetes. *Diabetes Care*. 2010 Jun;33(6):1269–74.

31. McQueen RB, Ellis SL, Campbell JD, Nair K V., Sullivan PW. Cost-effectiveness of continuous glucose monitoring and intensive insulin therapy for type 1 diabetes. *Cost Eff Resour Alloc.* 2011 Sep 14;9.
32. Pease A, Zomer E, Liew D, Earnest A, Soldatos G, Ademi Z, et al. Cost-Effectiveness Analysis of a Hybrid Closed-Loop System Versus Multiple Daily Injections and Capillary Glucose Testing for Adults with Type 1 Diabetes. *Diabetes Technol Ther.* 2020 Nov 1;22(11):812–21.
33. Pease A, Callander E, Zomer E, Abraham MB, Davis EA, Jones TW, et al. The Cost of Control: Cost-effectiveness Analysis of Hybrid Closed-Loop Therapy in Youth. *Diabetes Care.* 2022 Sep 1;45(9):1971–80.
34. Rotondi MA, Wong O, Riddell M, Perkins B. Population-Level Impact and Cost-effectiveness of Continuous Glucose Monitoring and Intermittently Scanned Continuous Glucose;45(9):2012–9.
