# Supplementary material for: Evaluating the Cost-Utility of Continuous Glucose Monitoring in Individuals with Type 1 Diabetes: A Systematic Review of the Methods and Quality of Studies Using Decision Models or Empirical Data
Source: PubMed Central journal article supplement — Pharmacoeconomics. 2024 Jun 21;42(9):929–53. doi: 10.1007/s40273-024-01388-6 (PMC11343921; doi:10.1007/s40273-024-01388-6), 2024-06-21
Supplement: 40273_2024_1388_MOESM5_ESM.pdf [file 40273_2024_1388_MOESM5_ESM.pdf]

## Supplementary Information – Online Resource 5

Evaluating cost-utility of continuous glucose monitoring in individuals with type 1 diabetes: a systematic review of methods and quality of studies using decision models and/or empirical data.

de Jong LA<sup>1\*</sup> (ORCID ID: 0000-0001-8814-0670), Li X<sup>2</sup> (ORCID ID: 0000-0002-0225-6937), Emamipour S<sup>3</sup>, van der Werf S<sup>4</sup> (ORCID ID: 0000-0001-5856-7657), Postma MJ<sup>1,5</sup>, van Dijk PR<sup>6</sup> (ORCID ID: 0000-0002-9702-6551), Feenstra TL<sup>2</sup> (ORCID ID: 0000-0002-5788-0454)

<sup>1</sup> Department of Health Sciences, University Medical Center Groningen, University of Groningen, Groningen, the Netherlands

<sup>2</sup> Unit of Pharmacotherapy, -Epidemiology & -Economics, University of Groningen, Groningen Research Institute of Pharmacy (GRIP), Groningen, the Netherlands

<sup>3</sup> Department of Clinical Pharmacy and Pharmacology, University Medical Center Groningen, University of Groningen, Groningen, the Netherlands

<sup>4</sup> Central Medical Library, University Medical Center Groningen, University of Groningen, Groningen, the Netherlands

<sup>5</sup> Department of Economics, Econometrics and Finance, Faculty of Economics & Business, University of Groningen, Groningen, the Netherlands

<sup>6</sup> Department of Endocrinology. University Medical Center Groningen, University of Groningen, Groningen, The Netherlands

\*Corresponding author: [t.l.feenstra@rug.nl](mailto:t.l.feenstra@rug.nl)

**Table 1. Summary of type of interventions and comparators used in the studies.**

| Publication (author year, country)         | Intervention(s)                            |                                       | Comparator(s)                      |                                 |
|--------------------------------------------|--------------------------------------------|---------------------------------------|------------------------------------|---------------------------------|
|                                            | Method of insulin administration           | Method of CGM                         | Method of insulin administration   | Method of CGM                   |
| <b>Emamipour 2022, The Netherlands [1]</b> | MDI                                        | is-CGM (Freestyle Libre)              | NR                                 | NR                              |
| <b>Ly 2014, Australia [2]</b>              | SAP (MiniMed Paradigm Veo)                 | rt-CGM                                | CSII                               | SMBG                            |
| <b>Wan 2018, US [3]</b>                    | MDI                                        | rt-CGM (Dexcom G4 and G5)             | MDI                                | SMBG                            |
| <b>Bilir 2018, Sweden [4]</b>              | MDI or CSII                                | is-CGM (Freestyle libre)              | MDI or CSII                        | SMBG                            |
| <b>Chaugule 2017, Canada [5]</b>           | MDI                                        | rt-CGM (Dexcom G5)                    | MDI                                | SMBG                            |
| <b>Conget 2018, Spain [6]</b>              | SAP (MiniMed VEO)                          | rt-CGM                                | CSII                               | SMBG                            |
| <b>Gomez 2016, Colombia [7]</b>            | SAP                                        | rt-CGM (Enlite®Sensor)                | MDI                                | SMBG                            |
| <b>Isitt 2022, Australia [8]</b>           | MDI                                        | rt-CGM (Dexcom G6)                    | MDI                                | SMBG and is-CGM                 |
| <b>Jendle 2017, Sweden [9]</b>             | SAP (MiniMed™ 640G)                        | rt-CGM                                | CSII                               | SMBG                            |
| <b>Jendle 2019, Sweden [10]</b>            | HCL (MiniMed 670 G in auto mode)           | rt-CGM (Guardian 3)                   | CSII (MiniMed 670G in Manual mode) | SMBG                            |
| <b>Jendle 2021, Sweden [11]</b>            | HCL (MiniMed 780G system)                  | rt-CGM (Guardian 3)                   | CSII or MDI                        | isCGM (FreeStyle Libre) or SMBG |
| <b>Kamble 2012, US [12]</b>                | SAP (MiniMed Paradigm)                     | rt-CGM (Guardian REAL-Time Glucose)   | MDI                                | SMBG                            |
| <b>Lambadiari 2022, Greece [13]</b>        | HCL (MiniMed 780G)                         | rt-CGM                                | 1) SAP (MiniMed 640G)<br>2) MDI    | 1) rt-CGM<br>2) is-CGM          |
| <b>Nicolucci 2018, Italy [14]</b>          | HCL (MiniMed 640G)                         | rt-CGM (Guardian™ Sensor SmartGuard™) | CSII                               | SMBG                            |
| <b>Riemsma 2016, UK [15]</b>               | SAP (MiniMed Paradigm Veo and Animas Vibe) | rt-CGM (Enlite®Sensor and Dexcom G4)  | MDI or CSII                        | SMBG or rt-CGM                  |
| <b>Roze 2015, Sweden [16]</b>              | SAP                                        | rt-CGM                                | CSII                               | SMBG                            |
| <b>Roze 2016, France [17]</b>              | SAP                                        | rt-CGM                                | CSII                               | SMBG                            |
| <b>Roze 2016, UK [18]</b>                  | SAP                                        | rt-CGM                                | CSII                               | SMBG                            |
| <b>Roze 2017, Denmark [19]</b>             | SAP                                        | rt-CGM                                | CSII                               | SMBG                            |
| <b>Roze 2019, The Netherlands [20]</b>     | SAP                                        | rt-CGM                                | CSII                               | SMBG                            |
| <b>Roze 2019, Turkey [21]</b>              | SAP                                        | rt-CGM                                | CSII                               | SMBG                            |
| <b>Roze 2020, UK [22]</b>                  | MDI                                        | rt-CGM (Dexcom G6)                    | MDI                                | SMBG                            |

|                                                 |                                 |                                                 |                                    |                          |
|-------------------------------------------------|---------------------------------|-------------------------------------------------|------------------------------------|--------------------------|
| <b>Roze 2021, Canada [23]</b>                   | MDI                             | rt-CGM (Dexcom G6)                              | MDI                                | SMBG                     |
| <b>Roze 2021, UK [24]</b>                       | HCL (MiniMed 670G in auto mode) | rt-CGM (Guardian 3)                             | CSII (MiniMed 670G in Manual mode) | SMBG                     |
| <b>Roze 2021, France [25]</b>                   | MDI                             | rt-CGM (Dexcom G6)                              | MDI                                | SMBG                     |
| <b>Serné 2022, The Netherlands [26]</b>         | HCL (MiniMed 670 G)             | rt-CGM (Guardian 3)                             | MDI or CSII                        | is-CGM (FreeStyle Libre) |
| <b>Zhao 2021, China [27]</b>                    | -                               | is-CGM (FreeStyle Libre, FreeStyle Libre H)     | -                                  | SMBG                     |
| <b>Garcia-Lorenzo 2018, Spain [28]</b>          | MDI or CSII                     | rt-CGM                                          | MDI or CSII                        | SMBG                     |
| <b>Health Quality Ontario 2018, Canada [29]</b> | MDI, SAP, and CSII              | rt-CGM                                          | MDI or CSII                        | SMBG                     |
| <b>Huang 2010, US [30]</b>                      | MDI and CSII                    | rt-CGM (Abott Diabetes, DexCom, Medtronic)      | MDI or CSII                        | SMBG                     |
| <b>McQueen 2011, US [31]</b>                    | Not specified                   | Not specified (though CGM costs suggest rt-CGM) | Not specified                      | SMBG                     |
| <b>Pease 2020, Australia [32]</b>               | HCL (MiniMed 670G)              | rt-CGM (Guardian 3)                             | MDI                                | SMBG                     |
| <b>Pease 2022, Australia [33]</b>               | HCL (MiniMed 670/780)           | rt-CGM (Guardian 3)                             | MDI or CSII                        | SMBG                     |
| <b>Rotondi 2022, Canada [34]</b>                | -                               | rt-CGM or is-CGM                                | -                                  | SMBG                     |

Abbreviations: CGM, continuous glucose monitoring; CSII, continuous subcutaneous insulin infusion; HCL, hybrid closed loop; is-CGM, intermittently-scanned continuous glucose monitoring; MDI, multiple daily injections; NA, not applicable; NR, not reported; rt-CGM, real-time continuous glucose monitoring; SAP, sensor-augmented pump; SMBG, self-monitoring of blood glucose.

## References

1. Emamipour S, van Dijk PR, Bilo HJG, Edens MA, van der Galiën O, Postma MJ, et al. Personalizing the Use of a Intermittently Scanned Continuous Glucose Monitoring (isCGM) Device in Individuals With Type 1 Diabetes: A Cost-Effectiveness Perspective in the Netherlands (FLARE-NL 9). *J Diabetes Sci Technol*. 2022 Jul 9:19322968221109841.
2. Ly TT, Brnabic AJM, Eggleston A, Kolivos A, McBride ME, Schrover R, et al. A cost-effectiveness analysis of sensor-augmented insulin pump therapy and automated insulin suspension versus standard pump therapy for hypoglycemic unaware patients with type 1 diabetes. *Value Health*. 2014;17(5):561–9.
3. Wan W, Skandari MR, Minc A, Nathan AG, Winn A, Zarei P, et al. Cost-effectiveness of Continuous Glucose Monitoring for Adults With Type 1 Diabetes Compared With Self-Monitoring of Blood Glucose: The DIAMOND Randomized Trial. *Diabetes Care*. 2018 Jun 1;41(6):1227–34.

4. Bilir SP, Hellmund R, Wehler B, Li H, Munakata J, Lamotte M. Cost-effectiveness Analysis of a Flash Glucose Monitoring System for Patients with Type 1 Diabetes Receiving Intensive Insulin Treatment in Sweden. *Eur Endocrinol*. 2018 Sep 1;14(2):73–9.
5. Chaugule S, Graham C. Cost-effectiveness of G5 Mobile continuous glucose monitoring device compared to self-monitoring of blood glucose alone for people with type 1 diabetes from the Canadian societal perspective. *J Med Econ*. 2017 Nov 2;20(11):1128–35.
6. Conget I, Martín-Vaquero P, Roze S, Elías I, Pineda C, Álvarez M, et al. Cost-effectiveness analysis of sensor-augmented pump therapy with low glucose-suspend in patients with type 1 diabetes mellitus and high risk of hypoglycemia in Spain. *Endocrinol Diabetes Nutr*. 2018 Aug 1;65(7):380–6.
7. Gomez AM, Alfonso-Cristancho R, Orozco JJ, Lynch PM, Prieto D, Saunders R, et al. Clinical and economic benefits of integrated pump/CGM technology therapy in patients with type 1 diabetes in Colombia. *Endocrinol Nutr*. 2016 Nov 1;63(9):466–74.
8. Isitt JJ, Roze S. Long-term cost-effectiveness of Dexcom G6 real-time continuous glucose monitoring system in people with type 1 diabetes in Australia: Response to letter from Hellmund, Richard and Welsh, Zoe. *Diabet Med*. 2023 Feb 1;40(2).
9. Jendle J, Smith-Palmer J, Delbaere A, de Portu S, Papo N, Valentine W, et al. Cost-Effectiveness Analysis of Sensor-Augmented Insulin Pump Therapy with Automated Insulin Suspension Versus Standard Insulin Pump Therapy in Patients with Type 1 Diabetes in Sweden. *Diabetes Ther*. 2017 Oct 1;8(5):1015–30.
10. Jendle J, Pöhlmann J, De Portu S, Smith-Palmer J, Roze S. Cost-Effectiveness Analysis of the MiniMed 670G Hybrid Closed-Loop System Versus Continuous Subcutaneous Insulin Infusion for Treatment of Type 1 Diabetes. *Diabetes Technol Ther*. 2019 Mar 1;21(3):110–8.
11. Jendle J, Buompiersiere MI, Holm AL, de Portu S, Malkin SJP, Cohen O. The Cost-Effectiveness of an Advanced Hybrid Closed-Loop System in People with Type 1 Diabetes: a Health Economic Analysis in Sweden. *Diabetes Ther*. 2021 Nov 1;12(11):2977–91.
12. Kamble S, Schulman KA, Reed SD. Cost-effectiveness of sensor-augmented pump therapy in adults with type 1 diabetes in the United States. *Value Health*. 2012 Jul;15(5):632–8.
13. Lambadiari V, Ozdemir Saltik AZ, De Portu S, Buompiersiere MI, Kountouri A, Korakas E, et al. Cost-Effectiveness Analysis of an Advanced Hybrid Closed-Loop Insulin Delivery System in People with Type 1 Diabetes in Greece. *Diabetes Technol Ther*. 2022 May 1;24(5):316–23.
14. Nicolucci A, Rossi MC, D’Ostilio D, Delbaere A, de Portu S, Roze S. Cost-effectiveness of sensor-augmented pump therapy in two different patient populations with type 1 diabetes in Italy. *Nutr Metab Cardiovasc Dis*. 2018 Jul 1;28(7):707–15.
15. Riemsma R, Ramos IC, Birnie R, Büyükkaramikli N, Armstrong N, Ryder S, et al. Integrated sensor-augmented pump therapy systems [the MiniMed® Paradigm™ Veo system and the Vibe™ and G4® PLATINUM CGM (continuous glucose monitoring) system] for managing blood glucose levels in type 1 diabetes: a systematic review and economic evaluation. *Health Technol Assess* 2016 Feb 1;20(17):1–252.
16. Roze S, Saunders R, Brandt AS, de Portu S, Papo NL, Jendle J. Health-economic analysis of real-time continuous glucose monitoring in people with Type 1 diabetes. *Diabet Med*. 2015 May 1;32(5):618–26.
17. Roze S, Smith-Palmer J, Valentine W, Payet V, De Portu S, Papo N, et al. Cost-Effectiveness of Sensor-Augmented Pump Therapy with Low Glucose Suspend Versus Standard Insulin Pump Therapy in Two Different Patient Populations with Type 1 Diabetes in France. *Diabetes Technol Ther*. 2016 Feb 1;18(2):75–84.
18. Roze S, Smith-Palmer J, Valentine WJ, Cook M, Jethwa M, De Portu S, et al. Long-term health economic benefits of sensor-augmented pump therapy vs continuous subcutaneous insulin infusion alone in type 1 diabetes: a U.K. perspective. *J Med Econ*. 2016 Mar 3;19(3):236–42.
19. Roze S, de Portu S, Smith-Palmer J, Delbaere A, Valentine W, Ridderstråle M. Cost-effectiveness of sensor-augmented pump therapy versus standard insulin pump therapy in patients with type 1 diabetes in Denmark. *Diabetes Res Clin Pract*. 2017 Jun 1;128:6–14.

20. Roze S, Smith-Palmer J, De Portu S, Delbaere A, De Brouwer B, De Valk HW. Cost-effectiveness of sensor-augmented insulin pump therapy vs continuous subcutaneous insulin infusion in patients with type 1 diabetes in the Netherlands. *Clinicoecon Outcomes Res.* 2019;11:73–82.
21. Roze S, Smith-Palmer J, De Portu S, Özdemir Saltik AZ, Akgül T, Deyneli O. Cost-Effectiveness of Sensor-Augmented Insulin Pump Therapy Versus Continuous Insulin Infusion in Patients with Type 1 Diabetes in Turkey. *Diabetes Technol Ther.* 2019 Dec 1;21(12):727–35.
22. Roze S, Isitt J, Smith-Palmer J, Javanbakht M, Lynch P. Long-term Cost-Effectiveness of Dexcom G6 Real-time Continuous Glucose Monitoring Versus Self-Monitoring of Blood Glucose in Patients With Type 1 Diabetes in the U.K. *Diabetes Care.* 2020 Oct 1;43(10):2411–7.
23. Roze S, Isitt JJ, Smith-Palmer J, Lynch P. Evaluation of the Long-Term Cost-Effectiveness of the Dexcom G6 Continuous Glucose Monitor versus Self-Monitoring of Blood Glucose in People with Type 1 Diabetes in Canada. *Clinicoecon Outcomes Res.* 2021;13:717–25.
24. Roze S, Buompiensiere MI, Ozdemir Z, de Portu S, Cohen O. Cost-effectiveness of a novel hybrid closed-loop system compared with continuous subcutaneous insulin infusion in people with type 1 diabetes in the UK. *J Med Econ.* 2021;24(1):883–90.
25. Roze S, Isitt JJ, Smith-Palmer J, Lynch P, Klinkenbijn B, Zammit G, et al. Long-Term Cost-Effectiveness the Dexcom G6 Real-Time Continuous Glucose Monitoring System Compared with Self-Monitoring of Blood Glucose in People with Type 1 Diabetes in France. *Diabetes Ther.* 2021 Jan 1;12(1):235–46.
26. Serné EH, Roze S, Buompiensiere MI, Valentine WJ, De Portu S, de Valk HW. Cost-Effectiveness of Hybrid Closed Loop Insulin Pumps Versus Multiple Daily Injections Plus Intermittently Scanned Glucose Monitoring in People With Type 1 Diabetes in The Netherlands. *Adv Ther.* 2022 Apr 1;39(4):1844–56.
27. Zhao X, Ming J, Qu S, Li HJ, Wu J, Ji L, et al. Cost-Effectiveness of Flash Glucose Monitoring for the Management of Patients with Type 1 and Patients with Type 2 Diabetes in China. *Diabetes Ther.* 2021 Dec 1;12(12):3079–92.
28. García-Lorenzo B, Rivero-Santana A, Vallejo-Torres L, Castilla-Rodríguez I, García-Pérez S, García-Pérez L, et al. Cost-effectiveness analysis of real-time continuous monitoring glucose compared to self-monitoring of blood glucose for diabetes mellitus in Spain. *J Eval Clin Pract.* 2018 Aug 1;24(4):772–81.
29. Continuous Monitoring of Glucose for Type 1 Diabetes: A Health Technology Assessment. Ontario; 2018 Feb.
30. Huang ES, O’Grady M, Basu A, Winn A, John P, Lee J, et al. The cost-effectiveness of continuous glucose monitoring in type 1 diabetes. *Diabetes Care.* 2010 Jun;33(6):1269–74.
31. McQueen RB, Ellis SL, Campbell JD, Nair K V., Sullivan PW. Cost-effectiveness of continuous glucose monitoring and intensive insulin therapy for type 1 diabetes. *Cost Eff Resour Alloc.* 2011 Sep 14;9.
32. Pease A, Zomer E, Liew D, Earnest A, Soldatos G, Ademi Z, et al. Cost-Effectiveness Analysis of a Hybrid Closed-Loop System Versus Multiple Daily Injections and Capillary Glucose Testing for Adults with Type 1 Diabetes. *Diabetes Technol Ther.* 2020 Nov 1;22(11):812–21.
33. Pease A, Callander E, Zomer E, Abraham MB, Davis EA, Jones TW, et al. The Cost of Control: Cost-effectiveness Analysis of Hybrid Closed-Loop Therapy in Youth. *Diabetes Care.* 2022 Sep 1;45(9):1971–80.
34. Rotondi MA, Wong O, Riddell M, Perkins B. Population-Level Impact and Cost-effectiveness of Continuous Glucose Monitoring and Intermittently Scanned Continuous Glucose Monitoring Technologies for Adults With Type 1 Diabetes in Canada: A Modeling Study. *Diabetes Care.* 2022 Sep 1;45(9):2012–9.
