# Supplementary material for: Evaluating the Cost-Utility of Continuous Glucose Monitoring in Individuals with Type 1 Diabetes: A Systematic Review of the Methods and Quality of Studies Using Decision Models or Empirical Data
Source: PubMed Central journal article supplement — Pharmacoeconomics. 2024 Jun 21;42(9):929–53. doi: 10.1007/s40273-024-01388-6 (PMC11343921; doi:10.1007/s40273-024-01388-6), 2024-06-21
Supplement: 40273_2024_1388_MOESM7_ESM.pdf [file 40273_2024_1388_MOESM7_ESM.pdf]

## Supplementary Information – Online Resource 7

Evaluating cost-utility of continuous glucose monitoring in individuals with type 1 diabetes: a systematic review of methods and quality of studies using decision models and/or empirical data.

de Jong LA<sup>1\*</sup> (ORCID ID: 0000-0001-8814-0670), Li X<sup>2</sup> (ORCID ID: 0000-0002-0225-6937), Emamipour S<sup>3</sup>, van der Werf S<sup>4</sup> (ORCID ID: 0000-0001-5856-7657), Postma MJ<sup>1,5</sup>, van Dijk PR<sup>6</sup> (ORCID ID: 0000-0002-9702-6551), Feenstra TL<sup>2</sup> (ORCID ID: 0000-0002-5788-0454)

<sup>1</sup> Department of Health Sciences, University Medical Center Groningen, University of Groningen, Groningen, the Netherlands

<sup>2</sup> Unit of Pharmacotherapy, -Epidemiology & -Economics, University of Groningen, Groningen Research Institute of Pharmacy (GRIP), Groningen, the Netherlands

<sup>3</sup> Department of Clinical Pharmacy and Pharmacology, University Medical Center Groningen, University of Groningen, Groningen, the Netherlands

<sup>4</sup> Central Medical Library, University Medical Center Groningen, University of Groningen, Groningen, the Netherlands

<sup>5</sup> Department of Economics, Econometrics and Finance, Faculty of Economics & Business, University of Groningen, Groningen, the Netherlands

<sup>6</sup> Department of Endocrinology, University Medical Center Groningen, University of Groningen, Groningen, The Netherlands

\*Corresponding author: t.l.feenstra@rug.nl

**Table 1. Economic evaluation methodology: empirical-data-based cost-utility studies**

| Publication (author year, country)         | Study design                                                                                                                                                                                                                                                                                          | Rationale for the design | Number of patients | Study follow-up | Study period                  | Location and setting of the study                           | Clinical outcomes measures included in the study         |                               | Costs and quality of life measures included in the study                                                                                                                                                       |                                 |
|--------------------------------------------|-------------------------------------------------------------------------------------------------------------------------------------------------------------------------------------------------------------------------------------------------------------------------------------------------------|--------------------------|--------------------|-----------------|-------------------------------|-------------------------------------------------------------|----------------------------------------------------------|-------------------------------|----------------------------------------------------------------------------------------------------------------------------------------------------------------------------------------------------------------|---------------------------------|
|                                            |                                                                                                                                                                                                                                                                                                       |                          |                    |                 |                               |                                                             | Diabetes complications included                          | Hypoglycemic events included? | Costs                                                                                                                                                                                                          | Quality of life                 |
| <b>Emamipour 2022, The Netherlands</b> [1] | Nationwide Dutch observational study (FLARE-NL), which has a prospective, observational design. The study compared costs and outcomes 12 months before and after using isCGM.                                                                                                                         | Yes                      | 381                | 12 months       | Started in year 2016          | Dutch hospitals                                             | No, only compared EQ-5D between the groups               | No                            | Costs or health care resource use were not measured in the FLARE-NL study. Therefore, healthcare spending was derived from linked health insurance data.                                                       | EQ-5D-3L collected in the study |
| <b>Ly 2014, Australia</b> [2]              | Unblinded RCT involving patients with type 1 diabetes. Patients were randomized to insulin pump only or automated insulin suspension for 6 months, stratified by 5 age groups.                                                                                                                        | Yes                      | 95                 | 6 months        | December 2009 to January 2012 | Tertiary adult and pediatric hospitals in Western Australia | Yes, hypoglycemia                                        | Yes                           | Resource use data (non-protocol-driven) over the 6-month study period were entered into the analysis.                                                                                                          | EQ-5D-3L collected in the study |
| <b>Wan 2018, US</b> [3]                    | Unblinded multicenter trial (DIAMOND), involving 158 patients with T1D and HbA1c $\geq 7.5\%$ using multiple insulin injections were randomly assigned in a 2:1 ratio to CGM or SMBG, usual care (control), stratified by clinical site and HbA1c level ( $< 8.5\%$ and $\geq 8.5\%$ ), for 6 months. | No                       | 158                | 6 months        | October 2014 to December 2015 | US multicenter                                              | Yes: NSHEs, SHEs, HbA1c levels, insulin dosing, and BMI. | Yes                           | Total costs included all direct costs associated with clinical care provided by trial personnel, CGM device use, health care services, test strip use, and medications and also indirect costs associated with | EQ-5D-5L collected in the study |

|                            |                                                                                                                                                             |    |     |          |                  |                  |                  |                  |                                                                                                                                                                                                                                                                                                                                                                                                                                                                                                      |                            |
|----------------------------|-------------------------------------------------------------------------------------------------------------------------------------------------------------|----|-----|----------|------------------|------------------|------------------|------------------|------------------------------------------------------------------------------------------------------------------------------------------------------------------------------------------------------------------------------------------------------------------------------------------------------------------------------------------------------------------------------------------------------------------------------------------------------------------------------------------------------|----------------------------|
|                            |                                                                                                                                                             |    |     |          |                  |                  |                  |                  | patients' reduced work productivity and daily hours devoted to diabetes care.                                                                                                                                                                                                                                                                                                                                                                                                                        |                            |
| <b>Huang 2010, US [34]</b> | A randomized, parallel group, efficacy and safety study, in which patients with T1D were randomized to CGM versus standard glucose monitoring for 6 months. | No | 228 | 6 months | NR in this study | Costs estimated in the trial included staff time spent with patients or for CGM training and diabetes management; costs related to CGM and glucose monitor utilization; costs related to health service utilization outside of the trial (routine office visits, after-hours clinic visits, emergency room visits, 911 calls, and hospitalization); indirect costs for hours devoted to diabetes care, missed days from work or school due to diabetes, and number of days of work underperformance. | TTO collected in the study |

Abbreviations: BMI, body mass index; CGM, continuous glucose monitoring; isCGM, intermittently-scanned continuous glucose monitoring; NSHE, non-severe hypoglycemic event; SHE, severe hypoglycemic event; SMBG, self-monitoring blood glucose; T1D, type 1 diabetes; US, United States.

## References

1. Emamipour S, van Dijk PR, Bilo HJG, Edens MA, van der Galiën O, Postma MJ, et al. Personalizing the Use of a Intermittently Scanned Continuous Glucose Monitoring (isCGM) Device in Individuals With Type 1 Diabetes: A Cost-Effectiveness Perspective in the Netherlands (FLARE-NL 9). *J Diabetes Sci Technol*. 2022 Jul 9:19322968221109841.
2. Ly TT, Brnabic AJM, Eggleston A, Kolivos A, McBride ME, Schrover R, et al. A cost-effectiveness analysis of sensor-augmented insulin pump therapy and automated insulin suspension versus standard pump therapy for hypoglycemic unaware patients with type 1 diabetes. *Value Health*. 2014;17(5):561–9.
3. Wan W, Skandari MR, Minc A, Nathan AG, Winn A, Zarei P, et al. Cost-effectiveness of Continuous Glucose Monitoring for Adults With Type 1 Diabetes Compared With Self-Monitoring of Blood Glucose: The DIAMOND Randomized Trial. *Diabetes Care*. 2018 Jun 1;41(6):1227–34.
4. ES Huang M O'Grady A Basu A Winn P John J Lee et al 2010 The cost-effectiveness of continuous glucose monitoring in type 1 diabetes *Diabetes Care* 33 1269 1274
