# Supplementary material for: Evaluating the Cost-Utility of Continuous Glucose Monitoring in Individuals with Type 1 Diabetes: A Systematic Review of the Methods and Quality of Studies Using Decision Models or Empirical Data
Source: PubMed Central journal article supplement — Pharmacoeconomics. 2024 Jun 21;42(9):929–53. doi: 10.1007/s40273-024-01388-6 (PMC11343921; doi:10.1007/s40273-024-01388-6), 2024-06-21
Supplement: 40273_2024_1388_MOESM8_ESM.pdf [file 40273_2024_1388_MOESM8_ESM.pdf]

## Supplementary Information – Online Resource 8

Evaluating cost-utility of continuous glucose monitoring in individuals with type 1 diabetes: a systematic review of methods and quality of studies using decision models and/or empirical data.

de Jong LA<sup>1\*</sup> (ORCID ID: 0000-0001-8814-0670), Li X<sup>2</sup> (ORCID ID: 0000-0002-0225-6937), Emamipour S<sup>3</sup>, van der Werf S<sup>4</sup> (ORCID ID: 0000-0001-5856-7657), Postma MJ<sup>1,5</sup>, van Dijk PR<sup>6</sup> (ORCID ID: 0000-0002-9702-6551), Feenstra TL<sup>2</sup> (ORCID ID: 0000-0002-5788-0454)

<sup>1</sup> Department of Health Sciences, University Medical Center Groningen, University of Groningen, Groningen, the Netherlands

<sup>2</sup> Unit of Pharmacotherapy, -Epidemiology & -Economics, University of Groningen, Groningen Research Institute of Pharmacy (GRIP), Groningen, the Netherlands

<sup>3</sup> Department of Clinical Pharmacy and Pharmacology, University Medical Center Groningen, University of Groningen, Groningen, the Netherlands

<sup>4</sup> Central Medical Library, University Medical Center Groningen, University of Groningen, Groningen, the Netherlands

<sup>5</sup> Department of Economics, Econometrics and Finance, Faculty of Economics & Business, University of Groningen, Groningen, the Netherlands

<sup>6</sup> Department of Endocrinology. University Medical Center Groningen, University of Groningen, Groningen, The Netherlands

\*Corresponding author: [t.l.feenstra@rug.nl](mailto:t.l.feenstra@rug.nl)

**Table 1. Economic evaluation methodology: model-based cost-utility studies.**

| Publication (author year, country) | Model used (version if available) | Model type                                | References for model structure (and validation) of the model | Rationale for model choice | Cycle length                                                       | Hypoglycemic events modelled? | Definition hypoglycemia                                                                                                                                                                                                                                            |
|------------------------------------|-----------------------------------|-------------------------------------------|--------------------------------------------------------------|----------------------------|--------------------------------------------------------------------|-------------------------------|--------------------------------------------------------------------------------------------------------------------------------------------------------------------------------------------------------------------------------------------------------------------|
| <b>Wan 2018, US [1]</b>            | Sheffield diabetes model          | Individual patient-level simulation model | Thokala 2014 [2]                                             | Yes                        | One year                                                           | Yes                           | NSHEs were defined as the detection of a glucose value <3.0 mmol/L (<54 mg/dL) for at least 20 consecutive minutes, considered to be clinically significant biochemical hypoglycemia according to the International Hypoglycemia Study Group recommendations (21). |
| <b>Bilir 2018, Sweden [3]</b>      | CORE diabetes model (v9.0)        | Individual patient-level Markov model     | Palmer 2004 [4]<br>Palmer 2004 [5]<br>McEwan 2014 [6]        | No                         | One year, except foot ulcer (1 month) and hypoglycemia (3 months). | Yes                           | Severe hypoglycemic events may require third-party medical assistance (SHE2s) or third-party non-medical assistance (SHE1s). The model also considers non-severe hypoglycemic events (NSHEs). SHEs: < 40 mg/dl                                                     |
| <b>Chaugule 2017, Canada [7]</b>   | CORE diabetes model (v9.0)        | Individual patient-level Markov model     | McEwan 2014 [6]                                              | Yes                        | One year, except foot ulcer (1 month) and hypoglycemia (3 months). | Yes                           | SHE1: severe hypoglycemic event requiring non-medical assistance<br>SHE2: severe hypoglycemic events requiring medical assistance from a third party                                                                                                               |
| <b>Conget 2018, Spain [8]</b>      | CORE diabetes model               | Individual patient-level Markov model     | McEwan 2014 [6]                                              | No                         | One year, except foot ulcer (1 month) and hypoglycemia (3 months). | Yes                           | NR                                                                                                                                                                                                                                                                 |
| <b>Gomez 2016, Colombia [9]</b>    | CORE diabetes model (v8.5)        | Individual patient-level Markov model     | Palmer 2004 [4]<br>Palmer 2004 [5]                           | Yes                        | One year, except foot ulcer (1 month) and hypoglycemia (3 months). | Yes                           | NR                                                                                                                                                                                                                                                                 |

|                                     |                            |                                       |                                                       |     |                                                                    |     |                                                                       |
|-------------------------------------|----------------------------|---------------------------------------|-------------------------------------------------------|-----|--------------------------------------------------------------------|-----|-----------------------------------------------------------------------|
| <b>Isitt 2022, Australia</b> [10]   | CORE diabetes model        | Individual patient-level Markov model | Palmer 2004 [4]<br>Palmer 2004 [5]<br>McEwan 2014 [6] | No  | One year, except foot ulcer (1 month) and hypoglycemia (3 months). | Yes | NR                                                                    |
| <b>Jendle 2017, Sweden</b> [11]     | CORE diabetes model        | Individual patient-level Markov model | Palmer 2004 [4]<br>Palmer 2004 [5]<br>McEwan 2014 [6] | No  | One year, except foot ulcer (1 month) and hypoglycemia (3 months). | Yes | NR                                                                    |
| <b>Jendle 2019, Sweden</b> [12]     | CORE diabetes model        | Individual patient-level Markov model | Palmer 2004 [4]<br>Palmer 2004 [5]<br>McEwan 2014 [6] | No  | One year, except foot ulcer (1 month) and hypoglycemia (3 months). | Yes | NR                                                                    |
| <b>Jendle 2021, Sweden</b> [13]     | CORE diabetes model (v9.0) | Individual patient-level Markov model | Palmer 2004 [4]<br>Palmer 2004 [5]<br>McEwan 2014 [6] | No  | One year, except foot ulcer (1 month) and hypoglycemia (3 months). | Yes | Severe hypoglycemic events: requiring the assistance of a third party |
| <b>Kamble 2012, US</b> [14]         | CORE diabetes model (v7.0) | Individual patient-level Markov model | Palmer 2004 [4]<br>Palmer 2004 [5]                    | No  | One year, except foot ulcer (1 month) and hypoglycemia (3 months). | Yes | NR                                                                    |
| <b>Lambadiari 2022, Greece</b> [15] | CORE diabetes model        | Individual patient-level Markov model | Palmer 2004 [4]<br>Palmer 2004 [5]<br>McEwan 2014 [6] | No  | One year, except foot ulcer (1 month) and hypoglycemia (3 months). | Yes | NR                                                                    |
| <b>Nicolucci 2018, Italy</b> [16]   | CORE diabetes model        | Individual patient-level Markov model | Palmer 2004 [4]<br>Palmer 2004 [5]<br>McEwan 2014 [6] | Yes | One year, except foot ulcer (1 month) and hypoglycemia (3 months). | Yes | SHE was defined as hypoglycemic seizure or coma                       |

|                                        |                            |                                       |                                                       |     |                                                                    |     |                                                                                                                       |
|----------------------------------------|----------------------------|---------------------------------------|-------------------------------------------------------|-----|--------------------------------------------------------------------|-----|-----------------------------------------------------------------------------------------------------------------------|
| <b>Riemsma 2016, UK</b> [17]           | CORE diabetes model (v8.5) | Individual patient-level Markov model | McEwan 2014 [6]                                       | Yes | One year, except foot ulcer (1 month) and hypoglycemia (3 months). | Yes | Severe hypoglycemia: an episode that required assistance from a third party. glucose < 3.6 mmol/l was also mentioned. |
| <b>Roze 2015, Sweden</b> [18]          | CORE diabetes model        | Individual patient-level Markov model | Palmer 2004 [4]<br>Palmer 2004 [5]<br>Roze 2005 [19]  | No  | One year, except foot ulcer (1 month) and hypoglycemia (3 months). | Yes | NR                                                                                                                    |
| <b>Roze 2016, France</b> [20]          | CORE diabetes model        | Individual patient-level Markov model | Palmer 2004 [4]<br>Palmer 2004 [5]<br>McEwan 2014 [6] | No  | One year, except foot ulcer (1 month) and hypoglycemia (3 months). | Yes | NR                                                                                                                    |
| <b>Roze 2016, UK</b> [21]              | CORE diabetes model        | Individual patient-level Markov model | Palmer 2004 [4]<br>Palmer 2004 [5]<br>McEwan 2014 [6] | No  | One year, except foot ulcer (1 month) and hypoglycemia (3 months). | Yes | NR                                                                                                                    |
| <b>Roze 2017, Denmark</b> [22]         | CORE diabetes model        | Individual patient-level Markov model | Palmer 2004 [4]<br>Palmer 2004 [5]<br>McEwan 2014 [6] | No  | One year, except foot ulcer (1 month) and hypoglycemia (3 months). | Yes | NR                                                                                                                    |
| <b>Roze 2019, The Netherlands</b> [23] | CORE diabetes model        | Individual patient-level Markov model | Palmer 2004 [4]                                       | No  | One year, except foot ulcer (1 month) and hypoglycemia (3 months). | Yes | NR                                                                                                                    |
| <b>Roze 2019, Turkey</b> [24]          | CORE diabetes model        | Individual patient-level Markov model | Palmer 2004 [4]<br>Palmer 2004 [5]                    | No. | One year, except foot ulcer (1 month) and hypoglycemia (3 months). | Yes | NR                                                                                                                    |

|                                         |                                                               |                                            |                                                       |     |                                                                    |                                      |                                                                                                                                                                                                                                                            |
|-----------------------------------------|---------------------------------------------------------------|--------------------------------------------|-------------------------------------------------------|-----|--------------------------------------------------------------------|--------------------------------------|------------------------------------------------------------------------------------------------------------------------------------------------------------------------------------------------------------------------------------------------------------|
| <b>Roze 2020, UK [25]</b>               | CORE diabetes model                                           | Individual patient-level Markov model      | None                                                  | No  | One year, except foot ulcer (1 month) and hypoglycemia (3 months). | Yes                                  | SHEs; defined as an event requiring medical assistance                                                                                                                                                                                                     |
| <b>Roze 2021, Canada [26]</b>           | CORE diabetes model                                           | Individual patient-level Markov model      | Palmer 2004 [4]<br>Palmer 2004 [5]<br>McEwan 2014 [6] | No  | One year, except foot ulcer (1 month) and hypoglycemia (3 months). | Yes                                  | SHEs; defined as an event requiring medical assistance                                                                                                                                                                                                     |
| <b>Roze 2021, UK [27]</b>               | CORE diabetes model                                           | Individual patient-level Markov model      | Palmer 2004 [4]<br>Palmer 2004 [5]<br>McEwan 2014 [6] | Yes | One year, except foot ulcer (1 month) and hypoglycemia (3 months). | Yes                                  | NR                                                                                                                                                                                                                                                         |
| <b>Roze 2021, France [28]</b>           | CORE diabetes model (v9.0)                                    | Individual patient-level Markov model      | Palmer 2004 [4]<br>Palmer 2004 [5]                    | No  | One year, except foot ulcer (1 month) and hypoglycemia (3 months). | Yes                                  | A series of $\geq 2$ glucose sensor values $< 3.0$ mmol/l [54 mg/dl] with a duration of at least 20 min.                                                                                                                                                   |
| <b>Serné 2022, The Netherlands [29]</b> | CORE diabetes model                                           | Individual patient-level Markov model      | Palmer 2004 [4]<br>Palmer 2004 [5]<br>McEwan 2014 [6] | No  | One year, except foot ulcer (1 month) and hypoglycemia (3 months). | Yes                                  | NR                                                                                                                                                                                                                                                         |
| <b>Zhao 2021, China [30]</b>            | CORE diabetes model (v9.5)                                    | Individual patient-level Markov model      | McEwan 2014 [6]                                       | Yes | One year, except foot ulcer (1 month) and hypoglycemia (3 months). | Yes                                  | Hypoglycemia was defined as three levels in CDM: (1) non-severe hypoglycemia event (NSHE); (2) severe hypoglycemia event grade 1 (SHE1), requiring non-medical assistance; and (3) severe hypoglycemia event grade 2 (SHE2), requiring medical assistance. |
| <b>Garcia-Lorenzo 2018, Spain [31]</b>  | Study's own Markov Model<br>Adjusted from McQueen et al. [26] | Cohort-based State Transition Markov Model | McQueen 2011 [32]                                     | No  | One year                                                           | No (since no effect was found in the | SHE: require the assistance of another person                                                                                                                                                                                                              |

|                                                 |                                                                                                                                                             |                                            |                                                                                   |     |          | meta-analysis) |    |
|-------------------------------------------------|-------------------------------------------------------------------------------------------------------------------------------------------------------------|--------------------------------------------|-----------------------------------------------------------------------------------|-----|----------|----------------|----|
| <b>Health Quality Ontario 2018, Canada [33]</b> | A transition-state model structure developed by McQueen et al [26]                                                                                          | Cohort-based State Transition Markov Model | McQueen 2011 [32]                                                                 | Yes | One year | Yes            | NR |
| <b>Huang 2010, US [34]</b>                      | Study's own Markov Model (Monte-Carlo based)                                                                                                                | Cohort-based State Transition Markov Model | DCCT. 1996 [35]                                                                   | NR  | One year | No             | NA |
| <b>McQueen 2011, US [32]</b>                    | Study's own Markov Model with input from CDC Cost-Effectiveness Group model                                                                                 | Cohort-based State Transition Markov Model | NA                                                                                | Yes | One year | No             | NA |
| <b>Pease 2020, Australia [36]</b>               | Study's own Markov Model                                                                                                                                    | Cohort-based State Transition Markov Model | NA                                                                                | Yes | One year | Yes            | NR |
| <b>Pease 2022, Australia [37]</b>               | Study's own patient-level Markov Model                                                                                                                      | Individual patient-level Markov model      | NA                                                                                | Yes | One year | Yes            | NR |
| <b>Rotondi 2022, Canada [38]</b>                | A Markov cost-effectiveness model adapted from the Ontario Health (OH) [27] report and previous work by Garcia-Lorenzo et al. [31] and McQueen et al. [26]. | Cohort-based State Transition Markov Model | Health Quality Ontario 2018 [33]<br>Garcia-Lorenzo 2018 [31]<br>McQueen 2011 [32] | No  | One year | Yes            | NR |

Abbreviations: DCCT, diabetes control and complications trial; NA, not applicable; NR, not reported; SHE, severe hypoglycemic event.

## References

1. Wan W, Skandari MR, Minc A, Nathan AG, Winn A, Zarei P, et al. Cost-effectiveness of Continuous Glucose Monitoring for Adults With Type 1 Diabetes Compared With Self-Monitoring of Blood Glucose: The DIAMOND Randomized Trial. *Diabetes Care*. 2018;41:1227–34.
2. Thokala P, Kruger J, Brennan A, Basarir H, Duenas A, Pandor A, et al. Assessing the cost-effectiveness of type 1 diabetes interventions: the Sheffield type 1 diabetes policy model. *Diabet Med*. 2014;31:477–86.
3. Bilir SP, Hellmund R, Wehler B, Li H, Munakata J, Lamotte M. Cost-effectiveness Analysis of a Flash Glucose Monitoring System for Patients with Type 1 Diabetes Receiving Intensive Insulin Treatment in Sweden. *Eur Endocrinol*. 2018;14:73–9.
4. Palmer AJ, Roze S, Valentine WJ, Minshall ME, Foos V, Lurati FM, et al. The CORE Diabetes Model: Projecting long-term clinical outcomes, costs and cost-effectiveness of interventions in diabetes mellitus (types 1 and 2) to support clinical and reimbursement decision-making. *Curr Med Res Opin*. 2004;20 Suppl 1.
5. Palmer AJ, Roze S, Valentine WJ, Minshall ME, Foos V, Lurati FM, et al. Validation of the CORE Diabetes Model against epidemiological and clinical studies. *Curr Med Res Opin*. 2004;20 Suppl 1.
6. McEwan P, Foos V, Palmer JL, Lamotte M, Lloyd A, Grant D. Validation of the IMS CORE Diabetes Model. *Value Health*. 2014;17:714–24.
7. Chaugule S, Graham C. Cost-effectiveness of G5 Mobile continuous glucose monitoring device compared to self-monitoring of blood glucose alone for people with type 1 diabetes from the Canadian societal perspective. *J Med Econ*. 2017;20:1128–35.
8. Conget I, Martín-Vaquero P, Roze S, Elías I, Pineda C, Álvarez M, et al. Cost-effectiveness analysis of sensor-augmented pump therapy with low glucose-suspend in patients with type 1 diabetes mellitus and high risk of hypoglycemia in Spain. *Endocrinol Diabetes Nutr*. 2018;65:380–6.
9. Gomez AM, Alfonso-Cristancho R, Orozco JJ, Lynch PM, Prieto D, Saunders R, et al. Clinical and economic benefits of integrated pump/CGM technology therapy in patients with type 1 diabetes in Colombia. *Endocrinol Nutr*. 2016;63:466–74.
10. Isitt JJ, Roze S, Tilden D, Arora N, Palmer AJ, Jones T, Rentoul D, Lynch P. Long-term cost-effectiveness of Dexcom G6 real-time continuous glucose monitoring system in people with type 1 diabetes in Australia. *Diabet Med*. 2022 Jul;39(7):e14831.
11. Jendle J, Smith-Palmer J, Delbaere A, de Portu S, Papo N, Valentine W, et al. Cost-Effectiveness Analysis of Sensor-Augmented Insulin Pump Therapy with Automated Insulin Suspension Versus Standard Insulin Pump Therapy in Patients with Type 1 Diabetes in Sweden. *Diabetes Ther*. 2017;8:1015–30.
12. Jendle J, Pöhlmann J, De Portu S, Smith-Palmer J, Roze S. Cost-Effectiveness Analysis of the MiniMed 670G Hybrid Closed-Loop System Versus Continuous Subcutaneous Insulin Infusion for Treatment of Type 1 Diabetes. *Diabetes Technol Ther*. 2019;21:110–8.
13. Jendle J, Buompiensiere MI, Holm AL, de Portu S, Malkin SJP, Cohen O. The Cost-Effectiveness of an Advanced Hybrid Closed-Loop System in People with Type 1 Diabetes: a Health Economic Analysis in Sweden. *Diabetes Ther*. 2021;12:2977–91.
14. Kamble S, Schulman KA, Reed SD. Cost-effectiveness of sensor-augmented pump therapy in adults with type 1 diabetes in the United States. *Value Health*. 2012;15:632–8.
15. Lambadiari V, Ozdemir Saltik AZ, De Portu S, Buompiensiere MI, Kountouri A, Korakas E, et al. Cost-Effectiveness Analysis of an Advanced Hybrid Closed-Loop Insulin Delivery System in People with Type 1 Diabetes in Greece. *Diabetes Technol Ther*. 2022;24:316–23.
16. Nicolucci A, Rossi MC, D’Ostilio D, Delbaere A, de Portu S, Roze S. Cost-effectiveness of sensor-augmented pump therapy in two different patient populations with type 1 diabetes in Italy. *Nutr Metab Cardiovasc Dis*. 2018;28:707–15.

17. Riemsma R, Ramos IC, Birnie R, Büyükkaramikli N, Armstrong N, Ryder S, et al. Integrated sensor-augmented pump therapy systems [the MiniMed® Paradigm™ Veo system and the Vibe™ and G4® PLATINUM CGM (continuous glucose monitoring) system] for managing blood glucose levels in type 1 diabetes: a systematic review and economic evaluation. *Health Technol Assess.* 2016;20:1–252.
18. Roze S, Saunders R, Brandt AS, de Portu S, Papo NL, Jendle J. Health-economic analysis of real-time continuous glucose monitoring in people with Type 1 diabetes. *Diabet Med.* 2015;32:618–26.
19. Roze S, Valentine WJ, Zakrzewska KE, Palmer AJ. Health-economic comparison of continuous subcutaneous insulin infusion with multiple daily injection for the treatment of Type 1 diabetes in the UK. *Diabet Med.* 2005;22:1239–45.
20. Roze S, Smith-Palmer J, Valentine W, Payet V, De Portu S, Papo N, et al. Cost-Effectiveness of Sensor-Augmented Pump Therapy with Low Glucose Suspend Versus Standard Insulin Pump Therapy in Two Different Patient Populations with Type 1 Diabetes in France. *Diabetes Technol Ther.* 2016;18:75–84.
21. Roze S, Smith-Palmer J, Valentine WJ, Cook M, Jethwa M, De Portu S, et al. Long-term health economic benefits of sensor-augmented pump therapy vs continuous subcutaneous insulin infusion alone in type 1 diabetes: a U.K. perspective. *J Med Econ.* 2016;19:236–42.
22. Roze S, de Portu S, Smith-Palmer J, Delbaere A, Valentine W, Ridderstråle M. Cost-effectiveness of sensor-augmented pump therapy versus standard insulin pump therapy in patients with type 1 diabetes in Denmark. *Diabetes Res Clin Pract.* 2017;128:6–14.
23. Roze S, Smith-Palmer J, De Portu S, Delbaere A, De Brouwer B, De Valk HW. Cost-effectiveness of sensor-augmented insulin pump therapy vs continuous subcutaneous insulin infusion in patients with type 1 diabetes in the Netherlands. *Clinicoecon Outcomes Res.* 2019;11:73–82.
24. Roze S, Smith-Palmer J, De Portu S, Özdemir Saltik AZ, Akgül T, Deyneli O. Cost-Effectiveness of Sensor-Augmented Insulin Pump Therapy Versus Continuous Insulin Infusion in Patients with Type 1 Diabetes in Turkey. *Diabetes Technol Ther.* 2019;21:727–35.
25. Roze S, Isitt J, Smith-Palmer J, Javanbakht M, Lynch P. Long-term Cost-Effectiveness of Dexcom G6 Real-time Continuous Glucose Monitoring Versus Self-Monitoring of Blood Glucose in Patients With Type 1 Diabetes in the U.K. *Diabetes Care.* 2020;43:2411–7.
26. Roze S, Isitt JJ, Smith-Palmer J, Lynch P. Evaluation of the Long-Term Cost-Effectiveness of the Dexcom G6 Continuous Glucose Monitor versus Self-Monitoring of Blood Glucose in People with Type 1 Diabetes in Canada. *Clinicoecon Outcomes Res.* 2021;13:717–25.
27. Roze S, Buompensiere MI, Ozdemir Z, de Portu S, Cohen O. Cost-effectiveness of a novel hybrid closed-loop system compared with continuous subcutaneous insulin infusion in people with type 1 diabetes in the UK. *J Med Econ.* 2021;24:883–90.
28. Roze S, Isitt JJ, Smith-Palmer J, Lynch P, Klinkenbijn B, Zammit G, et al. Long-Term Cost-Effectiveness the Dexcom G6 Real-Time Continuous Glucose Monitoring System Compared with Self-Monitoring of Blood Glucose in People with Type 1 Diabetes in France. *Diabetes Ther.* 2021;12:235–46.
29. Serné EH, Roze S, Buompensiere MI, Valentine WJ, De Portu S, de Valk HW. Cost-Effectiveness of Hybrid Closed Loop Insulin Pumps Versus Multiple Daily Injections Plus Intermittently Scanned Glucose Monitoring in People With Type 1 Diabetes in The Netherlands. *Adv Ther.* 2022;39:1844–56.
30. Zhao X, Ming J, Qu S, Li HJ, Wu J, Ji L, et al. Cost-Effectiveness of Flash Glucose Monitoring for the Management of Patients with Type 1 and Patients with Type 2 Diabetes in China. *Diabetes Ther.* 2021;12:3079–92.
31. García-Lorenzo B, Rivero-Santana A, Vallejo-Torres L, Castilla-Rodríguez I, García-Pérez S, García-Pérez L, et al. Cost-effectiveness analysis of real-time continuous monitoring glucose compared to self-monitoring of blood glucose for diabetes mellitus in Spain. *J Eval Clin Pract.* 2018;24:772–81.
32. McQueen RB, Ellis SL, Campbell JD, Nair K V., Sullivan PW. Cost-effectiveness of continuous glucose monitoring and intensive insulin therapy for type 1 diabetes. *Cost Eff Resour Alloc.* 2011;9.



33. Health Quality Ontario. Continuous Monitoring of Glucose for Type 1 Diabetes: A Health Technology Assessment. *Ont Health Technol Assess Ser.* 2018 Feb 21;18(2):1-160.
34. Huang ES, O'Grady M, Basu A, Winn A, John P, Lee J, et al. The cost-effectiveness of continuous glucose monitoring in type 1 diabetes. *Diabetes Care.* 2010;33:1269–74.
35. The Diabetes Control and Complications Trial Research Group. Lifetime Benefits and Costs of Intensive Therapy as Practiced in the Diabetes Control and Complications Trial. *JAMA.* 1996;276:1409–15.
36. Pease A, Zomer E, Liew D, Earnest A, Soldatos G, Ademi Z, et al. Cost-Effectiveness Analysis of a Hybrid Closed-Loop System Versus Multiple Daily Injections and Capillary Glucose Testing for Adults with Type 1 Diabetes. *Diabetes Technol Ther.* 2020;22:812–21.
37. Pease A, Callander E, Zomer E, Abraham MB, Davis EA, Jones TW, et al. The Cost of Control: Cost-effectiveness Analysis of Hybrid Closed-Loop Therapy in Youth. *Diabetes Care.* 2022;45:1971–80.
38. Rotondi MA, Wong O, Riddell M, Perkins B. Population-Level Impact and Cost-effectiveness of Continuous Glucose Monitoring and Intermittently Scanned Continuous Glucose Monitoring Technologies for Adults With Type 1 Diabetes in Canada: A Modeling Study. *Diabetes Care.* 2022;45:2012–9.
