# Supplementary material for: Evaluating the Cost-Utility of Continuous Glucose Monitoring in Individuals with Type 1 Diabetes: A Systematic Review of the Methods and Quality of Studies Using Decision Models or Empirical Data
Source: PubMed Central journal article supplement — Pharmacoeconomics. 2024 Jun 21;42(9):929–53. doi: 10.1007/s40273-024-01388-6 (PMC11343921; doi:10.1007/s40273-024-01388-6), 2024-06-21
Supplement: 40273_2024_1388_MOESM9_ESM.pdf [file 40273_2024_1388_MOESM9_ESM.pdf]

## Supplementary Information – Online Resource 9

Evaluating cost-utility of continuous glucose monitoring in individuals with type 1 diabetes: a systematic review of methods and quality of studies using decision models and/or empirical data.

de Jong LA<sup>1\*</sup> (ORCID ID: 0000-0001-8814-0670), Li X<sup>2</sup> (ORCID ID: 0000-0002-0225-6937), Emamipour S<sup>3</sup>, van der Werf S<sup>4</sup> (ORCID ID: 0000-0001-5856-7657), Postma MJ<sup>1,5</sup>, van Dijk PR<sup>6</sup> (ORCID ID: 0000-0002-9702-6551), Feenstra TL<sup>2</sup> (ORCID ID: 0000-0002-5788-0454)

<sup>1</sup> Department of Health Sciences, University Medical Center Groningen, University of Groningen, Groningen, the Netherlands

<sup>2</sup> Unit of Pharmacotherapy, -Epidemiology & -Economics, University of Groningen, Groningen Research Institute of Pharmacy (GRIP), Groningen, the Netherlands

<sup>3</sup> Department of Clinical Pharmacy and Pharmacology, University Medical Center Groningen, University of Groningen, Groningen, the Netherlands

<sup>4</sup> Central Medical Library, University Medical Center Groningen, University of Groningen, Groningen, the Netherlands

<sup>5</sup> Department of Economics, Econometrics and Finance, Faculty of Economics & Business, University of Groningen, Groningen, the Netherlands

<sup>6</sup> Department of Endocrinology. University Medical Center Groningen, University of Groningen, Groningen, The Netherlands

\*Corresponding author: [t.l.feenstra@rug.nl](mailto:t.l.feenstra@rug.nl)

Table 1. Diabetes-related complications included in the models.

| Publication (author year, country) | MI | Angina | CHF | Stroke | PVD | CHD/IHD | Neuropathy | Ulcer | Amputation | Retinopathy | Macular oedema | Cataract | Vision loss/blindness | Nephropathy | Microalbuminuria | Macroalbuminuria | Gross proteinuria | ESRD | Hypoglycemia | Ketoacidosis | Lactic acidosis | Depression | Edema |    |
|------------------------------------|----|--------|-----|--------|-----|---------|------------|-------|------------|-------------|----------------|----------|-----------------------|-------------|------------------|------------------|-------------------|------|--------------|--------------|-----------------|------------|-------|----|
| Wan 2018, US [1]                   | y  | y      | y   | y      | y   | n       | y          | y     | y          | y           | y              | y        | y                     | n           | y                | n                | y                 | y    | y            | y            | n               | y          | n     |    |
| Bilir 2018, Sweden [2]             | NR | NR     | NR  | NR     | NR  | NR      | NR         | NR    | NR         | NR          | NR             | NR       | NR                    | NR          | NR               | NR               | NR                | NR   | NR           | y            | NR              | NR         | NR    | NR |
| Chaugule 2017, Canada [3]          | y  | y      | y   | y      | y   | n       | y          | y     | y          | y           | y              | y        | n                     | y           | n                | n                | n                 | n    | y            | y            | y               | y          | y     | y  |
| Conget 2018, Spain [4]             | y  | y      | y   | y      | y   | n       | y          | y     | y          | y           | y              | y        | y                     | y           | y                | n                | y                 | y    | y            | y            | n               | y          | y     | y  |
| Gomez 2016, Colombia [5]           | y  | y      | y   | y      | n   | n       | y          | y     | y          | y           | y              | y        | y                     | n           | y                | n                | y                 | y    | y            | y            | n               | n          | n     | n  |
| Isitt 2022, Australia [6]          | y  | y      | y   | y      | y   | n       | y          | y     | y          | y           | n              | y        | y                     | n           | y                | n                | y                 | y    | y            | n            | n               | n          | n     | n  |
| Jendle 2017, Sweden [7]            | y  | y      | y   | y      | y   | n       | y          | y     | y          | y           | y              | y        | y                     | y           | y                | n                | y                 | y    | n            | n            | n               | n          | n     | n  |
| Jendle 2019, Sweden [8]            | y  | y      | y   | y      | y   | n       | y          | y     | y          | y           | y              | y        | y                     | y           | y                | n                | y                 | y    | y            | y            | n               | n          | n     | n  |
| Jendle 2021, Sweden [9]            | y  | y      | y   | y      | y   | n       | y          | y     | y          | n           | n              | y        | y                     | n           | n                | n                | n                 | n    | y            | y            | n               | n          | n     | n  |
| Kamble 2012, US [10]               | y  | y      | y   | y      | y   | n       | y          | y     | y          | y           | y              | y        | y                     | y           | y                | n                | y                 | y    | y            | y            | y               | y          | y     | y  |
| Lambadiari 2022, Greece [11]       | y  | y      | y   | y      | y   | n       | y          | y     | y          | y           | n              | y        | y                     | n           | y                | n                | y                 | y    | y            | n            | n               | n          | n     | n  |
| Nicolucci 2018, Italy [12]         | y  | y      | y   | y      | y   | n       | y          | y     | y          | y           | y              | y        | y                     | n           | y                | n                | y                 | y    | y            | n            | n               | n          | n     | y  |
| Riemsma 2016, UK [13]              | y  | y      | y   | y      | y   | n       | y          | y     | y          | y           | y              | y        | y                     | y           | y                | n                | y                 | n    | y            | y            | n               | y          | y     | y  |
| Roze 2015, Sweden [14]             | y  | y      | y   | y      | y   | n       | y          | y     | y          | y           | y              | y        | y                     | y           | n                | n                | n                 | y    | n            | n            | n               | n          | n     | n  |
| Roze 2016, France [15]             | y  | y      | y   | y      | y   | n       | y          | y     | y          | y           | y              | y        | y                     | y           | y                | n                | y                 | y    | y            | y            | y               | y          | y     | y  |
| Roze 2016, UK [16]                 | y  | y      | y   | y      | y   | n       | y          | y     | y          | y           | y              | y        | y                     | y           | y                | n                | y                 | y    | y            | y            | y               | y          | y     | y  |
| Roze 2017, Denmark [17]            | y  | y      | y   | y      | y   | n       | y          | y     | y          | y           | y              | y        | y                     | y           | n                | n                | y                 | y    | y            | y            | y               | n          | y     | y  |
| Roze 2019, The Netherlands [18]    | y  | y      | y   | y      | n   | n       | y          | y     | y          | y           | n              | y        | y                     | y           | n                | n                | y                 | n    | y            | y            | y               | n          | y     | y  |
| Roze 2019, Turkey [19]             | y  | y      | y   | y      | y   | n       | y          | y     | y          | y           | n              | y        | y                     | y           | n                | n                | y                 | n    | y            | y            | y               | n          | y     | y  |
| Roze 2020, UK [20]                 | y  | y      | y   | y      | y   | n       | y          | y     | y          | y           | y              | y        | n                     | y           | n                | n                | n                 | n    | y            | n            | n               | n          | n     | n  |
| Roze 2021, Canada [21]             | y  | y      | y   | y      | y   | n       | y          | y     | y          | y           | y              | y        | y                     | y           | y                | n                | y                 | n    | y            | n            | n               | n          | n     | n  |
| Roze 2021, UK [22]                 | y  | y      | y   | y      | y   | n       | y          | y     | y          | n           | n              | y        | y                     | y           | y                | n                | n                 | n    | y            | y            | n               | n          | n     | n  |

|                                                 |   |   |   |   |   |   |   |   |   |   |   |   |   |   |   |   |   |   |   |   |   |   |   |
|-------------------------------------------------|---|---|---|---|---|---|---|---|---|---|---|---|---|---|---|---|---|---|---|---|---|---|---|
| <b>Roze 2021, France [23]</b>                   | y | y | y | y | y | n | y | y | y | n | n | y | y | y | n | n | n | n | y | n | n | n | n |
| <b>Serné 2022, The Netherlands [24]</b>         | y | y | y | y | y | n | y | y | y | n | n | y | y | n | n | n | n | y | y | y | n | n | n |
| <b>Zhao 2021, China [25]</b>                    | y | y | y | y | y | n | y | y | y | y | y | y | y | n | y | n | y | n | y | y | n | n | n |
| <b>Garcia-Lorenzo 2018, Spain [26]</b>          | y | y | y | y | n | y | y | n | y | y | n | n | y | y | y | n | n | y | n | n | n | n | n |
| <b>Health Quality Ontario 2018, Canada [27]</b> | n | n | n | n | n | y | y | n | y | y | n | n | y | y | n | n | n | y | y | n | n | n | n |
| <b>Huang 2010, US [28]</b>                      | y | y | y | y | n | n | y | y | y | y | y | n | y | y | n | n | n | y | n | n | n | n | n |
| <b>McQueen 2011, US [29]</b>                    | y | y | y | y | n | y | y | n | y | y | y | n | y | y | n | n | n | y | n | n | n | n | n |
| <b>Pease 2020, Australia [30]</b>               | y | y | y | y | n | n | y | y | y | y | y | n | y | y | y | n | n | y | y | n | n | n | n |
| <b>Pease 2022, Australia [31]</b>               | y | y | y | y | n | n | n | y | y | y | n | n | y | y | y | y | n | y | y | n | n | n | n |
| <b>Rotondi 2022, Canada [32]</b>                | n | n | n | n | n | n | y | n | y | y | n | n | y | y | n | n | y | y | y | y | n | n | n |

Abbreviations: CHD, coronary heart disease; CHF, congestive heart failure; IHD, ischaemic heart disease; ESRD, end-stage renal disease; MI, myocardial infarction; NR, not reported.

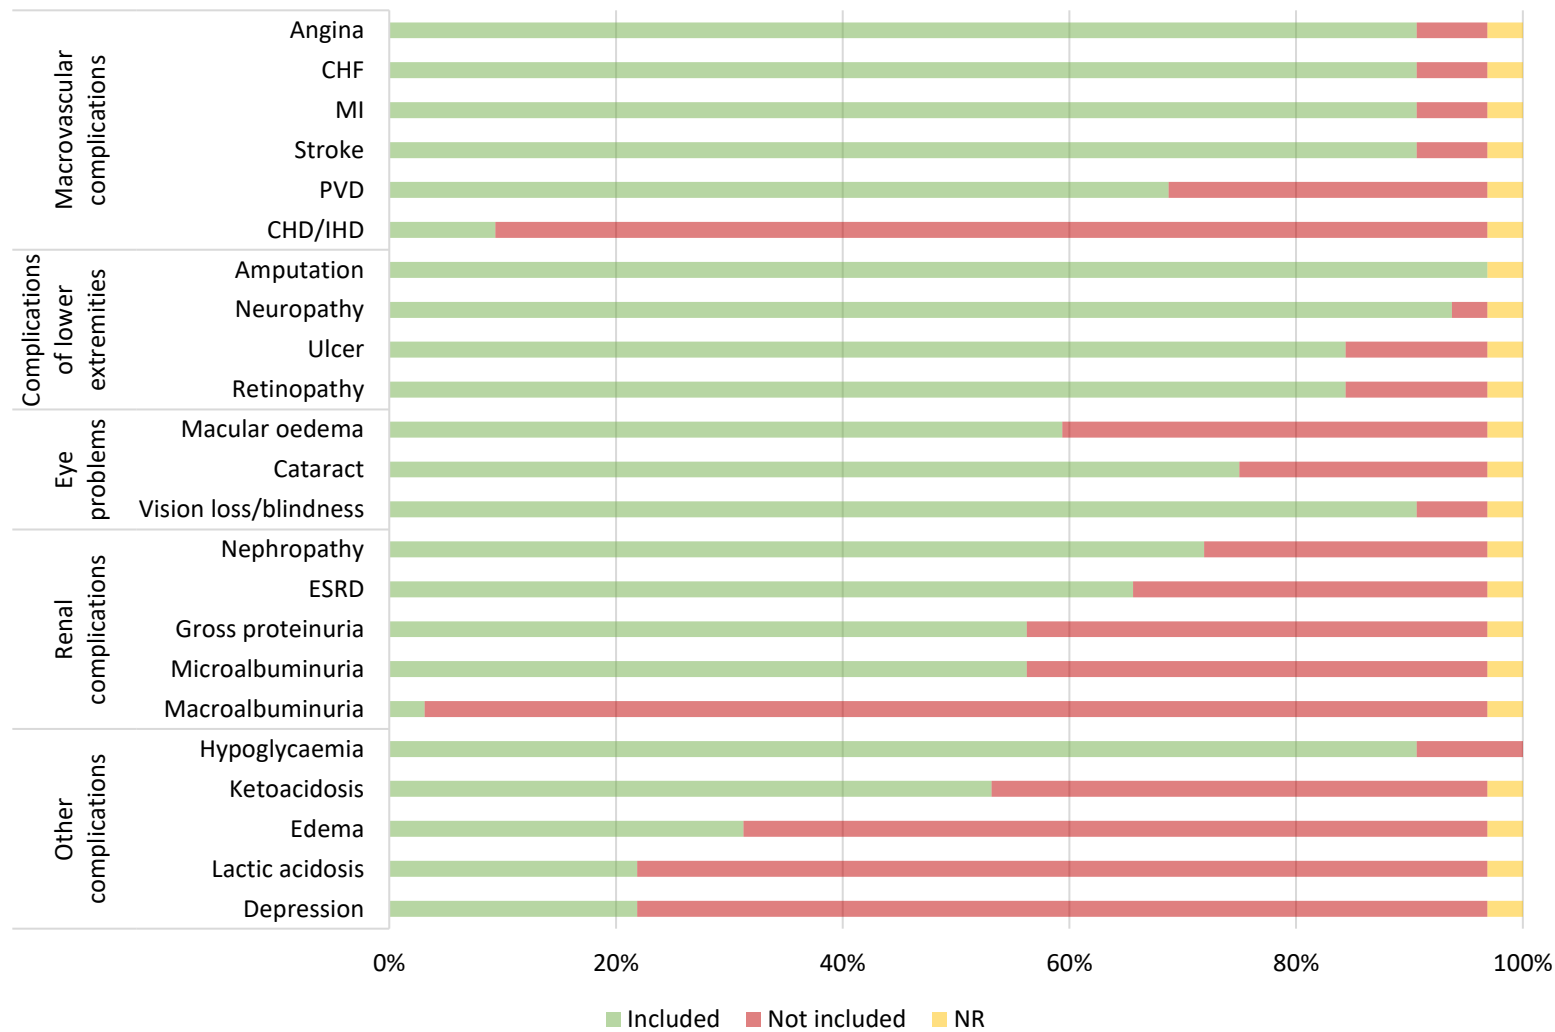

**Figure 1. Proportion of studies that included diabetes-related complications.** Abbreviations: CHD, coronary heart disease; CHF, congestive heart failure; IHD, ischemic heart disease; ESRD, end-stage renal disease; MI, myocardial infarction.

## References

1. Wan W, Skandari MR, Minc A, Nathan AG, Winn A, Zarei P, et al. Cost-effectiveness of Continuous Glucose Monitoring for Adults With Type 1 Diabetes Compared With Self-Monitoring of Blood Glucose: The DIAMOND Randomized Trial. *Diabetes Care*. 2018 Jun 1;41(6):1227–34.
2. Bilir SP, Hellmund R, Wehler B, Li H, Munakata J, Lamotte M. Cost-effectiveness Analysis of a Flash Glucose Monitoring System for Patients with Type 1 Diabetes Receiving Intensive Insulin Treatment in Sweden. *Eur Endocrinol*. 2018 Sep 1;14(2):73–9.
3. Chaugule S, Graham C. Cost-effectiveness of G5 Mobile continuous glucose monitoring device compared to self-monitoring of blood glucose alone for people with type 1 diabetes from the Canadian societal perspective. *J Med Econ*. 2017 Nov 2;20(11):1128–35.
4. Conget I, Martín-Vaquero P, Roze S, Elías I, Pineda C, Álvarez M, et al. Cost-effectiveness analysis of sensor-augmented pump therapy with low glucose-suspend in patients with type 1 diabetes mellitus and high risk of hypoglycemia in Spain. *Endocrinol Diabetes Nutr*. 2018 Aug 1;65(7):380–6.
5. Gomez AM, Alfonso-Cristancho R, Orozco JJ, Lynch PM, Prieto D, Saunders R, et al. Clinical and economic benefits of integrated pump/CGM technology therapy in patients with type 1 diabetes in Colombia. *Endocrinol Nutr*. 2016 Nov 1;63(9):466–74.
6. Isitt JJ, Roze S, Tilden D, Arora N, Palmer AJ, Jones T, Rentoul D, Lynch P. Long-term cost-effectiveness of Dexcom G6 real-time continuous glucose monitoring system in people with type 1 diabetes in Australia. *Diabet Med*. 2022 Jul;39(7):e14831.
7. Jendle J, Smith-Palmer J, Delbaere A, de Portu S, Papo N, Valentine W, et al. Cost-Effectiveness Analysis of Sensor-Augmented Insulin Pump Therapy with Automated Insulin Suspension Versus Standard Insulin Pump Therapy in Patients with Type 1 Diabetes in Sweden. *Diabetes Ther*. 2017 Oct 1;8(5):1015–30.
8. Jendle J, Pöhlmann J, De Portu S, Smith-Palmer J, Roze S. Cost-Effectiveness Analysis of the MiniMed 670G Hybrid Closed-Loop System Versus Continuous Subcutaneous Insulin Infusion for Treatment of Type 1 Diabetes. *Diabetes Technol Ther*. 2019 Mar 1;21(3):110–8.
9. Jendle J, Buompiersiere MI, Holm AL, de Portu S, Malkin SJP, Cohen O. The Cost-Effectiveness of an Advanced Hybrid Closed-Loop System in People with Type 1 Diabetes: a Health Economic Analysis in Sweden. *Diabetes Ther*. 2021 Nov 1;12(11):2977–91.
10. Kamble S, Schulman KA, Reed SD. Cost-effectiveness of sensor-augmented pump therapy in adults with type 1 diabetes in the United States. *Value Health*. 2012 Jul;15(5):632–8.
11. Lambadiari V, Ozdemir Saltik AZ, De Portu S, Buompiersiere MI, Kountouri A, Korakas E, et al. Cost-Effectiveness Analysis of an Advanced Hybrid Closed-Loop Insulin Delivery System in People with Type 1 Diabetes in Greece. *Diabetes Technol Ther*. 2022 May 1;24(5):316–23.
12. Nicolucci A, Rossi MC, D'Ostilio D, Delbaere A, de Portu S, Roze S. Cost-effectiveness of sensor-augmented pump therapy in two different patient populations with type 1 diabetes in Italy. *Nutr Metab Cardiovasc Dis*. 2018 Jul 1;28(7):707–15.
13. Riemsma R, Ramos IC, Birnie R, Büyükkaramikli N, Armstrong N, Ryder S, et al. Integrated sensor-augmented pump therapy systems [the MiniMed® Paradigm™ Veo system and the Vibe™ and G4® PLATINUM CGM (continuous glucose monitoring) system] for managing blood glucose levels in type 1 diabetes: a systematic review and economic evaluation. *Health Technol Assess*. 2016 Feb 1;20(17):1–252.
14. Roze S, Saunders R, Brandt AS, de Portu S, Papo NL, Jendle J. Health-economic analysis of real-time continuous glucose monitoring in people with Type 1 diabetes. *Diabet Med*. 2015 May 1;32(5):618–26.
15. Roze S, Smith-Palmer J, Valentine W, Payet V, De Portu S, Papo N, et al. Cost-Effectiveness of Sensor-Augmented Pump Therapy with Low Glucose Suspend Versus Standard Insulin Pump Therapy in Two Different Patient Populations with Type 1 Diabetes in France. *Diabetes Technol Ther*. 2016 Feb 1;18(2):75–84.

16. Roze S, Smith-Palmer J, Valentine WJ, Cook M, Jethwa M, De Portu S, et al. Long-term health economic benefits of sensor-augmented pump therapy vs continuous subcutaneous insulin infusion alone in type 1 diabetes: a U.K. perspective. *J Med Econ*. 2016 Mar 3;19(3):236–42.
17. Roze S, de Portu S, Smith-Palmer J, Delbaere A, Valentine W, Ridderstråle M. Cost-effectiveness of sensor-augmented pump therapy versus standard insulin pump therapy in patients with type 1 diabetes in Denmark. *Diabetes Res Clin Pract*. 2017 Jun 1;128:6–14.
18. Roze S, Smith-Palmer J, De Portu S, Delbaere A, De Brouwer B, De Valk HW. Cost-effectiveness of sensor-augmented insulin pump therapy vs continuous subcutaneous insulin infusion in patients with type 1 diabetes in the Netherlands. *Clinicoecon Outcomes Res*. 2019;11:73–82.
19. Roze S, Smith-Palmer J, De Portu S, Özdemir Saltik AZ, Akgül T, Deyneli O. Cost-Effectiveness of Sensor-Augmented Insulin Pump Therapy Versus Continuous Insulin Infusion in Patients with Type 1 Diabetes in Turkey. *Diabetes Technol Ther*. 2019 Dec 1;21(12):727–35.
20. Roze S, Isitt J, Smith-Palmer J, Javanbakht M, Lynch P. Long-term Cost-Effectiveness of Dexcom G6 Real-time Continuous Glucose Monitoring Versus Self-Monitoring of Blood Glucose in Patients With Type 1 Diabetes in the U.K. *Diabetes Care*. 2020 Oct 1;43(10):2411–7.
21. Roze S, Isitt JJ, Smith-Palmer J, Lynch P. Evaluation of the Long-Term Cost-Effectiveness of the Dexcom G6 Continuous Glucose Monitor versus Self-Monitoring of Blood Glucose in People with Type 1 Diabetes in Canada. *Clinicoecon Outcomes Res*. 2021;13:717–25.
22. Roze S, Buompiensiere MI, Ozdemir Z, de Portu S, Cohen O. Cost-effectiveness of a novel hybrid closed-loop system compared with continuous subcutaneous insulin infusion in people with type 1 diabetes in the UK. *J Med Econ*. 2021;24(1):883–90.
23. Roze S, Isitt JJ, Smith-Palmer J, Lynch P, Klinkenbijn B, Zammit G, et al. Long-Term Cost-Effectiveness the Dexcom G6 Real-Time Continuous Glucose Monitoring System Compared with Self-Monitoring of Blood Glucose in People with Type 1 Diabetes in France. *Diabetes Ther*. 2021 Jan 1;12(1):235–46.
24. Serné EH, Roze S, Buompiensiere MI, Valentine WJ, De Portu S, de Valk HW. Cost-Effectiveness of Hybrid Closed Loop Insulin Pumps Versus Multiple Daily Injections Plus Intermittently Scanned Glucose Monitoring in People With Type 1 Diabetes in The Netherlands. *Adv Ther*. 2022 Apr 1;39(4):1844–56.
25. Zhao X, Ming J, Qu S, Li HJ, Wu J, Ji L, et al. Cost-Effectiveness of Flash Glucose Monitoring for the Management of Patients with Type 1 and Patients with Type 2 Diabetes in China. *Diabetes Ther*. 2021 Dec 1;12(12):3079–92.
26. García-Lorenzo B, Rivero-Santana A, Vallejo-Torres L, Castilla-Rodríguez I, García-Pérez S, García-Pérez L, et al. Cost-effectiveness analysis of real-time continuous monitoring glucose compared to self-monitoring of blood glucose for diabetes mellitus in Spain. *J Eval Clin Pract*. 2018 Aug 1;24(4):772–81.
27. Health Quality Ontario. Continuous Monitoring of Glucose for Type 1 Diabetes: A Health Technology Assessment. *Ont Health Technol Assess Ser*. 2018 Feb 21;18(2):1-160.
28. Huang ES, O’Grady M, Basu A, Winn A, John P, Lee J, et al. The cost-effectiveness of continuous glucose monitoring in type 1 diabetes. *Diabetes Care*. 2010 Jun;33(6):1269–74.
29. McQueen RB, Ellis SL, Campbell JD, Nair K V., Sullivan PW. Cost-effectiveness of continuous glucose monitoring and intensive insulin therapy for type 1 diabetes. *Cost Eff Resour Alloc*. 2011 Sep 14;9.
30. Pease A, Zomer E, Liew D, Earnest A, Soldatos G, Ademi Z, et al. Cost-Effectiveness Analysis of a Hybrid Closed-Loop System Versus Multiple Daily Injections and Capillary Glucose Testing for Adults with Type 1 Diabetes. *Diabetes Technol Ther*. 2020 Nov 1;22(11):812–21.
31. Pease A, Callander E, Zomer E, Abraham MB, Davis EA, Jones TW, et al. The Cost of Control: Cost-effectiveness Analysis of Hybrid Closed-Loop Therapy in Youth. *Diabetes Care*. 2022 Sep 1;45(9):1971–80.
32. Rotondi MA, Wong O, Riddell M, Perkins B. Population-Level Impact and Cost-effectiveness of Continuous Glucose Monitoring and Intermittently Scanned Continuous Glucose Monitoring Technologies for Adults With Type 1 Diabetes in Canada: A Modeling Study. *Diabetes Care*. 2022 Sep 1;45(9):2012–9.
