# Supplementary material for: Evaluating the Cost-Utility of Continuous Glucose Monitoring in Individuals with Type 1 Diabetes: A Systematic Review of the Methods and Quality of Studies Using Decision Models or Empirical Data
Source: PubMed Central journal article supplement — Pharmacoeconomics. 2024 Jun 21;42(9):929–53. doi: 10.1007/s40273-024-01388-6 (PMC11343921; doi:10.1007/s40273-024-01388-6), 2024-06-21
Supplement: 40273_2024_1388_MOESM10_ESM.pdf [file 40273_2024_1388_MOESM10_ESM.pdf]

## Supplementary Information – Online Resource 10

Evaluating cost-utility of continuous glucose monitoring in individuals with type 1 diabetes: a systematic review of methods and quality of studies using decision models and/or empirical data.

de Jong LA<sup>1\*</sup> (ORCID ID: 0000-0001-8814-0670), Li X<sup>2</sup> (ORCID ID: 0000-0002-0225-6937), Emamipour S<sup>3</sup>, van der Werf S<sup>4</sup> (ORCID ID: 0000-0001-5856-7657), Postma MJ<sup>1,5</sup>, van Dijk PR<sup>6</sup> (ORCID ID: 0000-0002-9702-6551), Feenstra TL<sup>2</sup> (ORCID ID: 0000-0002-5788-0454)

<sup>1</sup> Department of Health Sciences, University Medical Center Groningen, University of Groningen, Groningen, the Netherlands

<sup>2</sup> Unit of Pharmacotherapy, -Epidemiology & -Economics, University of Groningen, Groningen Research Institute of Pharmacy (GRIP), Groningen, the Netherlands

<sup>3</sup> Department of Clinical Pharmacy and Pharmacology, University Medical Center Groningen, University of Groningen, Groningen, the Netherlands

<sup>4</sup> Central Medical Library, University Medical Center Groningen, University of Groningen, Groningen, the Netherlands

<sup>5</sup> Department of Economics, Econometrics and Finance, Faculty of Economics & Business, University of Groningen, Groningen, the Netherlands

<sup>6</sup> Department of Endocrinology. University Medical Center Groningen, University of Groningen, Groningen, The Netherlands

\*Corresponding author: [t.l.feenstra@rug.nl](mailto:t.l.feenstra@rug.nl)

**Table 1. Study population of included studies.**

| Publication (author year, country)         | Patient population                                                                                                                 | Source of baseline clinical characteristics                                                              | Age (years)                          | %men                                             | Baseline HbA1C                      | Duration of disease (years)        | BMI                        |
|--------------------------------------------|------------------------------------------------------------------------------------------------------------------------------------|----------------------------------------------------------------------------------------------------------|--------------------------------------|--------------------------------------------------|-------------------------------------|------------------------------------|----------------------------|
| <b>Emamipour 2022, The Netherlands [1]</b> | Adults with T1D                                                                                                                    | Observational study (FLARE-NL4 study, [2])                                                               | 45.6                                 | 50.7%                                            | 7.8%                                | NR                                 | NR                         |
| <b>Ly 2014, Australia [3]</b>              | Children, adolescents and adults with T1D                                                                                          | Based on the RCT itself                                                                                  | 18.6                                 | 42.9% (CSII); 56.5% (SAP)                        | 7.4% (CSII); 7.6% (SAP)             | 11.0                               | NR                         |
| <b>Wan 2018, US [4]</b>                    | Adults with T1D who had elevated HbA1c levels while using MDI                                                                      | RCT (DIAMOND trial, [5])                                                                                 | 51.4 (control); 45.7 (CGM)           | 77.0% (control); 53.0% (CGM)                     | 8.6% (control); 8.6% (CGM)          | 23.1 (control); 19.6 (CGM)         | 26.8 (control); 27.9 (CGM) |
| <b>Bilir 2018, Sweden [6]</b>              | Adults with well-controlled T1D (HbA1c ≤7.5%) using MDI insulin therapy or CSII and testing glucose levels at least 10 times/week. | RCT (IMPACT trial, [7])                                                                                  | 43.7                                 | 56.9%                                            | 6.8%                                | 22.0                               | 25.0                       |
| <b>Chaugule 2017, Canada [8]</b>           | Adults with T1D who had elevated HbA1c levels while using MDI                                                                      | RCT (DIAMOND trial, [5])                                                                                 | 46.0                                 | 53.0%                                            | 8.6%                                | 19.0                               | NR                         |
| <b>Conget 2018, Spain [9]</b>              | Individuals with T1D at a high risk of hypoglycemia                                                                                | Unclear                                                                                                  | 18.6                                 | 50.0%                                            | 7.5%                                | 12.0                               | NR                         |
| <b>Gomez 2016, Colombia [10]</b>           | Individuals with T1D older than 11 years                                                                                           | Observational study (Gómez 2013, [11])                                                                   | 34.2                                 | 53.5%                                            | 9.0%                                | 14.0                               | 23.7                       |
| <b>Isitt 2022, Australia [12]</b>          | Adults with T1D who had elevated HbA1c levels while using MDI                                                                      | RCT (DIAMOND trial, [5])                                                                                 | 47.6                                 | 56.0%                                            | 8.6%                                | 20.3                               | 27.5                       |
| <b>Jendle 2017, Sweden [13]</b>            | Individuals with T1D: 1) with increased risk of hypoglycemia; 2) with uncontrolled HbA1c at baseline                               | 1) RCT (Ly 2013, [14]); 2) register (Swedish National Diabetes Register[15]; supplemented by DCCT, [16]) | 1) 17.4 (SAP) & 19.7 (CSII); 2) 46.0 | Cohort 1: SAP 56.5% & CSII 42.9% Cohort 2: 55.7% | 1) 7.6% (SAP); 7.4% (CSII); 2) 7.9% | 1) 9.8 (SAP); 12.1 (CSII); 2) 24.0 | NR                         |
| <b>Jendle 2019, Sweden [17]</b>            | Individuals with T1D aged 14–75 years who had been using CSII with or without CGM for >6 months.                                   | Single-arm non-randomized trial (Bergental 2016, [18])                                                   | 37.8                                 | 44.4%                                            | 7.4%                                | 21.7                               | NR                         |
| <b>Jendle 2021, Sweden [19]</b>            | Individuals with T1D for >3 months                                                                                                 | RCT (FUTURE study, [20])                                                                                 | 48.8                                 | 53.9%                                            | 7.8%                                | 22.8                               | NR                         |

|                                        |                                                                                                                                       |                                                                                                                                    |                                                           |                                                             |                                                           |                                                           |      |
|----------------------------------------|---------------------------------------------------------------------------------------------------------------------------------------|------------------------------------------------------------------------------------------------------------------------------------|-----------------------------------------------------------|-------------------------------------------------------------|-----------------------------------------------------------|-----------------------------------------------------------|------|
| <b>Kamble 2012, US [21]</b>            | Adults with inadequately controlled T1D                                                                                               | RCT (STAR 3 study, [22])                                                                                                           | 41.2                                                      | 56.8%                                                       | 8.3%                                                      | 20.2                                                      | 27.9 |
| <b>Lambadiari 2022, Greece [23]</b>    | Individuals with T1D                                                                                                                  | AHCL vs SAP plus PLGM: RCT (MiniMed 780G US pivotal trial, [24]); AHCL vs MDI plus isCGM: observational study (FUTURE study, [20]) | AHCL vs SAP plus PLGM: 38.3; AHCL vs MDI plus isCGM: 45.8 | AHCL vs SAP plus PLGM: 45.2%; AHCL vs MDI plus isCGM: 53.9% | AHCL vs SAP plus PLGM: 7.5%; AHCL vs MDI plus isCGM: 7.8% | AHCL vs SAP plus PLGM: 23.0; AHCL vs MDI plus isCGM: 22.8 | NR   |
| <b>Nicolucci 2018, Italy [25]</b>      | Individuals with T1D: 1) at increased risk of hypoglycemia; 2) with uncontrolled HbA1c                                                | 1) RCT (Ly 2013, [14]); 2) meta-analysis (Pickup 2011, [26])                                                                       | 1) 17.4 (control); 19.7 (intervention); 2) 27.0           | 1) 56.5% (control); 42.9% (intervention); 2) 48.5%          | 1) 7.6% (control); 7.4% (intervention); 2) 8.1%           | 1) 9.8 (control); 12.1 (intervention); 2) 13.2            | NR   |
| <b>Riemsma 2016, UK [27]</b>           | Individuals with T1D who are eligible for an insulin pump                                                                             | Single-arm non-randomized trial (Bergenstal 2016, [18]) supplemented by various sources.                                           | 41.6                                                      | 38.0%                                                       | 7.3%                                                      | 27.1                                                      | 27.6 |
| <b>Roze 2015, Sweden [28]</b>          | Individuals with T1D                                                                                                                  | Meta-analysis (Pickup 2011, [26])                                                                                                  | 27.0                                                      | 45.5%                                                       | 8.6%                                                      | 13.0                                                      | 23.8 |
| <b>Roze 2016, France [29]</b>          | Individuals with T1D: 1) with an elevated risk for hypoglycemia due to impaired awareness of hypoglycemia; 2) with uncontrolled HbA1c | 1) RCT (Ly 2013, [14]); 2) RCT (Riveline 2012, [30])                                                                               | 36.0                                                      | 53.0%                                                       | 9.0%                                                      | 17.0                                                      | 25.0 |
| <b>Roze 2016, UK [31]</b>              | Individuals with T1D with poor glycemic control                                                                                       | Meta-analysis (Pickup 2011, [26])                                                                                                  | 27.0                                                      | 48.5%                                                       | 10.0%                                                     | 13.0                                                      | NR   |
| <b>Roze 2017, Denmark [32]</b>         | Individuals with T1D: 1) with hyperglycemia at baseline; 2) with an increased risk for hypoglycemia                                   | 1) meta-analysis (Pickup 2011, [26]); 2) RCT (Ly 2013, [14])                                                                       | 1) 27; 2) 18.6                                            | 1) 48.5%; 2) 49.5%                                          | 1) 8.1%; 2) 7.5%                                          | 1) 13.2; 2) 11.0                                          | NR   |
| <b>Roze 2019, The Netherlands [33]</b> | Individuals with T1D: 1) with hyperglycemia at baseline; 2) with an increased risk for hypoglycemia                                   | 1) meta-analysis (Pickup 2011, [26]) supplemented by DCCT, [16]); 2) RCT (Ly 2013, [14])                                           | 1) 27.0; 2) 18.6                                          | 1) 48.5%; 2) 49.5%                                          | 1) 8.0%; 2) 7.5%                                          | 1) 13.2; 2) 11.1                                          | NR   |
| <b>Roze 2019, Turkey [34]</b>          | Individuals with T1D: 1) with poor glycemic control at baseline; 2) at increased risk for hypoglycemia                                | 1) meta-analysis (Pickup JC 2011, [26]); 2) RCT (Ly 2013, [14])                                                                    | 1) 27.0; 2) 18.7                                          | 1) 48.5%; 2) 49.5%                                          | 1) 9.0%; 2) 7.5%                                          | 1) 13.2; 2) 11.2                                          | NR   |

|                                                 |                                                                                                                                                                      |                                                                      |                                                                                                    |                                                                                                        |                                                                                                   |                                                                                                    |      |
|-------------------------------------------------|----------------------------------------------------------------------------------------------------------------------------------------------------------------------|----------------------------------------------------------------------|----------------------------------------------------------------------------------------------------|--------------------------------------------------------------------------------------------------------|---------------------------------------------------------------------------------------------------|----------------------------------------------------------------------------------------------------|------|
| <b>Roze 2020, UK [35]</b>                       | Individuals with T1D: 1) reflecting the DIAMOND trial T1D population; 2) reflecting the DIAMOND trial T1D population with baseline HbA1c at least 8.5% (69 mmol/mol) | RCT (DIAMOND trial, [5])                                             | 1) 48.0; 2) 46.0                                                                                   | NR                                                                                                     | 1) 8.6%; 2) 9.1%                                                                                  | 20.0                                                                                               | NR   |
| <b>Roze 2021, Canada [36]</b>                   | Adults with T1D                                                                                                                                                      | RCT (DIAMOND trial, [5])                                             | 47.6                                                                                               | 56.0%                                                                                                  | 8.6%                                                                                              | 20.3                                                                                               | 27.5 |
| <b>Roze 2021, UK [37]</b>                       | Adults and adolescents with T1D                                                                                                                                      | RCT (DIAMOND trial, [5])                                             | 47.6                                                                                               | 56.0%                                                                                                  | 8.6%                                                                                              | 20.3                                                                                               | 27.5 |
| <b>Roze 2021, France [38]</b>                   | Adults with T1D                                                                                                                                                      | Single-arm non-randomized trial (Garg 2017/Bergenstal 2016, [18,39]) | 37.8                                                                                               | 44.4%                                                                                                  | 7.4%                                                                                              | 21.7                                                                                               | NR   |
| <b>Serné 2022, The Netherlands [40]</b>         | Individuals with T1D                                                                                                                                                 | RCT (FUTURE study, [20])                                             | 45.8                                                                                               | 54.0%                                                                                                  | 7.8%                                                                                              | 22.8                                                                                               | NR   |
| <b>Zhao 2021, China [41]</b>                    | Individuals with T1D and treated by insulin                                                                                                                          | Epidemiological studies (Zhou 2020 and Tang 2019, [42,43])           | 33.3                                                                                               | 55.6%                                                                                                  | 10.3%                                                                                             | 0.0                                                                                                | 21.4 |
| <b>Garcia-Lorenzo 2018, Spain [44]</b>          | Individuals with T1D without complications at baseline.                                                                                                              | Meta-analysis conducted for the purpose of the study                 | 26.0                                                                                               | NR                                                                                                     | NR                                                                                                | NR                                                                                                 | NR   |
| <b>Health Quality Ontario 2018, Canada [45]</b> | Individuals with T1D                                                                                                                                                 | RCT (DCCT, [16])                                                     | 27.0                                                                                               | NR                                                                                                     | 8.8%                                                                                              | 6.0                                                                                                | NR   |
| <b>Huang 2010, US [46]</b>                      | Individuals with T1D with HbA1c level of $\leq 10.0\%$ who are currently on CSII or MDI.                                                                             | RCT (Juvenile Diabetes Research Foundation-CGM trials, [47])         | HbA1C $\geq 7.0\%$ : 44.7 (control) and 41.2 (CGM); HbA1C $<7.0\%$ : 31.8 (control) and 29.4 (CGM) | HbA1C $\geq 7.0\%$ : 74.0% (control) and 69.0% (CGM); HbA1C $<7.0\%$ : 67.0% (control) and 64.0% (CGM) | HbA1C $\geq 7.0\%$ : 7.6%(control) and 7.6% (CGM); HbA1C $<7.0\%$ : 6.5% (control) and 6.4% (CGM) | HbA1C $\geq 7.0\%$ : 21.8 (control) and 23.6 (CGM); HbA1C $<7.0\%$ : 18.2 (control) and 16.3 (CGM) | NR   |
| <b>McQueen 2011, US [48]</b>                    | Adults with T1D                                                                                                                                                      | RCT (Juvenile Diabetes Research Foundation-CGM trial, [47])          | 40.0                                                                                               | NR                                                                                                     | 7.6%                                                                                              | ~20.0                                                                                              | NR   |
| <b>Pease 2020, Australia [49]</b>               | Adults with T1D                                                                                                                                                      | Register (Australian National Diabetes Audit, [50])                  | 18.0                                                                                               | 46.7%                                                                                                  | 8.5%                                                                                              | 10.0                                                                                               | NR   |

|                                   |                                  |                          |      |       |                                  |     |    |
|-----------------------------------|----------------------------------|--------------------------|------|-------|----------------------------------|-----|----|
| <b>Pease 2022, Australia [51]</b> | Young people with T1D            | RCT (Abraham 2021, [52]) | 12.0 | 45.0% | 8.0% (age ≤21) or 8.5% (age >21) | 7.0 | NR |
| <b>Rotondi 2022, Canada [53]</b>  | Adults with T1D aged 18–64 years | NR                       | NR   | NR    | 8.1%                             | NR  | NR |

Abbreviations: BMI, body mass index; CGM, continuous glucose monitoring; CSII, continuous subcutaneous insulin infusion; DCCT, Diabetes Control and Complications Trial; isCGM, intermittently-scanned continuous glucose monitoring; MDI, multiple daily injections; NR, not reported; RCT, randomized controlled trial; rt-CGM, real-time continuous glucose monitoring; SAP, sensor-augmented pump; T1D, type 1 diabetes.

## References

1. Emamipour S, van Dijk PR, Bilo HJG, Edens MA, van der Galiën O, Postma MJ, et al. Personalizing the Use of a Intermittently Scanned Continuous Glucose Monitoring (isCGM) Device in Individuals With Type 1 Diabetes: A Cost-Effectiveness Perspective in the Netherlands (FLARE-NL 9). *J Diabetes Sci Technol*. 2022.
2. Fokkert M, Van Dijk P, Edens M, Barents E, Mollema J, Slingerland R, et al. Improved well-being and decreased disease burden after 1-year use of flash glucose monitoring (FLARE-NL4). *BMJ Open Diabetes Res Care*. 2019 Dec 9;7(1).
3. Ly TT, Brnabic AJM, Eggleston A, Kolivos A, McBride ME, Schrover R, et al. A cost-effectiveness analysis of sensor-augmented insulin pump therapy and automated insulin suspension versus standard pump therapy for hypoglycemic unaware patients with type 1 diabetes. *Value Health*. 2014;17(5):561–9.
4. Wan W, Skandari MR, Minc A, Nathan AG, Winn A, Zarei P, et al. Cost-effectiveness of Continuous Glucose Monitoring for Adults With Type 1 Diabetes Compared With Self-Monitoring of Blood Glucose: The DIAMOND Randomized Trial. *Diabetes Care*. 2018 Jun 1;41(6):1227–34.
5. Beck RW, Riddlesworth T, Ruedy K, Ahmann A, Bergenstal R, Haller S, et al. Effect of Continuous Glucose Monitoring on Glycemic Control in Adults With Type 1 Diabetes Using Insulin Injections: The DIAMOND Randomized Clinical Trial. *JAMA*. 2017 Jan 24;317(4):371–8.
6. Bilir SP, Hellmund R, Wehler B, Li H, Munakata J, Lamotte M. Cost-effectiveness Analysis of a Flash Glucose Monitoring System for Patients with Type 1 Diabetes Receiving Intensive Insulin Treatment in Sweden. *Eur Endocrinol*. 2018 Sep 1;14(2):73–9.
7. Bolinder J, Antuna R, Geelhoed-Duijvestijn P, Kröger J, Weitgasser R. Novel glucose-sensing technology and hypoglycaemia in type 1 diabetes: a multicentre, non-masked, randomised controlled trial. *Lancet*. 2016 Nov 5;388(10057):2254–63.
8. Chaugule S, Graham C. Cost-effectiveness of G5 Mobile continuous glucose monitoring device compared to self-monitoring of blood glucose alone for people with type 1 diabetes from the Canadian societal perspective. *J Med Econ*. 2017 Nov 2;20(11):1128–35.
9. Conget I, Martín-Vaquero P, Roze S, Elías I, Pineda C, Álvarez M, et al. Cost-effectiveness analysis of sensor-augmented pump therapy with low glucose-suspend in patients with type 1 diabetes mellitus and high risk of hypoglycemia in Spain. *Endocrinol Diabetes Nutr*. 2018 Aug 1;65(7):380–6.
10. Gomez AM, Alfonso-Cristancho R, Orozco JJ, Lynch PM, Prieto D, Saunders R, et al. Clinical and economic benefits of integrated pump/CGM technology therapy in patients with type 1 diabetes in Colombia. *Endocrinol Nutr*. 2016 Nov 1;63(9):466–74.
11. Gómez AM, Grizales AM, Veloza A, Marín A, Muñoz OM, Rondón MA. Factores asociados con el control glucémico óptimo en pacientes tratados con bomba de insulina y monitorización continua de glucosa en tiempo real. *Avances en Diabetología*. 2013 May 1;29(3):74–80.

12. Isitt JJ, Roze S. Long-term cost-effectiveness of Dexcom G6 real-time continuous glucose monitoring system in people with type 1 diabetes in Australia: Response to letter from Hellmund, Richard and Welsh, Zoe. *Diabet Med*. 2023 Feb 1;40(2).
13. Jendle J, Smith-Palmer J, Delbaere A, de Portu S, Papo N, Valentine W, et al. Cost-Effectiveness Analysis of Sensor-Augmented Insulin Pump Therapy with Automated Insulin Suspension Versus Standard Insulin Pump Therapy in Patients with Type 1 Diabetes in Sweden. *Diabetes Ther*. 2017 Oct 1;8(5):1015–30.
14. Ly TT, Nicholas JA, Retterath A, Lim EM, Davis EA, Jones TW. Effect of sensor-augmented insulin pump therapy and automated insulin suspension vs standard insulin pump therapy on hypoglycemia in patients with type 1 diabetes: a randomized clinical trial. *JAMA*. 2013 Sep 25;310(12):1240–7.
15. Swedish National Diabetes Register. Annual report [Internet]. 2013 [cited 2023 Oct 13]. Available from: [https://www.ndr.nu/pdfs/Annual\\_Report\\_NDR\\_2013.pdf](https://www.ndr.nu/pdfs/Annual_Report_NDR_2013.pdf)
16. DM N, PA C, JY B, SM G, JM L, TJ O, et al. Intensive diabetes treatment and cardiovascular disease in patients with type 1 diabetes. *N Engl J Med*. 2005 Dec 22;353(25):2643–53.
17. Jendle J, Pöhlmann J, De Portu S, Smith-Palmer J, Roze S. Cost-Effectiveness Analysis of the MiniMed 670G Hybrid Closed-Loop System Versus Continuous Subcutaneous Insulin Infusion for Treatment of Type 1 Diabetes. *Diabetes Technol Ther*. 2019 Mar 1;21(3):110–8.
18. Bergenstal RM, Garg S, Weinzimer SA, Buckingham BA, Bode BW, Tamborlane W V., et al. Safety of a Hybrid Closed-Loop Insulin Delivery System in Patients With Type 1 Diabetes. *JAMA*. 2016 Oct 4;316(13):1407–8.
19. Jendle J, Buompiersiere MI, Holm AL, de Portu S, Malkin SJP, Cohen O. The Cost-Effectiveness of an Advanced Hybrid Closed-Loop System in People with Type 1 Diabetes: a Health Economic Analysis in Sweden. *Diabetes Ther*. 2021 Nov 1;12(11):2977–91.
20. Charleer S, De Block C, Van Huffel L, Broos B, Fieuws S, Nobels F, et al. Quality of Life and Glucose Control After 1 Year of Nationwide Reimbursement of Intermittently Scanned Continuous Glucose Monitoring in Adults Living With Type 1 Diabetes (FUTURE): A Prospective Observational Real-World Cohort Study. *Diabetes Care*. 2020 Feb 1;43(2):389–97.
21. Kamble S, Schulman KA, Reed SD. Cost-effectiveness of sensor-augmented pump therapy in adults with type 1 diabetes in the United States. *Value Health*. 2012 Jul;15(5):632–8.
22. Davis SN, Horton ES, Battelino T, Rubin RR, Schulman KA, Tamborlane W V. STAR 3 randomized controlled trial to compare sensor-augmented insulin pump therapy with multiple daily injections in the treatment of type 1 diabetes: research design, methods, and baseline characteristics of enrolled subjects. *Diabetes Technol Ther*. 2010 Apr 1;12(4):249–55.
23. Lambadiari V, Ozdemir Saltik AZ, De Portu S, Buompiersiere MI, Kountouri A, Korakas E, et al. Cost-Effectiveness Analysis of an Advanced Hybrid Closed-Loop Insulin Delivery System in People with Type 1 Diabetes in Greece. *Diabetes Technol Ther*. 2022 May 1;24(5):316–23.
24. Carlson AL, Sherr JL, Shulman DI, Garg SK, Pop-Busui R, Bode BW, et al. Safety and Glycemic Outcomes During the MiniMed™ Advanced Hybrid Closed-Loop System Pivotal Trial in Adolescents and Adults with Type 1 Diabetes. *Diabetes Technol Ther*. 2022 Mar 1;24(3):178–89.
25. Nicolucci A, Rossi MC, D’Ostilio D, Delbaere A, de Portu S, Roze S. Cost-effectiveness of sensor-augmented pump therapy in two different patient populations with type 1 diabetes in Italy. *Nutr Metab Cardiovasc Dis*. 2018 Jul 1;28(7):707–15.
26. Pickup JC, Freeman SC, Sutton AJ. Glycaemic control in type 1 diabetes during real time continuous glucose monitoring compared with self monitoring of blood glucose: meta-analysis of randomised controlled trials using individual patient data. *BMJ*. 2011 Jul 16;343(7815).
27. Riemsma R, Ramos IC, Birnie R, Büyükkaramikli N, Armstrong N, Ryder S, et al. Integrated sensor-augmented pump therapy systems [the MiniMed® Paradigm™ Veo system and the Vibe™ and G4® PLATINUM CGM (continuous glucose monitoring) system] for managing blood glucose levels in type 1 diabetes: a systematic review and economic evaluation. *Health Technol Assess*. 2016 Feb 1;20(17):1–252.

28. Roze S, Saunders R, Brandt AS, de Portu S, Papo NL, Jendle J. Health-economic analysis of real-time continuous glucose monitoring in people with Type 1 diabetes. *Diabet Med*. 2015 May 1;32(5):618–26.
29. Roze S, Smith-Palmer J, Valentine W, Payet V, De Portu S, Papo N, et al. Cost-Effectiveness of Sensor-Augmented Pump Therapy with Low Glucose Suspend Versus Standard Insulin Pump Therapy in Two Different Patient Populations with Type 1 Diabetes in France. *Diabetes Technol Ther*. 2016 Feb 1;18(2):75–84.
30. Riveline JP, Schaepelynck P, Chaillous L, Renard E, Sola-Gazagnes A, Penfornis A, et al. Assessment of patient-led or physician-driven continuous glucose monitoring in patients with poorly controlled type 1 diabetes using basal-bolus insulin regimens: a 1-year multicenter study. *Diabetes Care*. 2012 May;35(5):965–71.
31. Roze S, Smith-Palmer J, Valentine WJ, Cook M, Jethwa M, De Portu S, et al. Long-term health economic benefits of sensor-augmented pump therapy vs continuous subcutaneous insulin infusion alone in type 1 diabetes: a U.K. perspective. *J Med Econ*. 2016 Mar 3;19(3):236–42.
32. Roze S, de Portu S, Smith-Palmer J, Delbaere A, Valentine W, Ridderstråle M. Cost-effectiveness of sensor-augmented pump therapy versus standard insulin pump therapy in patients with type 1 diabetes in Denmark. *Diabetes Res Clin Pract*. 2017 Jun 1;128:6–14.
33. Roze S, Smith-Palmer J, De Portu S, Delbaere A, De Brouwer B, De Valk HW. Cost-effectiveness of sensor-augmented insulin pump therapy vs continuous subcutaneous insulin infusion in patients with type 1 diabetes in the Netherlands. *Clinicoecon Outcomes Res*. 2019;11:73–82.
34. Roze S, Smith-Palmer J, De Portu S, Özdemir Saltik AZ, Akgül T, Deyneli O. Cost-Effectiveness of Sensor-Augmented Insulin Pump Therapy Versus Continuous Insulin Infusion in Patients with Type 1 Diabetes in Turkey. *Diabetes Technol Ther*. 2019 Dec 1;21(12):727–35.
35. Roze S, Isitt J, Smith-Palmer J, Javanbakht M, Lynch P. Long-term Cost-Effectiveness of Dexcom G6 Real-time Continuous Glucose Monitoring Versus Self-Monitoring of Blood Glucose in Patients With Type 1 Diabetes in the U.K. *Diabetes Care*. 2020 Oct 1;43(10):2411–7.
36. Roze S, Isitt JJ, Smith-Palmer J, Lynch P. Evaluation of the Long-Term Cost-Effectiveness of the Dexcom G6 Continuous Glucose Monitor versus Self-Monitoring of Blood Glucose in People with Type 1 Diabetes in Canada. *Clinicoecon Outcomes Res*. 2021;13:717–25.
37. Roze S, Buompensiere MI, Ozdemir Z, de Portu S, Cohen O. Cost-effectiveness of a novel hybrid closed-loop system compared with continuous subcutaneous insulin infusion in people with type 1 diabetes in the UK. *J Med Econ*. 2021;24(1):883–90.
38. Roze S, Isitt JJ, Smith-Palmer J, Lynch P, Klinkenbijn B, Zammit G, et al. Long-Term Cost-Effectiveness the Dexcom G6 Real-Time Continuous Glucose Monitoring System Compared with Self-Monitoring of Blood Glucose in People with Type 1 Diabetes in France. *Diabetes Ther*. 2021 Jan 1;12(1):235–46.
39. Garg SK, Weinzimer SA, Tamborlane W V., Buckingham BA, Bode BW, Bailey TS, et al. Glucose Outcomes with the In-Home Use of a Hybrid Closed-Loop Insulin Delivery System in Adolescents and Adults with Type 1 Diabetes. *Diabetes Technol Ther*. 2017 Mar 1;19(3):155–63.
40. Serné EH, Roze S, Buompensiere MI, Valentine WJ, De Portu S, de Valk HW. Cost-Effectiveness of Hybrid Closed Loop Insulin Pumps Versus Multiple Daily Injections Plus Intermittently Scanned Glucose Monitoring in People With Type 1 Diabetes in The Netherlands. *Adv Ther*. 2022 Apr 1;39(4):1844–56.
41. Zhao X, Ming J, Qu S, Li HJ, Wu J, Ji L, et al. Cost-Effectiveness of Flash Glucose Monitoring for the Management of Patients with Type 1 and Patients with Type 2 Diabetes in China. *Diabetes Ther*. 2021 Dec 1;12(12):3079–92.
42. Tang X, Yan X, Zhou H, Yang X, Niu X, Liu J, et al. Prevalence and identification of type 1 diabetes in Chinese adults with newly diagnosed diabetes. *Diabetes Metab Syndr Obes*. 2019;12:1527–41.
43. Zhou X, Wang X, An Y, Su Q, Li B, Chen H. Characteristics of type 1 diabetes patients aged 60 and older in Shanghai. *Journal of Endocrine Disorders*. 2020;6(2):1039.
44. García-Lorenzo B, Rivero-Santana A, Vallejo-Torres L, Castilla-Rodríguez I, García-Pérez S, García-Pérez L, et al. Cost-effectiveness analysis of real-time continuous monitoring glucose compared to self-monitoring of blood glucose for diabetes mellitus in Spain. *J Eval Clin Pract*. 2018 Aug 1;24(4):772–81.

45. Health Quality Ontario. Continuous Monitoring of Glucose for Type 1 Diabetes: A Health Technology Assessment. *Ont Health Technol Assess Ser.* 2018 Feb 21;18(2):1-160. eCollection 2018.
46. Huang ES, O'Grady M, Basu A, Winn A, John P, Lee J, et al. The cost-effectiveness of continuous glucose monitoring in type 1 diabetes. *Diabetes Care.* 2010 Jun;33(6):1269–74.
47. WV T, RW B, BW B, B B, HP C, R C, et al. Continuous glucose monitoring and intensive treatment of type 1 diabetes. *N Engl J Med.* 2008 Oct 2;359(14):1464–76.
48. McQueen RB, Ellis SL, Campbell JD, Nair K V., Sullivan PW. Cost-effectiveness of continuous glucose monitoring and intensive insulin therapy for type 1 diabetes. *Cost Eff Resour Alloc.* 2011 Sep 14;9.
49. Pease A, Zomer E, Liew D, Earnest A, Soldatos G, Ademi Z, et al. Cost-Effectiveness Analysis of a Hybrid Closed-Loop System Versus Multiple Daily Injections and Capillary Glucose Testing for Adults with Type 1 Diabetes. *Diabetes Technol Ther.* 2020 Nov 1;22(11):812–21.
50. Pease A, Earnest A, Ranasinha S, Nanayakkara N, Liew D, Wischer N, et al. Burden of cardiovascular risk factors and disease among patients with type 1 diabetes: results of the Australian National Diabetes Audit (ANDA). *Cardiovasc Diabetol.* 2018 Jun 2;17(1).
51. Pease A, Callander E, Zomer E, Abraham MB, Davis EA, Jones TW, et al. The Cost of Control: Cost-effectiveness Analysis of Hybrid Closed-Loop Therapy in Youth. *Diabetes Care.* 2022 Sep 1;45(9):1971–80.
52. Abraham MB, De Bock M, Smith GJ, Dart J, Fairchild JM, King BR, et al. Effect of a Hybrid Closed-Loop System on Glycemic and Psychosocial Outcomes in Children and Adolescents With Type 1 Diabetes: A Randomized Clinical Trial. *JAMA Pediatr.* 2021;175(12).
53. Rotondi MA, Wong O, Riddell M, Perkins B. Population-Level Impact and Cost-effectiveness of Continuous Glucose Monitoring and Intermittently Scanned Continuous Glucose Monitoring Technologies for Adults With Type 1 Diabetes in Canada: A Modeling Study. *Diabetes Care.* 2022 Sep 1;45(9):2012–9.
