# Supplementary material for: Evaluating the Cost-Utility of Continuous Glucose Monitoring in Individuals with Type 1 Diabetes: A Systematic Review of the Methods and Quality of Studies Using Decision Models or Empirical Data
Source: PubMed Central journal article supplement — Pharmacoeconomics. 2024 Jun 21;42(9):929–53. doi: 10.1007/s40273-024-01388-6 (PMC11343921; doi:10.1007/s40273-024-01388-6), 2024-06-21
Supplement: 40273_2024_1388_MOESM11_ESM.pdf [file 40273_2024_1388_MOESM11_ESM.pdf]

## Supplementary Information – Online Resource 11

Evaluating cost-utility of continuous glucose monitoring in individuals with type 1 diabetes: a systematic review of methods and quality of studies using decision models and/or empirical data.

de Jong LA<sup>1\*</sup> (ORCID ID: 0000-0001-8814-0670), Li X<sup>2</sup> (ORCID ID: 0000-0002-0225-6937), Emamipour S<sup>3</sup>, van der Werf S<sup>4</sup> (ORCID ID: 0000-0001-5856-7657), Postma MJ<sup>1,5</sup>, van Dijk PR<sup>6</sup> (ORCID ID: 0000-0002-9702-6551), Feenstra TL<sup>2</sup> (ORCID ID: 0000-0002-5788-0454)

<sup>1</sup> Department of Health Sciences, University Medical Center Groningen, University of Groningen, Groningen, the Netherlands

<sup>2</sup> Unit of Pharmacotherapy, -Epidemiology & -Economics, University of Groningen, Groningen Research Institute of Pharmacy (GRIP), Groningen, the Netherlands

<sup>3</sup> Department of Clinical Pharmacy and Pharmacology, University Medical Center Groningen, University of Groningen, Groningen, the Netherlands

<sup>4</sup> Central Medical Library, University Medical Center Groningen, University of Groningen, Groningen, the Netherlands

<sup>5</sup> Department of Economics, Econometrics and Finance, Faculty of Economics & Business, University of Groningen, Groningen, the Netherlands

<sup>6</sup> Department of Endocrinology. University Medical Center Groningen, University of Groningen, Groningen, The Netherlands

\*Corresponding author: [t.l.feenstra@rug.nl](mailto:t.l.feenstra@rug.nl)

**Table 1. Cost items included in the studies.**

| Publication (author year, country)  | Treatment costs included? | Complication-related costs included? | Productivity losses included? | Method used for productivity losses | Other indirect or direct non-medical costs included? | Type of other indirect or direct non-medical costs included              |
|-------------------------------------|---------------------------|--------------------------------------|-------------------------------|-------------------------------------|------------------------------------------------------|--------------------------------------------------------------------------|
| Emamipour 2022, The Netherlands [1] | Yes                       | Yes                                  | Yes                           | NR                                  | No                                                   |                                                                          |
| Ly 2014, Australia [2]              | Yes                       | Yes                                  | NA                            |                                     | NA                                                   |                                                                          |
| Wan 2018, US [3]                    | Yes                       | Yes                                  | Yes                           | NR                                  | Yes                                                  | Training in CGM use for clinicians, daily hours devoted to diabetes care |
| Bilir 2018, Sweden [4]              | Yes                       | Yes                                  | NA                            |                                     | NA                                                   |                                                                          |
| Chaugule 2017, Canada [5]           | Yes                       | Yes                                  | NA                            |                                     | NA                                                   |                                                                          |
| Conget 2018, Spain [6]              | Yes                       | Yes                                  | Yes                           | NR                                  | No                                                   |                                                                          |
| Gomez 2016, Colombia [7]            | Yes                       | Yes                                  | NA                            |                                     | NA                                                   |                                                                          |
| Isitt 2022, Australia [8]           | Yes                       | Yes                                  | NA                            |                                     | NA                                                   |                                                                          |
| Jendle 2017, Sweden [9]             | Yes                       | Yes                                  | Yes                           | Human capital                       | No                                                   |                                                                          |
| Jendle 2019, Sweden [10]            | Yes                       | Yes                                  | Yes                           | Human capital                       | No                                                   |                                                                          |
| Jendle 2021, Sweden [11]            | Yes                       | Yes                                  | Yes                           | NR                                  | Yes                                                  | Training of staff                                                        |
| Kamble 2012, US [12]                | Yes                       | Yes                                  | NA                            |                                     | NA                                                   |                                                                          |
| Lambadiari 2022, Greece [13]        | Yes                       | Yes                                  | Yes                           | Human capital                       | No                                                   |                                                                          |
| Nicolucci 2018, Italy [14]          | Yes                       | Yes                                  | Yes                           | Human capital                       | No                                                   |                                                                          |
| Riemsma 2016, UK [15]               | Yes                       | Yes                                  | NA                            |                                     | NA                                                   |                                                                          |
| Roze 2015, Sweden [16]              | Yes                       | Yes                                  | Yes                           | Human capital                       | No                                                   |                                                                          |
| Roze 2016, France [17]              | Yes                       | Yes                                  | NA                            |                                     | NA                                                   |                                                                          |
| Roze 2016, UK [18]                  | Yes                       | Yes                                  | NA                            |                                     | NA                                                   |                                                                          |
| Roze 2017, Denmark [19]             | Yes                       | Yes                                  | Yes                           | Human capital                       | No                                                   |                                                                          |

|                                                 |     |     |     |               |     |                                                                                                                                                                                       |
|-------------------------------------------------|-----|-----|-----|---------------|-----|---------------------------------------------------------------------------------------------------------------------------------------------------------------------------------------|
| <b>Roze 2019, The Netherlands [20]</b>          | Yes | Yes | Yes | Human capital | No  |                                                                                                                                                                                       |
| <b>Roze 2019, Turkey [21]</b>                   | Yes | Yes | NA  |               | NA  |                                                                                                                                                                                       |
| <b>Roze 2020, UK [22]</b>                       | Yes | Yes | NA  |               | NA  |                                                                                                                                                                                       |
| <b>Roze 2021, Canada [23]</b>                   | Yes | Yes | NA  |               | NA  |                                                                                                                                                                                       |
| <b>Roze 2021, UK [24]</b>                       | Yes | Yes | NA  |               | NA  |                                                                                                                                                                                       |
| <b>Roze 2021, France [25]</b>                   | Yes | Yes | NA  |               | NA  |                                                                                                                                                                                       |
| <b>Serné 2022, The Netherlands [26]</b>         | Yes | Yes | Yes | Human capital | No  |                                                                                                                                                                                       |
| <b>Zhao 2021, China [27]</b>                    | Yes | Yes | Yes | NR            | No  |                                                                                                                                                                                       |
| <b>Garcia-Lorenzo 2018, Spain [28]</b>          | Yes | Yes | NA  |               | NA  |                                                                                                                                                                                       |
| <b>Health Quality Ontario 2018, Canada [29]</b> | Yes | Yes | NA  |               | NA  |                                                                                                                                                                                       |
| <b>Huang 2010, US [30]</b>                      | Yes | Yes | Yes | NR            | Yes | Training of staff, time of investigators/coordinators devoted to training/counseling patient, hours per day devoted to diabetes care by patient/primary caregiver/secondary caregiver |
| <b>McQueen 2011, US [31]</b>                    | Yes | Yes | Yes | NR            | No  |                                                                                                                                                                                       |
| <b>Pease 2020, Australia [32]</b>               | Yes | Yes | NA  |               | NA  |                                                                                                                                                                                       |
| <b>Pease 2022, Australia [33]</b>               | Yes | Yes | NA  |               | NA  |                                                                                                                                                                                       |
| <b>Rotondi 2022, Canada [34]</b>                | Yes | Yes | NA  |               | NA  |                                                                                                                                                                                       |

Abbreviations: NA, not applicable; NR not reported.

**Table 2. CGM- and insulin- related cost items included in the studies.**

| Publication (author year, country)         | Pump | Pump reservoir | Pump infusion set | Pump training | Pump replacement | Sensor | Sensor insertion | Batteries | Transmitter/charger | Glucose meter | Test strips | Lancets | Insulin costs | Outpatient visit |
|--------------------------------------------|------|----------------|-------------------|---------------|------------------|--------|------------------|-----------|---------------------|---------------|-------------|---------|---------------|------------------|
| <b>Emamipour 2022, The Netherlands [1]</b> | NA   | NA             | NA                | NA            | NA               | Yes    | No               | No        | Unclear*            | No            | No          | No      | No            | No               |
| <b>Ly 2014, Australia [2]</b>              | Yes  | Yes            | Yes               | No            | Unclear*         | Yes    | No               | Yes       | Yes                 | No            | Yes         | Yes     | Yes           | No               |

|                                         |     |     |     |     |           |     |           |           |           |           |           |           |     |     |
|-----------------------------------------|-----|-----|-----|-----|-----------|-----|-----------|-----------|-----------|-----------|-----------|-----------|-----|-----|
| <b>Wan 2018, US [3]</b>                 | NA  | NA  | NA  | NA  | NA        | Yes | No        | No        | Yes       | No        | Yes       | No        | No  | No  |
| <b>Bilir 2018, Sweden [4]</b>           | No  | No  | No  | No  | No        | Yes | No        | No        | Yes       | No        | Yes       | Yes       | Yes | Yes |
| <b>Chaugule 2017, Canada [5]</b>        | NA  | NA  | NA  | NA  | NA        | Yes | No        | No        | Yes       | No        | Yes       | No        | No  | No  |
| <b>Conget 2018, Spain [6]</b>           | Yes | No  | No  | No  | No        | Yes | Unclear * | Unclear * | Unclear * | No        | Unclear * | Unclear * | No  | No  |
| <b>Gomez 2016, Colombia [7]</b>         | No  | No  | No  | No  | No        | Yes | Yes       | Yes       | Yes       | No        | Yes       | Yes       | No  | No  |
| <b>Isitt 2022, Australia [8]</b>        | NA  | NA  | NA  | NA  | NA        | Yes | No        | No        | Yes       | No        | Yes       | No        | No  | No  |
| <b>Jendle 2017, Sweden [9]</b>          | No  | No  | No  | No  | No        | Yes | Yes       | Yes       | Yes       | No        | Yes       | Yes       | No  | No  |
| <b>Jendle 2019, Sweden [10]</b>         | Yes | Yes | Yes | No  | No        | Yes | Yes       | Yes       | Yes       | Yes       | Yes       | Yes       | No  | No  |
| <b>Jendle 2021, Sweden [11]</b>         | Yes | Yes | Yes | Yes | No        | Yes | Unclear * | Unclear * | Yes       | Unclear * | Yes       | Yes       | Yes | No  |
| <b>Kamble 2012, US [12]</b>             | Yes | Yes | Yes | No  | Yes       | Yes | Yes       | No        | Yes       | Yes       | Yes       | Yes       | Yes | Yes |
| <b>Lambadiari 2022, Greece [13]</b>     | Yes | No  | No  | No  | Unclear * | Yes | No        | No        | No        | No        | Yes       | Yes       | Yes | No  |
| <b>Nicolucci 2018, Italy [14]</b>       | No  | No  | No  | No  | No        | Yes | No        | No        | Unclear * | Unclear * | Yes       | Unclear * | No  | No  |
| <b>Riemsma 2016, UK [15]</b>            | Yes | Yes | Yes | Yes | Yes       | Yes | No        | Yes       | Yes       | No        | Yes       | Yes       | Yes | Yes |
| <b>Roze 2015, Sweden [16]</b>           | Yes | No  | No  | No  | No        | Yes | Yes       | Yes       | No        | No        | Yes       | Yes       | No  | No  |
| <b>Roze 2016, France [17]</b>           | No  | No  | No  | No  | No        | Yes | Yes       | Yes       | Yes       | No        | Yes       | Yes       | No  | No  |
| <b>Roze 2016, UK [18]</b>               | No  | No  | No  | No  | No        | Yes | No        | No        | Yes       | No        | Yes       | Yes       | No  | No  |
| <b>Roze 2017, Denmark [19]</b>          | No  | No  | No  | No  | No        | Yes | Yes       | Yes       | Yes       | No        | Yes       | Yes       | No  | No  |
| <b>Roze 2019, The Netherlands [20]</b>  | No  | No  | No  | No  | No        | Yes | Yes       | Yes       | Yes       | No        | Yes       | Yes       | No  | No  |
| <b>Roze 2019, Turkey [21]</b>           | No  | No  | No  | No  | No        | Yes | Yes       | Yes       | Yes       | No        | Yes       | Yes       | No  | No  |
| <b>Roze 2020, UK [22]</b>               | NA  | NA  | NA  | NA  | NA        | Yes | No        | No        | Yes       | Unclear * | Yes       | Yes       | No  | No  |
| <b>Roze 2021, Canada [23]</b>           | NA  | NA  | NA  | NA  | NA        | Yes | No        | No        | Yes       | Unclear * | Yes       | Yes       | No  | No  |
| <b>Roze 2021, UK [24]</b>               | Yes | Yes | Yes | Yes | No        | Yes | Yes       | Yes       | Yes       | Unclear * | Yes       | Yes       | Yes | Yes |
| <b>Roze 2021, France [25]</b>           | NA  | NA  | NA  | NA  | NA        | Yes | No        | No        | Yes       | Unclear * | Unclear * | Unclear * | No  | No  |
| <b>Serné 2022, The Netherlands [26]</b> | Yes | No  | No  | No  | Unclear * | Yes | Yes       | Yes       | Yes       | No        | Yes       | Yes       | Yes | No  |

|                                                 |     |           |           |     |           |     |    |     |           |           |     |           |     |    |
|-------------------------------------------------|-----|-----------|-----------|-----|-----------|-----|----|-----|-----------|-----------|-----|-----------|-----|----|
| <b>Zhao 2021, China [27]</b>                    | NA  | NA        | NA        | NA  | NA        | Yes | No | No  | Unclear * | Unclear * | Yes | Yes       | Yes | No |
| <b>Garcia-Lorenzo 2018, Spain [28]</b>          | No  | No        | No        | No  | No        | Yes | No | No  | Yes       | Yes       | Yes | No        | No  | No |
| <b>Health Quality Ontario 2018, Canada [29]</b> | Yes | Yes       | Yes       | No  | No        | Yes | No | Yes | Yes       | No        | Yes | No        | Yes | No |
| <b>Huang 2010, US [30]</b>                      | Yes | Unclear * | Unclear * | Yes | Unclear * | Yes | No | No  | Yes       | No        | Yes | Yes       | Yes | No |
| <b>McQueen 2011, US [31]</b>                    | NA  | NA        | NA        | NA  | NA        | Yes | No | Yes | Yes       | No        | No  | No        | No  | No |
| <b>Pease 2020, Australia [32]</b>               | Yes | Yes       | Yes       | No  | Unclear * | Yes | No | Yes | Yes       | Unclear * | Yes | Unclear * | No  | No |
| <b>Pease 2022, Australia [33]</b>               | No  | Yes       | Yes       | No  | Unclear * | Yes | No | Yes | Yes       | Unclear * | Yes | Unclear * | No  | No |
| <b>Rotondi 2022, Canada [34]</b>                | NA  | NA        | NA        | NA  | NA        | Yes | No | No  | No        | No        | Yes | No        | No  | No |

\* Reported as unclear if implied in text, but not clear from tables in the included study.

Abbreviations: NA, not applicable.

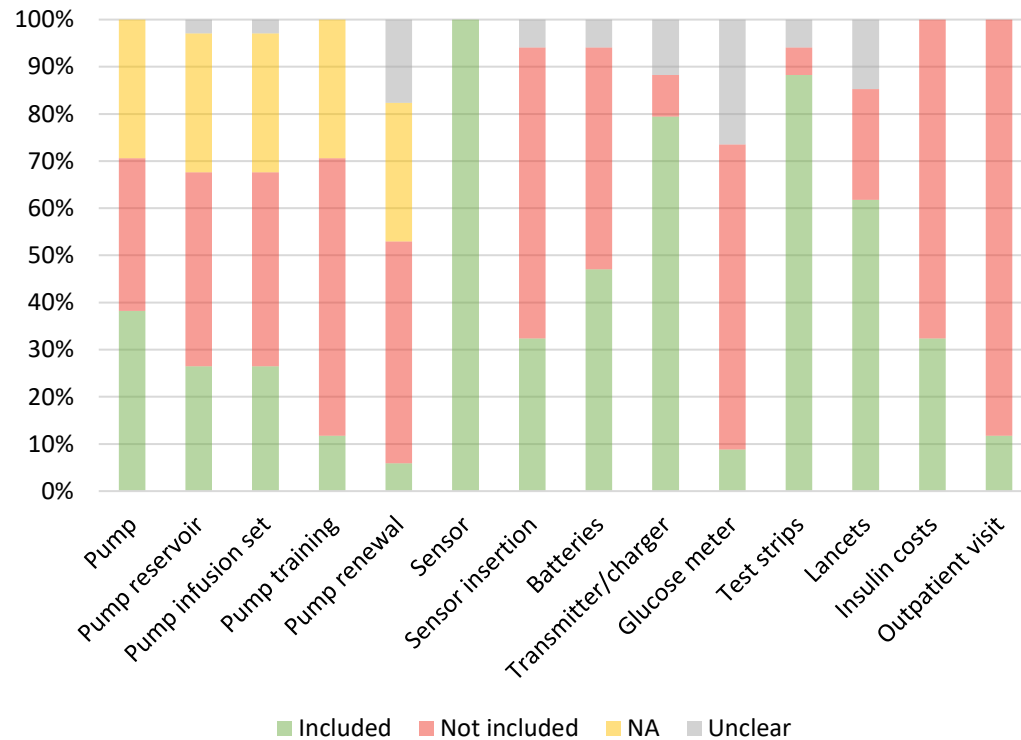

**Figure 1. Proportion of studies that included CGM- and insulin-related unit costs.**

## References

1. Emami-pour S, van Dijk PR, Bilo HJG, Edens MA, van der Galiën O, Postma MJ, et al. Personalizing the Use of a Intermittently Scanned Continuous Glucose Monitoring (isCGM) Device in Individuals With Type 1 Diabetes: A Cost-Effectiveness Perspective in the Netherlands (FLARE-NL 9). *J Diabetes Sci Technol*. 2022.
2. Ly TT, Brnabic AJM, Eggleston A, Kolivos A, McBride ME, Schrover R, et al. A cost-effectiveness analysis of sensor-augmented insulin pump therapy and automated insulin suspension versus standard pump therapy for hypoglycemic unaware patients with type 1 diabetes. *Value Health*. 2014;17:561–9.
3. Wan W, Skandari MR, Minc A, Nathan AG, Winn A, Zarei P, et al. Cost-effectiveness of Continuous Glucose Monitoring for Adults With Type 1 Diabetes Compared With Self-Monitoring of Blood Glucose: The DIAMOND Randomized Trial. *Diabetes Care*. 2018;41:1227–34.

4. Bilir SP, Hellmund R, Wehler B, Li H, Munakata J, Lamotte M. Cost-effectiveness Analysis of a Flash Glucose Monitoring System for Patients with Type 1 Diabetes Receiving Intensive Insulin Treatment in Sweden. *Eur Endocrinol.* 2018;14:73–9.
5. Chaugule S, Graham C. Cost-effectiveness of G5 Mobile continuous glucose monitoring device compared to self-monitoring of blood glucose alone for people with type 1 diabetes from the Canadian societal perspective. *J Med Econ.* 2017;20:1128–35.
6. Conget I, Martín-Vaquero P, Roze S, Elías I, Pineda C, Álvarez M, et al. Cost-effectiveness analysis of sensor-augmented pump therapy with low glucose-suspend in patients with type 1 diabetes mellitus and high risk of hypoglycemia in Spain. *Endocrinol Diabetes Nutr.* 2018;65:380–6.
7. Gomez AM, Alfonso-Cristancho R, Orozco JJ, Lynch PM, Prieto D, Saunders R, et al. Clinical and economic benefits of integrated pump/CGM technology therapy in patients with type 1 diabetes in Colombia. *Endocrinol Nutr.* 2016;63:466–74.
8. Isitt JJ, Roze S. Long-term cost-effectiveness of Dexcom G6 real-time continuous glucose monitoring system in people with type 1 diabetes in Australia: Response to letter from Hellmund, Richard and Welsh, Zoe. *Diabet Med.* 2023;40.
9. Jendle J, Smith-Palmer J, Delbaere A, de Portu S, Papo N, Valentine W, et al. Cost-Effectiveness Analysis of Sensor-Augmented Insulin Pump Therapy with Automated Insulin Suspension Versus Standard Insulin Pump Therapy in Patients with Type 1 Diabetes in Sweden. *Diabetes Ther.* 2017;8:1015–30.
10. Jendle J, Pöhlmann J, De Portu S, Smith-Palmer J, Roze S. Cost-Effectiveness Analysis of the MiniMed 670G Hybrid Closed-Loop System Versus Continuous Subcutaneous Insulin Infusion for Treatment of Type 1 Diabetes. *Diabetes Technol Ther.* 2019;21:110–8.
11. Jendle J, Buompiensiere MI, Holm AL, de Portu S, Malkin SJP, Cohen O. The Cost-Effectiveness of an Advanced Hybrid Closed-Loop System in People with Type 1 Diabetes: a Health Economic Analysis in Sweden. *Diabetes Ther.* 2021;12:2977–91.
12. Kamble S, Schulman KA, Reed SD. Cost-effectiveness of sensor-augmented pump therapy in adults with type 1 diabetes in the United States. *Value Health.* 2012;15:632–8.
13. Lambadiari V, Ozdemir Saltik AZ, De Portu S, Buompiensiere MI, Kountouri A, Korakas E, et al. Cost-Effectiveness Analysis of an Advanced Hybrid Closed-Loop Insulin Delivery System in People with Type 1 Diabetes in Greece. *Diabetes Technol Ther.* 2022;24:316–23.
14. Nicolucci A, Rossi MC, D'Ostilio D, Delbaere A, de Portu S, Roze S. Cost-effectiveness of sensor-augmented pump therapy in two different patient populations with type 1 diabetes in Italy. *Nutr Metab Cardiovasc Dis.* 2018;28:707–15.
15. Riemsma R, Ramos IC, Birnie R, Büyükkaramikli N, Armstrong N, Ryder S, et al. Integrated sensor-augmented pump therapy systems [the MiniMed® Paradigm™ Veo system and the Vibe™ and G4® PLATINUM CGM (continuous glucose monitoring) system] for managing blood glucose levels in type 1 diabetes: a systematic review and economic evaluation. *Health Technol Assess.* 2016;20:1–252.
16. Roze S, Saunders R, Brandt AS, de Portu S, Papo NL, Jendle J. Health-economic analysis of real-time continuous glucose monitoring in people with Type 1 diabetes. *Diabet Med.* 2015;32:618–26.
17. Roze S, Smith-Palmer J, Valentine W, Payet V, De Portu S, Papo N, et al. Cost-Effectiveness of Sensor-Augmented Pump Therapy with Low Glucose Suspend Versus Standard Insulin Pump Therapy in Two Different Patient Populations with Type 1 Diabetes in France. *Diabetes Technol Ther.* 2016;18:75–84.
18. Roze S, Smith-Palmer J, Valentine WJ, Cook M, Jethwa M, De Portu S, et al. Long-term health economic benefits of sensor-augmented pump therapy vs continuous subcutaneous insulin infusion alone in type 1 diabetes: a U.K. perspective. *J Med Econ.* 2016;19:236–42.
19. Roze S, de Portu S, Smith-Palmer J, Delbaere A, Valentine W, Ridderstråle M. Cost-effectiveness of sensor-augmented pump therapy versus standard insulin pump therapy in patients with type 1 diabetes in Denmark. *Diabetes Res Clin Pract.* 2017;128:6–14.

20. Roze S, Smith-Palmer J, De Portu S, Delbaere A, De Brouwer B, De Valk HW. Cost-effectiveness of sensor-augmented insulin pump therapy vs continuous subcutaneous insulin infusion in patients with type 1 diabetes in the Netherlands. *Clinicoecon Outcomes Res.* 2019;11:73–82.
21. Roze S, Smith-Palmer J, De Portu S, Özdemir Saltik AZ, Akgül T, Deyneli O. Cost-Effectiveness of Sensor-Augmented Insulin Pump Therapy Versus Continuous Insulin Infusion in Patients with Type 1 Diabetes in Turkey. *Diabetes Technol Ther.* 2019;21:727–35.
22. Roze S, Isitt J, Smith-Palmer J, Javanbakht M, Lynch P. Long-term Cost-Effectiveness of Dexcom G6 Real-time Continuous Glucose Monitoring Versus Self-Monitoring of Blood Glucose in Patients With Type 1 Diabetes in the U.K. *Diabetes Care.* 2020;43:2411–7.
23. Roze S, Isitt JJ, Smith-Palmer J, Lynch P. Evaluation of the Long-Term Cost-Effectiveness of the Dexcom G6 Continuous Glucose Monitor versus Self-Monitoring of Blood Glucose in People with Type 1 Diabetes in Canada. *Clinicoecon Outcomes Res.* 2021;13:717–25.
24. Roze S, Buompensiere MI, Ozdemir Z, de Portu S, Cohen O. Cost-effectiveness of a novel hybrid closed-loop system compared with continuous subcutaneous insulin infusion in people with type 1 diabetes in the UK. *J Med Econ.* 2021;24:883–90.
25. Roze S, Isitt JJ, Smith-Palmer J, Lynch P, Klinkenbijn B, Zammit G, et al. Long-Term Cost-Effectiveness the Dexcom G6 Real-Time Continuous Glucose Monitoring System Compared with Self-Monitoring of Blood Glucose in People with Type 1 Diabetes in France. *Diabetes Ther.* 2021;12:235–46.
26. Serné EH, Roze S, Buompensiere MI, Valentine WJ, De Portu S, de Valk HW. Cost-Effectiveness of Hybrid Closed Loop Insulin Pumps Versus Multiple Daily Injections Plus Intermittently Scanned Glucose Monitoring in People With Type 1 Diabetes in The Netherlands. *Adv Ther.* 2022;39:1844–56.
27. Zhao X, Ming J, Qu S, Li HJ, Wu J, Ji L, et al. Cost-Effectiveness of Flash Glucose Monitoring for the Management of Patients with Type 1 and Patients with Type 2 Diabetes in China. *Diabetes Ther.* 2021;12:3079–92.
28. García-Lorenzo B, Rivero-Santana A, Vallejo-Torres L, Castilla-Rodríguez I, García-Pérez S, García-Pérez L, et al. Cost-effectiveness analysis of real-time continuous monitoring glucose compared to self-monitoring of blood glucose for diabetes mellitus in Spain. *J Eval Clin Pract.* 2018;24:772–81.
29. Continuous Monitoring of Glucose for Type 1 Diabetes: A Health Technology Assessment. Ontario; 2018 Feb.
30. Huang ES, O’Grady M, Basu A, Winn A, John P, Lee J, et al. The cost-effectiveness of continuous glucose monitoring in type 1 diabetes. *Diabetes Care.* 2010;33:1269–74.
31. McQueen RB, Ellis SL, Campbell JD, Nair K V., Sullivan PW. Cost-effectiveness of continuous glucose monitoring and intensive insulin therapy for type 1 diabetes. *Cost Eff Resour Alloc.* 2011;9.
32. Pease A, Zomer E, Liew D, Earnest A, Soldatos G, Ademi Z, et al. Cost-Effectiveness Analysis of a Hybrid Closed-Loop System Versus Multiple Daily Injections and Capillary Glucose Testing for Adults with Type 1 Diabetes. *Diabetes Technol Ther.* 2020;22:812–21.
33. Pease A, Callander E, Zomer E, Abraham MB, Davis EA, Jones TW, et al. The Cost of Control: Cost-effectiveness Analysis of Hybrid Closed-Loop Therapy in Youth. *Diabetes Care.* 2022;45:1971–80.
34. Rotondi MA, Wong O, Riddell M, Perkins B. Population-Level Impact and Cost-effectiveness of Continuous Glucose Monitoring and Intermittently Scanned Continuous Glucose Monitoring Technologies for Adults With Type 1 Diabetes in Canada: A Modeling Study. *Diabetes Care.* 2022;45:2012–9.
