# Supplementary material for: Evaluating the Cost-Utility of Continuous Glucose Monitoring in Individuals with Type 1 Diabetes: A Systematic Review of the Methods and Quality of Studies Using Decision Models or Empirical Data
Source: PubMed Central journal article supplement — Pharmacoeconomics. 2024 Jun 21;42(9):929–53. doi: 10.1007/s40273-024-01388-6 (PMC11343921; doi:10.1007/s40273-024-01388-6), 2024-06-21
Supplement: 40273_2024_1388_MOESM12_ESM.pdf [file 40273_2024_1388_MOESM12_ESM.pdf]

## Supplementary Information – Online Resource 12

Evaluating cost-utility of continuous glucose monitoring in individuals with type 1 diabetes: a systematic review of methods and quality of studies using decision models and/or empirical data.

de Jong LA<sup>1\*</sup> (ORCID ID: 0000-0001-8814-0670), Li X<sup>2</sup> (ORCID ID: 0000-0002-0225-6937), Emamipour S<sup>3</sup>, van der Werf S<sup>4</sup> (ORCID ID: 0000-0001-5856-7657), Postma MJ<sup>1,5</sup>, van Dijk PR<sup>6</sup> (ORCID ID: 0000-0002-9702-6551), Feenstra TL<sup>2</sup> (ORCID ID: 0000-0002-5788-0454)

<sup>1</sup> Department of Health Sciences, University Medical Center Groningen, University of Groningen, Groningen, the Netherlands

<sup>2</sup> Unit of Pharmacotherapy, -Epidemiology & -Economics, University of Groningen, Groningen Research Institute of Pharmacy (GRIP), Groningen, the Netherlands

<sup>3</sup> Department of Clinical Pharmacy and Pharmacology, University Medical Center Groningen, University of Groningen, Groningen, the Netherlands

<sup>4</sup> Central Medical Library, University Medical Center Groningen, University of Groningen, Groningen, the Netherlands

<sup>5</sup> Department of Economics, Econometrics and Finance, Faculty of Economics & Business, University of Groningen, Groningen, the Netherlands

<sup>6</sup> Department of Endocrinology. University Medical Center Groningen, University of Groningen, Groningen, The Netherlands

\*Corresponding author: [t.l.feenstra@rug.nl](mailto:t.l.feenstra@rug.nl)

**Table 1. Sources for (dis)utilities used in the included studies.**

| Publication (author year, country)         | Baseline utility                                   | Macro- and microvascular complications <sup>a</sup>                                       | Hypoglycemic events <sup>b</sup> | Reduction in Fear of hypoglycemia benefit <sup>c</sup> | Ketoacidosis | Utility gain for reduction of finger pricks <sup>d</sup> | CGM-related benefit                                |
|--------------------------------------------|----------------------------------------------------|-------------------------------------------------------------------------------------------|----------------------------------|--------------------------------------------------------|--------------|----------------------------------------------------------|----------------------------------------------------|
| <b>Emamipour 2022, The Netherlands [1]</b> | Measured in the trial itself: EQ-5D-3L             | -                                                                                         | -                                | -                                                      | -            | -                                                        | Measured in the trial itself: EQ-5D-3L             |
| <b>Huang 2010, US [2]</b>                  | Measured in the trial itself: TTO in T1D           | Measured in the trial itself: TTO in T1D                                                  | -                                | -                                                      | -            | -                                                        | Measured in the trial itself: TTO in T1D           |
| <b>Ly 2014, Australia [3]</b>              | Measured in the trial itself: EQ-5D-3L and EQ-5D-Y | -                                                                                         | -                                | -                                                      | -            | -                                                        | Measured in the trial itself: EQ-5D-3L and EQ-5D-Y |
| <b>Wan 2018, US [4]</b>                    | Measured in the trial itself: EQ-5D-5L             | From 3 different studies: mainly EQ-5D and TTO from different countries for T1D and T2D   | Harris et al. [5]                | -                                                      | -            | -                                                        | Measured in the trial itself: EQ-5D-5L             |
| <b>Bilir 2018, Sweden [6]</b>              | -                                                  | -                                                                                         | -                                | Currie et al. [7]<br>Lauridsen et al. [8]              | -            | Matza et al. [9]                                         | -                                                  |
| <b>Chaugule 2017, Canada [10]</b>          | -                                                  | From 7 different studies: mainly EQ-5D, some TTO from different countries for T1D and T2D | -                                | -                                                      | -            | -                                                        | -                                                  |
| <b>Conget 2018, Spain [11]</b>             | -                                                  | Beaudet et al. [12]                                                                       | -                                | Currie et al. [7]                                      | -            | -                                                        | -                                                  |
| <b>Gomez 2016, Colombia [13]</b>           | -                                                  | Clark et al. [14]<br>Tengs et al. [15]                                                    | -                                | Currie et al. [7]                                      | -            | -                                                        | -                                                  |
| <b>Isitt 2022, Australia [16]</b>          | DIAMOND trial (Polonsky et al. [17])               | Beaudet et al. [12]<br>Solli et al. [18]                                                  | Evans et al. [19]                | Currie et al. [7]                                      | -            | Matza et al. [9]                                         | Pease et al. [20]                                  |

|                                     |   |                                                                                          |                                                                                                                                                                                         |                                          |   |   |   |
|-------------------------------------|---|------------------------------------------------------------------------------------------|-----------------------------------------------------------------------------------------------------------------------------------------------------------------------------------------|------------------------------------------|---|---|---|
| <b>Jendle 2017, Sweden [21]</b>     | - | Beaudet et al. [12]                                                                      | -                                                                                                                                                                                       | Currie et al. [7]<br>McBride et al. [22] | - | - | - |
| <b>Jendle 2019, Sweden [23]</b>     | - | Beaudet et al. [12]                                                                      | Evans et al. [19]                                                                                                                                                                       | Currie et al. [7]                        | - | - | - |
| <b>Jendle 2021, Sweden [24]</b>     | - | From 6 different studies: a mix of EQ-5D and TTO from various countries for T1D and T2D. | Evans et al. [19]<br>Marrett et al. [25]<br>Lauridsen et al. [8]                                                                                                                        | Currie et al. [7]                        | - | - | - |
| <b>Kamble 2012, US [26]</b>         | - | Clark et al. [14]<br>Tengs et al. [15]                                                   | Evans et al. [19]                                                                                                                                                                       | Currie et al. [7]                        | - | - | - |
| <b>Lambadiari 2022, Greece [27]</b> | - | Beaudet et al. [12]                                                                      | Evans et al. [19]<br>Marrett et al. [25]<br>Lauridsen et al. [8]                                                                                                                        | Currie et al. [7]                        | - | - | - |
| <b>Nicolucci 2018, Italy [28]</b>   | - | Beaudet et al. [12]                                                                      | -                                                                                                                                                                                       | Currie et al. [7]                        | - | - | - |
| <b>Riemsma 2016, UK [29]</b>        | - | Beaudet et al. [12]<br>Clark et al. [14]                                                 | Currie et al. [7]                                                                                                                                                                       | Currie et al. [7]                        | - | - | - |
| <b>Roze 2015, Sweden [30]</b>       | - | Unclear, not referenced                                                                  | -                                                                                                                                                                                       | Currie et al. [7]                        | - | - | - |
| <b>Roze 2016, France [31]</b>       | - | Beaudet et al. [12]                                                                      | TTO was used for direct elicitation, but unclear how because the authors also state: "Conservatively, no specific disutility for severe hypoglycemic events was applied in either arm." | Currie et al. [7]                        | - | - | - |
| <b>Roze 2016, UK [32]</b>           | - | Beaudet et al. [12]                                                                      | -                                                                                                                                                                                       | Currie et al. [7]                        | - | - | - |

|                                                 |                                  |                                                                                                |                                          |                                          |                        |                  |   |
|-------------------------------------------------|----------------------------------|------------------------------------------------------------------------------------------------|------------------------------------------|------------------------------------------|------------------------|------------------|---|
| <b>Roze 2017, Denmark [33]</b>                  | -                                | Beaudet et al. [12]                                                                            | -                                        | Currie et al. [7]                        | -                      | -                | - |
| <b>Roze 2019, The Netherlands [34]</b>          | -                                | -                                                                                              | -                                        | Currie et al. [7]<br>McBride et al. [22] | -                      | -                | - |
| <b>Roze 2019, Turkey [35]</b>                   | -                                | Beaudet et al. [12]                                                                            | -                                        | Currie et al. [7]<br>McBride et al. [22] | -                      | -                | - |
| <b>Roze 2020, UK [36]</b>                       | DIAMOND trial (Beck et al. [37]) | Beaudet et al. [12]                                                                            | Evans et al. [19]                        | Currie et al. [7]                        | -                      | Matza et al. [9] | - |
| <b>Roze 2021, Canada [38]</b>                   | DIAMOND trial (Beck et al. [37]) | Beaudet et al. [12]                                                                            | Evans et al. [19]                        | Currie et al. [7]                        | -                      | Matza et al. [9] | - |
| <b>Roze 2021, UK [39]</b>                       | -                                | Beaudet et al. [12]                                                                            | Evans et al. [19]<br>Marrett et al. [25] | Currie et al. [7]                        | -                      | -                | - |
| <b>Roze 2021, France [40]</b>                   | DIAMOND trial (Beck et al. [37]) | Beaudet et al. [12]                                                                            | Evans et al. [19]                        | Currie et al. [7]                        | -                      | Matza et al. [9] | - |
| <b>Serné 2022, The Netherlands [41]</b>         | -                                | Beaudet et al. [12]                                                                            | -                                        | Currie et al. [7]                        | -                      | -                | - |
| <b>Zhao 2021, China [42]</b>                    | Incorrectly referenced           | Incorrectly referenced                                                                         | -                                        | Charleer et al. [43]                     | Incorrectly referenced | -                | - |
| <b>Garcia-Lorenzo 2018, Spain [44]</b>          | -                                | Sullivan et al. [45]<br>+ own estimation                                                       | -                                        | -                                        | -                      | -                | - |
| <b>Health Quality Ontario 2018, Canada [46]</b> | Clark et al. [14]                | McQueen et al. [47]<br>Palmer et al. 2004 [48].<br>Tengs et al. [15]                           | Currie et al. [7]                        | -                                        | -                      | -                | - |
| <b>McQueen 2011, US [47]</b>                    | -                                | Sullivan et al. [45]<br>+ own estimation                                                       | -                                        | -                                        | -                      | -                | - |
| <b>Pease 2020, Australia [49]</b>               | -                                | Colagiuri et al. [50]                                                                          | Harris et al. [5]                        | -                                        | -                      | -                | - |
| <b>Pease 2022, Australia [51]</b>               | Colagiuri et al. [50]            | From 10 different studies studies: mainly EQ-5D and TTO from various countries for T1D and T2D | Harris et al. [5]                        | -                                        | -                      | -                | - |

|                                  |                                      |                                          |                                                                           |   |                                                                           |   |   |
|----------------------------------|--------------------------------------|------------------------------------------|---------------------------------------------------------------------------|---|---------------------------------------------------------------------------|---|---|
| <b>Rotondi 2022, Canada [52]</b> | DIAMOND trial (Polonsky et al. [17]) | Beaudet et al. [12]<br>Solli et al. [18] | Pettus et al. [53]<br>Unclear how this study was used to obtain utilities | - | Pettus et al. [53]<br>Unclear how this study was used to obtain utilities | - | - |
|----------------------------------|--------------------------------------|------------------------------------------|---------------------------------------------------------------------------|---|---------------------------------------------------------------------------|---|---|

Abbreviations: CGM, continuous glucose monitoring; EQ-5D, EuroQoL 5 dimension; NR, not reported; TTO, time trade-off; T1D, type 1 diabetes; T2D, type 2 diabetes; UK, United Kingdom; US, United States.

<sup>a</sup> Beaudet et al. [12] is a review of UK NICE reference cases and has 13 studies included covering utilities for uncomplicated diabetes and 21 complications. 1 study was TTO, the others EQ-5D-3L, from various countries for T2D; Clark et al. [14] the EQ-5D-3L instrument was used to elucidate utilities for T2D patients from UKPDS database (UK); Solli et al. [18] the EQ-5D-3L instrument was used to elucidate utility values in T1D and T2D in Norway; Sullivan et al. [45] used the EQ-5D-3L instrument to elucidate utility values from general population in the US, covering 693 chronic conditions. Palmer et al. [47] refers to the original paper of the CORE model, which in turn sources utility weights from five different sources among which Clarck et al. and Tengs et al.; Tengs et al. [14] is a review of utility weights for a long list of diagnoses including studies using various methods, of which 51% used direct elicitation (standard gamble, TTO, or rating scale), 32% estimated QOL based on their own expertise or that of others, and 17% used health status instruments; DIAMOND trial (Polonsky/Beck [17,37]): EQ-5D-5L in T1D from the US.

<sup>b</sup> Harris et al. [5] is a Canadian survey that used TTO to elucidate utility values for hypoglycemic events in T1D; Evans et al. [19] TTO was used to elucidate utility values for daytime and nocturnal hypoglycemic events in a mixed population of general population and T1D and T2D from Canada, Germany, Sweden, the United States and the United Kingdom, Currie et al. [7] used the Hypoglycemia Fear Survey and EQ-5D-3L instruments to elucidate utility values for fear of hypoglycemia in diabetes patients in Cardiff, UK; Marrett et al. [25] used the Hypoglycemia Fear Survey and EQ-5D-3L instruments to elucidate utility values for fear of hypoglycemia in self-reported T2D in the US; Lauridsen et al. [8] conducted a regression analysis on TTO disutility values from 5 countries to estimate the effect of the frequency of daytime and nocturnal hypoglycemic events on the disutilities.

<sup>c</sup> Currie et al. [7] used the Hypoglycemia Fear Survey and EQ-5D-3L instruments to elucidate utility values for fear of hypoglycemia in diabetes patients in Cardiff, UK; McBride et al. [22] used the Hypoglycemia Fear Survey and EQ-5D-3L instruments to estimate utility values in individuals with T1D with impaired hypoglycemia awareness treated with CSII alone or CSII with CGM with low-glucose suspend, country unclear; Charleer et al. [43] is a 12-month prospective observational multicenter real-world study that estimated the quality of life in Belgian individuals with T1D using SF-36, PAID-SF, and HFS-Worry instruments.

<sup>d</sup> Matza et al. [9] used TTO interviews to estimate the utility difference between picking the finger and flash glucose monitoring in general population in UK.

## References

1. Emamipour S, van Dijk PR, Bilo HJG, Edens MA, van der Galiën O, Postma MJ, et al. Personalizing the Use of a Intermittently Scanned Continuous Glucose Monitoring (isCGM) Device in Individuals With Type 1 Diabetes: A Cost-Effectiveness Perspective in the Netherlands (FLARE-NL 9). *J Diabetes Sci Technol*. 2022.
2. Huang ES, O'Grady M, Basu A, Winn A, John P, Lee J, et al. The cost-effectiveness of continuous glucose monitoring in type 1 diabetes. *Diabetes Care*. 2010 Jun;33(6):1269–74.

3. Ly TT, Brnabic AJM, Eggleston A, Kolivos A, McBride ME, Schrover R, et al. A cost-effectiveness analysis of sensor-augmented insulin pump therapy and automated insulin suspension versus standard pump therapy for hypoglycemic unaware patients with type 1 diabetes. *Value Health*. 2014;17(5):561–9.
4. Wan W, Skandari MR, Minc A, Nathan AG, Winn A, Zarei P, et al. Cost-effectiveness of Continuous Glucose Monitoring for Adults With Type 1 Diabetes Compared With Self-Monitoring of Blood Glucose: The DIAMOND Randomized Trial. *Diabetes Care*. 2018 Jun 1;41(6):1227–34.
5. Harris S, Mamdani M, Galbo-Jørgensen CB, Bøgelund M, Gundgaard J, Groleau D. The effect of hypoglycemia on health-related quality of life: Canadian results from a multinational time trade-off survey. *Can J Diabetes*. 2014;38(1):45–52.
6. Bilir SP, Hellmund R, Wehler B, Li H, Munakata J, Lamotte M. Cost-effectiveness Analysis of a Flash Glucose Monitoring System for Patients with Type 1 Diabetes Receiving Intensive Insulin Treatment in Sweden. *Eur Endocrinol*. 2018 Sep 1;14(2):73–9.
7. Currie CJ, Morgan CL, Poole CD, Sharplin P, Lammert M, McEwan P. Multivariate models of health-related utility and the fear of hypoglycaemia in people with diabetes. *Curr Med Res Opin*. 2006 Aug;22(8):1523–34.
8. Lauridsen JT, Lønborg J, Gundgaard J, Jensen HH. Diminishing marginal disutility of hypoglycaemic events: results from a time trade-off survey in five countries. *Qual Life Res*. 2014 Oct 7;23(9):2645–50.
9. Matza LS, Stewart KD, Davies EW, Hellmund R, Polonsky WH, Kerr D. Health State Utilities Associated with Glucose Monitoring Devices. *Value Health*. 2017 Mar 1;20(3):507–11.
10. Chaugule S, Graham C. Cost-effectiveness of G5 Mobile continuous glucose monitoring device compared to self-monitoring of blood glucose alone for people with type 1 diabetes from the Canadian societal perspective. *J Med Econ*. 2017 Nov 2;20(11):1128–35.
11. Conget I, Martín-Vaquero P, Roze S, Elías I, Pineda C, Álvarez M, et al. Cost-effectiveness analysis of sensor-augmented pump therapy with low glucose-suspend in patients with type 1 diabetes mellitus and high risk of hypoglycemia in Spain. *Endocrinol Diabetes Nutr*. 2018 Aug 1;65(7):380–6.
12. Beaudet A, Clegg J, Thuresson PO, Lloyd A, McEwan P. Review of utility values for economic modeling in type 2 diabetes. *Value Health*. 2014;17(4):462–70.
13. Gomez AM, Alfonso-Cristancho R, Orozco JJ, Lynch PM, Prieto D, Saunders R, et al. Clinical and economic benefits of integrated pump/CGM technology therapy in patients with type 1 diabetes in Colombia. *Endocrinol Nutr*. 2016 Nov 1;63(9):466–74.
14. Clarke P, Gray A, Holman R. Estimating utility values for health states of type 2 diabetic patients using the EQ-5D (UKPDS 62). *Med Decis Making*. 2002 Aug 1;22(4):340–9.
15. Tengs TO, Wallace A. One thousand health-related quality-of-life estimates. *Med Care*. 2000;38(6):583–637.
16. Isitt JJ, Roze S. Long-term cost-effectiveness of Dexcom G6 real-time continuous glucose monitoring system in people with type 1 diabetes in Australia: Response to letter from Hellmund, Richard and Welsh, Zoe. *Diabet Med*. 2023 Feb 1;40(2).
17. Polonsky WH, Hessler D, Ruedy KJ, Beck RW. The Impact of Continuous Glucose Monitoring on Markers of Quality of Life in Adults With Type 1 Diabetes: Further Findings From the DIAMOND Randomized Clinical Trial. *Diabetes Care*. 2017 Jun 1;40(6):736–41.
18. Solli O, Stavem K, Kristiansen IS. Health-related quality of life in diabetes: The associations of complications with EQ-5D scores. *Health Qual Life Outcomes*. 2010 Feb 4;8.
19. Evans M, Khunti K, Mamdani M, Galbo-Jørgensen CB, Gundgaard J, Bøgelund M, et al. Health-related quality of life associated with daytime and nocturnal hypoglycaemic events: a time trade-off survey in five countries. *Health Qual Life Outcomes*. 2013 Jun 3;11(1).
20. Pease A, Lo C, Earnest A, Kiriakova V, Liew D, Zoungas S. The Efficacy of Technology in Type 1 Diabetes: A Systematic Review, Network Meta-analysis, and Narrative Synthesis. *Diabetes Technol Ther*. 2020 May 1;22(5):411–21.

21. Jendle J, Smith-Palmer J, Delbaere A, de Portu S, Papo N, Valentine W, et al. Cost-Effectiveness Analysis of Sensor-Augmented Insulin Pump Therapy with Automated Insulin Suspension Versus Standard Insulin Pump Therapy in Patients with Type 1 Diabetes in Sweden. *Diabetes Ther*. 2017 Oct 1;8(5):1015–30.
22. McBride M, Eggleston AS, Jones T, Ly T. Health-Related Quality of Life in Patients with Type 1 Diabetes and Impaired Hypoglycaemia Awareness: The Role of Sensor-Augmented Insulin Pump Therapy with Automated Insulin Suspension. *Value in Health*. 2013 Nov 1;16(7):A448.
23. Jendle J, Pöhlmann J, De Portu S, Smith-Palmer J, Roze S. Cost-Effectiveness Analysis of the MiniMed 670G Hybrid Closed-Loop System Versus Continuous Subcutaneous Insulin Infusion for Treatment of Type 1 Diabetes. *Diabetes Technol Ther*. 2019 Mar 1;21(3):110–8.
24. Jendle J, Buompiersiere MI, Holm AL, de Portu S, Malkin SJP, Cohen O. The Cost-Effectiveness of an Advanced Hybrid Closed-Loop System in People with Type 1 Diabetes: a Health Economic Analysis in Sweden. *Diabetes Ther*. 2021 Nov 1;12(11):2977–91.
25. Marrett E, Radican L, Davies MJ, Zhang Q. Assessment of severity and frequency of self-reported hypoglycemia on quality of life in patients with type 2 diabetes treated with oral antihyperglycemic agents: A survey study. *BMC Res Notes*. 2011;4.
26. Kamble S, Schulman KA, Reed SD. Cost-effectiveness of sensor-augmented pump therapy in adults with type 1 diabetes in the United States. *Value Health*. 2012 Jul;15(5):632–8.
27. Lambadiari V, Ozdemir Saltik AZ, De Portu S, Buompiersiere MI, Kountouri A, Korakas E, et al. Cost-Effectiveness Analysis of an Advanced Hybrid Closed-Loop Insulin Delivery System in People with Type 1 Diabetes in Greece. *Diabetes Technol Ther*. 2022 May 1;24(5):316–23.
28. Nicolucci A, Rossi MC, D’Ostilio D, Delbaere A, de Portu S, Roze S. Cost-effectiveness of sensor-augmented pump therapy in two different patient populations with type 1 diabetes in Italy. *Nutr Metab Cardiovasc Dis*. 2018 Jul 1;28(7):707–15.
29. Riemsma R, Ramos IC, Birnie R, Büyükkaramikli N, Armstrong N, Ryder S, et al. Integrated sensor-augmented pump therapy systems [the MiniMed® Paradigm™ Veo system and the Vibe™ and G4® PLATINUM CGM (continuous glucose monitoring) system] for managing blood glucose levels in type 1 diabetes: a systematic review and economic evaluation. *Health Technol Assess*. 2016 Feb 1;20(17):1–252.
30. Roze S, Saunders R, Brandt AS, de Portu S, Papo NL, Jendle J. Health-economic analysis of real-time continuous glucose monitoring in people with Type 1 diabetes. *Diabet Med*. 2015 May 1;32(5):618–26.
31. Roze S, Smith-Palmer J, Valentine W, Payet V, De Portu S, Papo N, et al. Cost-Effectiveness of Sensor-Augmented Pump Therapy with Low Glucose Suspend Versus Standard Insulin Pump Therapy in Two Different Patient Populations with Type 1 Diabetes in France. *Diabetes Technol Ther*. 2016 Feb 1;18(2):75–84.
32. Roze S, Smith-Palmer J, Valentine WJ, Cook M, Jethwa M, De Portu S, et al. Long-term health economic benefits of sensor-augmented pump therapy vs continuous subcutaneous insulin infusion alone in type 1 diabetes: a U.K. perspective. *J Med Econ*. 2016 Mar 3;19(3):236–42.
33. Roze S, de Portu S, Smith-Palmer J, Delbaere A, Valentine W, Ridderstråle M. Cost-effectiveness of sensor-augmented pump therapy versus standard insulin pump therapy in patients with type 1 diabetes in Denmark. *Diabetes Res Clin Pract*. 2017 Jun 1;128:6–14.
34. Roze S, Smith-Palmer J, De Portu S, Delbaere A, De Brouwer B, De Valk HW. Cost-effectiveness of sensor-augmented insulin pump therapy vs continuous subcutaneous insulin infusion in patients with type 1 diabetes in the Netherlands. *Clinicoecon Outcomes Res*. 2019;11:73–82.
35. Roze S, Smith-Palmer J, De Portu S, Özdemir Saltik AZ, Akgül T, Deyneli O. Cost-Effectiveness of Sensor-Augmented Insulin Pump Therapy Versus Continuous Insulin Infusion in Patients with Type 1 Diabetes in Turkey. *Diabetes Technol Ther*. 2019 Dec 1;21(12):727–35.
36. Roze S, Isitt J, Smith-Palmer J, Javanbakht M, Lynch P. Long-term Cost-Effectiveness of Dexcom G6 Real-time Continuous Glucose Monitoring Versus Self-Monitoring of Blood Glucose in Patients With Type 1 Diabetes in the U.K. *Diabetes Care*. 2020 Oct 1;43(10):2411–7.

37. Beck RW, Riddlesworth T, Ruedy K, Ahmann A, Bergenstal R, Haller S, et al. Effect of Continuous Glucose Monitoring on Glycemic Control in Adults With Type 1 Diabetes Using Insulin Injections: The DIAMOND Randomized Clinical Trial. *JAMA*. 2017 Jan 24;317(4):371–8.
38. Roze S, Isitt JJ, Smith-Palmer J, Lynch P. Evaluation of the Long-Term Cost-Effectiveness of the Dexcom G6 Continuous Glucose Monitor versus Self-Monitoring of Blood Glucose in People with Type 1 Diabetes in Canada. *Clinicoecon Outcomes Res*. 2021;13:717–25.
39. Roze S, Buompiersiere MI, Ozdemir Z, de Portu S, Cohen O. Cost-effectiveness of a novel hybrid closed-loop system compared with continuous subcutaneous insulin infusion in people with type 1 diabetes in the UK. *J Med Econ*. 2021;24(1):883–90.
40. Roze S, Isitt JJ, Smith-Palmer J, Lynch P, Klinkenbijn B, Zammit G, et al. Long-Term Cost-Effectiveness the Dexcom G6 Real-Time Continuous Glucose Monitoring System Compared with Self-Monitoring of Blood Glucose in People with Type 1 Diabetes in France. *Diabetes Ther*. 2021 Jan 1;12(1):235–46.
41. Serné EH, Roze S, Buompiersiere MI, Valentine WJ, De Portu S, de Valk HW. Cost-Effectiveness of Hybrid Closed Loop Insulin Pumps Versus Multiple Daily Injections Plus Intermittently Scanned Glucose Monitoring in People With Type 1 Diabetes in The Netherlands. *Adv Ther*. 2022 Apr 1;39(4):1844–56.
42. Zhao X, Ming J, Qu S, Li HJ, Wu J, Ji L, et al. Cost-Effectiveness of Flash Glucose Monitoring for the Management of Patients with Type 1 and Patients with Type 2 Diabetes in China. *Diabetes Ther*. 2021 Dec 1;12(12):3079–92.
43. Charleer S, De Block C, Van Huffel L, Broos B, Fieuws S, Nobels F, et al. Quality of Life and Glucose Control After 1 Year of Nationwide Reimbursement of Intermittently Scanned Continuous Glucose Monitoring in Adults Living With Type 1 Diabetes (FUTURE): A Prospective Observational Real-World Cohort Study. *Diabetes Care*. 2020 Feb 1;43(2):389–97.
44. García-Lorenzo B, Rivero-Santana A, Vallejo-Torres L, Castilla-Rodríguez I, García-Pérez S, García-Pérez L, et al. Cost-effectiveness analysis of real-time continuous monitoring glucose compared to self-monitoring of blood glucose for diabetes mellitus in Spain. *J Eval Clin Pract*. 2018 Aug 1;24(4):772–81.
45. Sullivan PW, Ghushchyan V. Preference-Based EQ-5D index scores for chronic conditions in the United States. *Med Decis Making*. 2006 Jul;26(4):410–20.
46. Continuous Monitoring of Glucose for Type 1 Diabetes: A Health Technology Assessment. *Ont Health Technol Assess Ser*. 2018 Feb 21;18(2):1-160. eCollection 2018.
47. McQueen RB, Ellis SL, Campbell JD, Nair K V., Sullivan PW. Cost-effectiveness of continuous glucose monitoring and intensive insulin therapy for type 1 diabetes. *Cost Eff Resour Alloc*. 2011 Sep 14;9.
48. Palmer AJ, Roze S, Valentine WJ, Minshall ME, Foos V, Lurati FM, et al. The CORE Diabetes Model: Projecting long-term clinical outcomes, costs and cost-effectiveness of interventions in diabetes mellitus (types 1 and 2) to support clinical and reimbursement decision-making. *Curr Med Res Opin*. 2004 Aug;20 Suppl 1(SUPPL. 1).
49. Pease A, Zomer E, Liew D, Earnest A, Soldatos G, Ademi Z, et al. Cost-Effectiveness Analysis of a Hybrid Closed-Loop System Versus Multiple Daily Injections and Capillary Glucose Testing for Adults with Type 1 Diabetes. *Diabetes Technol Ther*. 2020 Nov 1;22(11):812–21.
50. Colagiuri R, National Diabetes Services Scheme (Australia), Eli Lilly Australia., Diabetes Australia. *DiabCoSt Australia : Type 1: assessing the burden of type 1 diabetes in Australia /*. Canberra : Diabetes Australia,; 2009. 28 p.
51. Pease A, Callander E, Zomer E, Abraham MB, Davis EA, Jones TW, et al. The Cost of Control: Cost-effectiveness Analysis of Hybrid Closed-Loop Therapy in Youth. *Diabetes Care*. 2022 Sep 1;45(9):1971–80.
52. Rotondi MA, Wong O, Riddell M, Perkins B. Population-Level Impact and Cost-effectiveness of Continuous Glucose Monitoring and Intermittently Scanned Continuous Glucose Monitoring Technologies for Adults With Type 1 Diabetes in Canada: A Modeling Study. *Diabetes Care*. 2022 Sep 1;45(9):2012–9.
53. Pettus JH, Zhou FL, Shepherd L, Preblich R, Hunt PR, Paranjape S, et al. Incidences of Severe Hypoglycemia and Diabetic Ketoacidosis and Prevalence of Microvascular Complications Stratified by Age and Glycemic Control in U.S. Adult Patients With Type 1 Diabetes: A Real-World Study. *Diabetes Care*. 2019 Dec 1;42(12):2220–7.
