# Supplementary material for: Evaluating the Cost-Utility of Continuous Glucose Monitoring in Individuals with Type 1 Diabetes: A Systematic Review of the Methods and Quality of Studies Using Decision Models or Empirical Data
Source: PubMed Central journal article supplement — Pharmacoeconomics. 2024 Jun 21;42(9):929–53. doi: 10.1007/s40273-024-01388-6 (PMC11343921; doi:10.1007/s40273-024-01388-6), 2024-06-21
Supplement: 40273_2024_1388_MOESM13_ESM.pdf [file 40273_2024_1388_MOESM13_ESM.pdf]

## Supplementary Information – Online Resource 13

Evaluating cost-utility of continuous glucose monitoring in individuals with type 1 diabetes: a systematic review of methods and quality of studies using decision models and/or empirical data.

de Jong LA<sup>1\*</sup> (ORCID ID: 0000-0001-8814-0670), Li X<sup>2</sup> (ORCID ID: 0000-0002-0225-6937), Emamipour S<sup>3</sup>, van der Werf S<sup>4</sup> (ORCID ID: 0000-0001-5856-7657), Postma MJ<sup>1,5</sup>, van Dijk PR<sup>6</sup> (ORCID ID: 0000-0002-9702-6551), Feenstra TL<sup>2</sup> (ORCID ID: 0000-0002-5788-0454)

<sup>1</sup> Department of Health Sciences, University Medical Center Groningen, University of Groningen, Groningen, the Netherlands

<sup>2</sup> Unit of Pharmacotherapy, -Epidemiology & -Economics, University of Groningen, Groningen Research Institute of Pharmacy (GRIP), Groningen, the Netherlands

<sup>3</sup> Department of Clinical Pharmacy and Pharmacology, University Medical Center Groningen, University of Groningen, Groningen, the Netherlands

<sup>4</sup> Central Medical Library, University Medical Center Groningen, University of Groningen, Groningen, the Netherlands

<sup>5</sup> Department of Economics, Econometrics and Finance, Faculty of Economics & Business, University of Groningen, Groningen, the Netherlands

<sup>6</sup> Department of Endocrinology. University Medical Center Groningen, University of Groningen, Groningen, The Netherlands

\*Corresponding author: [t.l.feenstra@rug.nl](mailto:t.l.feenstra@rug.nl)

**Table 1. Overview of scores for Philips checklist per item, studies 1-16 (CORE model studies)**

|    | Roze (2015) [1] | Roze (2016) [2] | Roze (2016) [3] | Roze (2017) [4] | Roze (2019) [5] | Roze (2019) [6] | Roze (2020) [7] | Roze (2021) [8] | Roze (2021) [9] | Roze (2021) [10] | Jendle (2017) [11] | Jendle (2019) [12] | Jendle (2021) [13] | Kamble (2012) [14] | Gomez (2016) [15] | Riemsma (2016) [16] |
|----|-----------------|-----------------|-----------------|-----------------|-----------------|-----------------|-----------------|-----------------|-----------------|------------------|--------------------|--------------------|--------------------|--------------------|-------------------|---------------------|
| 1  | YES             | NO              | YES              | YES                | YES                | YES                | YES                | YES               | YES                 |
| 2  | YES             | NA              | YES              | YES                | YES                | YES                | YES                | YES               | YES                 |
| 3  | NO              | NO              | NO              | NO              | NO              | NO              | YES             | NO              | YES             | NO               | NO                 | NO                 | NO                 | NO                 | NO                | YES                 |
| 4  | YES              | YES                | YES                | YES                | YES                | YES               | YES                 |
| 5  | NO              | YES             | YES             | NO              | YES             | YES             | YES             | YES             | YES             | YES              | NO                 | NO                 | YES                | YES                | YES               | YES                 |
| 6  | YES             | YES             | YES             | YES             | Y/N             | Y/N             | YES             | YES             | YES             | YES              | YES                | YES                | YES                | YES                | YES               | YES                 |
| 7  | YES              | YES                | YES                | YES                | YES                | YES               | YES                 |
| 8  | YES              | YES                | YES                | YES                | YES                | YES               | YES                 |
| 9  | YES              | YES                | YES                | YES                | YES                | YES               | YES                 |
| 10 | NO               | NO                 | NO                 | NR                 | NR                 | NR                | NR                  |
| 11 | YES              | YES                | YES                | YES                | YES                | YES               | YES                 |
| 12 | YES              | YES                | YES                | YES                | YES                | YES               | YES                 |
| 13 | YES              | YES                | YES                | YES                | YES                | YES               | YES                 |
| 14 | NO               | NO                 | NO                 | YES                | YES                | YES               | YES                 |
| 15 | YES              | YES                | YES                | YES                | YES                | YES               | YES                 |
| 16 | NO              | NO              | NO              | NO              | NO              | NO              | Y/N             | NO              | NO              | NO               | NO                 | NO                 | NO                 | NO                 | NO                | YES                 |
| 17 | NO               | NO                 | NO                 | NO                 | NO                 | NO                | NA                  |
| 18 | YES              | YES                | YES                | YES                | YES                | YES               | YES                 |
| 19 | YES              | YES                | YES                | YES                | YES                | YES               | YES                 |
| 20 | NO               | NO                 | NO                 | NO                 | NO                 | NO                | NO                  |
| 21 | YES              | YES                | YES                | YES                | YES                | YES               | YES                 |
| 22 | YES              | YES                | YES                | YES                | YES                | YES               | YES                 |
| 23 | YES              | YES                | YES                | YES                | YES                | YES               | YES                 |
| 24 | NO               | NO                 | NO                 | NR                 | NR                 | NR                | YES                 |
| 25 | NO               | NO                 | NO                 | NR                 | NR                 | NR                | YES                 |
| 26 | NR               | NR                 | NR                 | YES                | YES                | YES               | YES                 |
| 27 | NR               | NR                 | NR                 | NR                 | NR                 | NR                | YES                 |
| 28 | NR               | NR                 | NR                 | NR                 | NR                 | NR                | NR                  |
| 29 | NA               | NA                 | NA                 | NR                 | NR                 | NR                | YES                 |
| 30 | NR               | NR                 | NR                 | NR                 | NR                 | NR                | NR                  |
| 31 | YES              | YES                | YES                | YES                | YES                | NO                | YES                 |
| 32 | NR               | NR                 | NR                 | YES                | YES                | YES               | YES                 |

|    |     |     |     |     |     |     |     |     |     |     |     |     |     |     |     |     |    |
|----|-----|-----|-----|-----|-----|-----|-----|-----|-----|-----|-----|-----|-----|-----|-----|-----|----|
| 33 | NO  | NR  | NR  | NR  | NR |
| 34 | YES | YES | YES | YES | YES | YES | NA  | NA  | NA  | NA  | YES | NA  | NR  | NR  | NR  | YES |    |
| 35 | NO  | NR  | NR  | NR  | YES |    |
| 36 | NO  | NR  | NR  | NR  | YES |    |
| 37 | NO  | YES |    |
| 38 | YES |    |
| 39 | NR  |    |
| 40 | YES | YES | NO  | YES | YES | YES | NO  | YES | NO  | YES | NO  | NO  | YES | YES | YES | YES |    |
| 41 | NR  | YES |    |
| 42 | NO  | YES | YES | YES | YES |    |
| 43 | NO  | NA  | NA  | NA  | NA  | NA  | NO  | NO  | NA  | NA  | NA  | NA  | NR  | NR  | YES | YES |    |
| 44 | YES | NA  | NA  | NA  | NO  | NA  | YES | YES | NA  | YES |    |
| 45 | YES | NO  | YES | NO  | NO  | NO  | NO  | NO  | YES | NO  | NO  | YES | NO  | NO  | NO  | YES |    |
| 46 | NA  | NO  | NA  | NO  | NO  | NO  | NO  | NO  | NA  | NO  | NO  | NA  | NO  | NO  | NO  | NA  |    |
| 47 | YES | NO  | NO  | NO  | YES |    |
| 48 | YES | NO  | YES | NO  | NO  | NO  | NO  | NO  | YES | NO  | NO  | YES | YES | YES | NO  | YES |    |
| 49 | YES | NO  | YES | NO  | YES | YES | YES | YES | NO  | YES |    |
| 50 | YES |    |
| 51 | YES | NO  | NO  | NO  | NO  | NO  | YES | YES | NO  | NO  | NO  | NO  | NO  | NO  | YES | YES |    |
| 52 | YES |    |
| 53 | NO  | NR  | NR  | NR  | NR  |    |
| 54 | YES |    |
| 55 | NA  | NA  | NO  | NO  | NO  | NO  | NA  | YES | YES | YES |    |
| 56 | YES | NR  | NR  | NR  | NR  |    |
| 57 | YES | NO  | YES | YES | YES |    |

Abbreviations: NA, not applicable; NR, not reported; Y/N, yes/no.



|    |     |     |     |     |     |     |     |     |     |        |     |        |        |     |     |     |
|----|-----|-----|-----|-----|-----|-----|-----|-----|-----|--------|-----|--------|--------|-----|-----|-----|
| 32 | YES | YES | NR  | NR  | NR  | NR  | NR  | NR  | YES | NR     | YES | NR     | NR     | YES | NR  | NR  |
| 33 | NR  | NR  | NA  | NO     | NR  | NR     | NA     | NR  | NR  | NO  |
| 34 | NR  | YES | NO  | YES | NO  | YES | NR  | NO  | NA  | NA     | YES | NA     | NA     | NR  | YES | YES |
| 35 | NR  | NR  | NR  | NO  | NO  | NO  | NO  | NO  | YES | NO     | YES | YES    | YES    | YES | NO  | NO  |
| 36 | NR  | NR  | NR  | NR  | NO  | NR  | NR  | NR  | YES | NO     | YES | NA     | NA     | YES | NO  | NO  |
| 37 | YES | NO  | YES | YES/NO | YES | YES    | YES    | YES | YES | YES |
| 38 | YES    | YES | YES    | YES    | YES | YES | YES |
| 39 | NR  | NR  | NR  | NR  | NR  | YES | NR  | NR  | NR  | NR     | NR  | NA     | NA     | NR  | YES | NR  |
| 40 | YES | YES | NO  | YES | YES | YES | NO  | NO  | YES | YES    | YES | YES    | YES    | YES | YES | YES |
| 41 | NR     | YES | NA     | NA     | NR  | NA  | NR  |
| 42 | YES | YES | NO  | NO  | YES | NO  | NO  | NO  | NO  | NO     | YES | YES/NO | NO     | YES | YES | NO  |
| 43 | YES | NR  | NO  | NO  | NO  | NA  | NA  | NA  | YES | YES    | YES | YES    | YES    | NR  | YES | NA  |
| 44 | NA  | NA  | YES | NO  | NO  | NA  | NA  | NA  | YES | YES    | YES | YES    | YES    | NA  | YES | NA  |
| 45 | YES | NO     | NO  | NO     | NO     | NO  | NO  | NO  |
| 46 | NA  | NO     | NO  | NO     | NO     | NO  | NO  | NO  |
| 47 | YES | NO  | NO  | NO     | YES | YES    | YES    | NO  | YES | YES |
| 48 | YES | YES | NO     | YES | YES/NO | YES/NO | YES | NO  | NO  |
| 49 | YES | NO  | YES | NO     | NO  | YES/NO | YES/NO | YES | YES | NO  |
| 50 | YES    | YES | YES    | YES    | YES | YES | YES |
| 51 | YES | NO  | YES | YES | YES | NO  | NO  | NO  | YES | YES    | YES | YES    | YES    | NO  | YES | NO  |
| 52 | YES | YES | NO  | NO  | NO  | NO  | NO  | NA  | YES | YES    | YES | YES    | YES    | YES | YES | YES |
| 53 | NR  | NR  | YES | NO     | NO  | NO     | NO     | NR  | NR  | NO  |
| 54 | YES | NO  | YES    | YES | YES    | YES    | YES | YES | YES |
| 55 | YES | NA  | YES | NO  | YES | NA  | NA  | NA  | NO  | YES    | NA  | NA     | NA     | NA  | NA  | NA  |
| 56 | NR  | NR  | YES | YES | YES | YES | YES | YES | NA  | NO     | NA  | NA     | NA     | NR  | NO  | NO  |
| 57 | YES | NO  | YES    | YES | NO     | YES    | NO  | NO  | YES |

Abbreviations: NA, not applicable; NR, not reported; Y/N, yes/no.

**Table 3. Total quality scores per item**

| Item no | YES | NO | Y/N | NR | NA | QUALITY SCORE |
|---------|-----|----|-----|----|----|---------------|
| 1       | 23  | 9  | 0   | 0  | 0  | 71.9          |
| 2       | 23  | 0  | 0   | 0  | 9  | 100.0         |
| 3       | 6   | 26 | 0   | 0  | 0  | 18.8          |
| 4       | 32  | 0  | 0   | 0  | 0  | 100.0         |
| 5       | 24  | 8  | 0   | 0  | 0  | 75.0          |
| 6       | 29  | 1  | 2   | 0  | 0  | 93.8          |
| 7       | 32  | 0  | 0   | 0  | 0  | 100.0         |
| 8       | 30  | 2  | 0   | 0  | 0  | 93.8          |
| 9       | 31  | 0  | 0   | 1  | 0  | 96.9          |
| 10      | 2   | 0  | 0   | 30 | 0  | 6.3           |
| 11      | 29  | 2  | 1   | 0  | 0  | 92.2          |
| 12      | 27  | 3  | 2   | 0  | 0  | 87.5          |
| 13      | 29  | 1  | 2   | 0  | 0  | 93.8          |
| 14      | 3   | 5  | 24  | 0  | 0  | 46.9          |
| 15      | 30  | 2  | 0   | 0  | 0  | 93.8          |
| 16      | 6   | 20 | 6   | 0  | 0  | 28.1          |
| 17      | 2   | 24 | 0   | 0  | 6  | 7.7           |
| 18      | 32  | 0  | 0   | 0  | 0  | 100.0         |
| 19      | 30  | 1  | 1   | 0  | 0  | 95.3          |
| 20      | 3   | 29 | 0   | 0  | 0  | 9.4           |
| 21      | 31  | 1  | 0   | 0  | 0  | 96.9          |
| 22      | 28  | 4  | 0   | 0  | 0  | 87.5          |
| 23      | 31  | 1  | 0   | 0  | 0  | 96.9          |
| 24      | 4   | 24 | 4   | 0  | 0  | 18.8          |
| 25      | 6   | 0  | 0   | 26 | 0  | 18.8          |
| 26      | 5   | 0  | 3   | 24 | 0  | 20.3          |
| 27      | 3   | 28 | 1   | 0  | 0  | 10.9          |
| 28      | 0   | 0  | 1   | 31 | 0  | 1.6           |
| 29      | 3   | 6  | 0   | 0  | 23 | 33.3          |
| 30      | 5   | 0  | 0   | 27 | 0  | 15.6          |
| 31      | 29  | 3  | 0   | 0  | 0  | 90.6          |
| 32      | 2   | 0  | 0   | 30 | 0  | 6.3           |
| 33      | 0   | 0  | 0   | 32 | 0  | 0.0           |
| 34      | 14  | 0  | 0   | 1  | 17 | 93.3          |
| 35      | 6   | 26 | 0   | 0  | 0  | 18.8          |
| 36      | 4   | 26 | 2   | 0  | 0  | 15.6          |
| 37      | 29  | 1  | 1   | 1  | 0  | 92.2          |
| 38      | 30  | 0  | 1   | 1  | 0  | 95.3          |
| 39      | 5   | 27 | 0   | 0  | 0  | 15.6          |
| 40      | 24  | 8  | 0   | 0  | 0  | 75.0          |
| 41      | 2   | 0  | 0   | 30 | 0  | 6.3           |

|           |    |    |   |   |    |              |
|-----------|----|----|---|---|----|--------------|
| <b>42</b> | 4  | 27 | 1 | 0 | 0  | <b>14.1</b>  |
| <b>43</b> | 9  | 10 | 0 | 0 | 13 | <b>47.4</b>  |
| <b>44</b> | 11 | 3  | 0 | 0 | 18 | <b>78.6</b>  |
| <b>45</b> | 2  | 24 | 6 | 0 | 0  | <b>15.6</b>  |
| <b>46</b> | 0  | 24 | 0 | 0 | 8  | <b>0.0</b>   |
| <b>47</b> | 24 | 7  | 1 | 0 | 0  | <b>76.6</b>  |
| <b>48</b> | 10 | 19 | 3 | 0 | 0  | <b>35.9</b>  |
| <b>49</b> | 17 | 13 | 2 | 0 | 0  | <b>56.3</b>  |
| <b>50</b> | 32 | 0  | 0 | 0 | 0  | <b>100.0</b> |
| <b>51</b> | 14 | 17 | 1 | 0 | 0  | <b>45.3</b>  |
| <b>52</b> | 31 | 0  | 0 | 0 | 1  | <b>100.0</b> |
| <b>53</b> | 1  | 31 | 0 | 0 | 0  | <b>3.1</b>   |
| <b>54</b> | 31 | 1  | 0 | 0 | 0  | <b>96.9</b>  |
| <b>55</b> | 8  | 6  | 0 | 0 | 18 | <b>57.1</b>  |
| <b>56</b> | 24 | 0  | 0 | 0 | 8  | <b>100.0</b> |
| <b>57</b> | 26 | 6  | 0 | 0 | 0  | <b>81.3</b>  |

Abbreviations: NA, not applicable; NR, not reported; Y/N, yes/no.

**Table 4. Total quality scores per study.**

|           | Yes | Y/N | NO | NR | NA |              |
|-----------|-----|-----|----|----|----|--------------|
| <b>1</b>  | 29  | 4   | 14 | 8  | 2  | <b>56.36</b> |
| <b>2</b>  | 27  | 1   | 16 | 8  | 5  | <b>52.88</b> |
| <b>3</b>  | 28  | 3   | 14 | 8  | 4  | <b>55.66</b> |
| <b>4</b>  | 28  | 1   | 17 | 8  | 3  | <b>52.78</b> |
| <b>5</b>  | 28  | 2   | 17 | 8  | 2  | <b>52.73</b> |
| <b>6</b>  | 28  | 2   | 16 | 8  | 3  | <b>53.70</b> |
| <b>7</b>  | 23  | 2   | 19 | 9  | 4  | <b>45.28</b> |
| <b>8</b>  | 29  | 1   | 16 | 8  | 3  | <b>54.63</b> |
| <b>9</b>  | 29  | 2   | 12 | 8  | 6  | <b>58.82</b> |
| <b>10</b> | 27  | 1   | 16 | 8  | 5  | <b>52.88</b> |
| <b>11</b> | 27  | 1   | 17 | 8  | 4  | <b>51.89</b> |
| <b>12</b> | 27  | 2   | 14 | 8  | 6  | <b>54.90</b> |
| <b>13</b> | 27  | 1   | 17 | 8  | 4  | <b>51.89</b> |
| <b>14</b> | 29  | 2   | 15 | 8  | 3  | <b>55.56</b> |
| <b>15</b> | 28  | 1   | 17 | 8  | 3  | <b>52.78</b> |
| <b>16</b> | 47  | 2   | 2  | 4  | 2  | <b>87.27</b> |
| <b>17</b> | 33  | 1   | 11 | 8  | 4  | <b>63.21</b> |
| <b>18</b> | 26  | 2   | 17 | 8  | 4  | <b>50.94</b> |
| <b>19</b> | 27  | 1   | 19 | 8  | 2  | <b>50.00</b> |
| <b>20</b> | 28  | 1   | 19 | 8  | 1  | <b>50.89</b> |
| <b>21</b> | 30  | 1   | 16 | 7  | 3  | <b>56.48</b> |
| <b>22</b> | 28  | 1   | 14 | 8  | 6  | <b>55.88</b> |
| <b>23</b> | 23  | 1   | 19 | 9  | 5  | <b>45.19</b> |
| <b>24</b> | 19  | 1   | 20 | 10 | 7  | <b>39.00</b> |
| <b>25</b> | 39  | 0   | 11 | 3  | 4  | <b>73.58</b> |
| <b>26</b> | 25  | 2   | 21 | 7  | 2  | <b>47.27</b> |
| <b>27</b> | 45  | 0   | 7  | 3  | 2  | <b>81.82</b> |
| <b>28</b> | 25  | 10  | 9  | 7  | 6  | <b>58.82</b> |
| <b>29</b> | 31  | 12  | 4  | 5  | 5  | <b>71.15</b> |
| <b>30</b> | 29  | 2   | 15 | 7  | 4  | <b>56.60</b> |
| <b>31</b> | 37  | 1   | 11 | 5  | 3  | <b>69.44</b> |
| <b>32</b> | 22  | 1   | 24 | 6  | 4  | <b>42.45</b> |

Abbreviations: NA, not applicable; NR, not reported; Y/N, yes/no.



Model quality: Philips, scores per paper

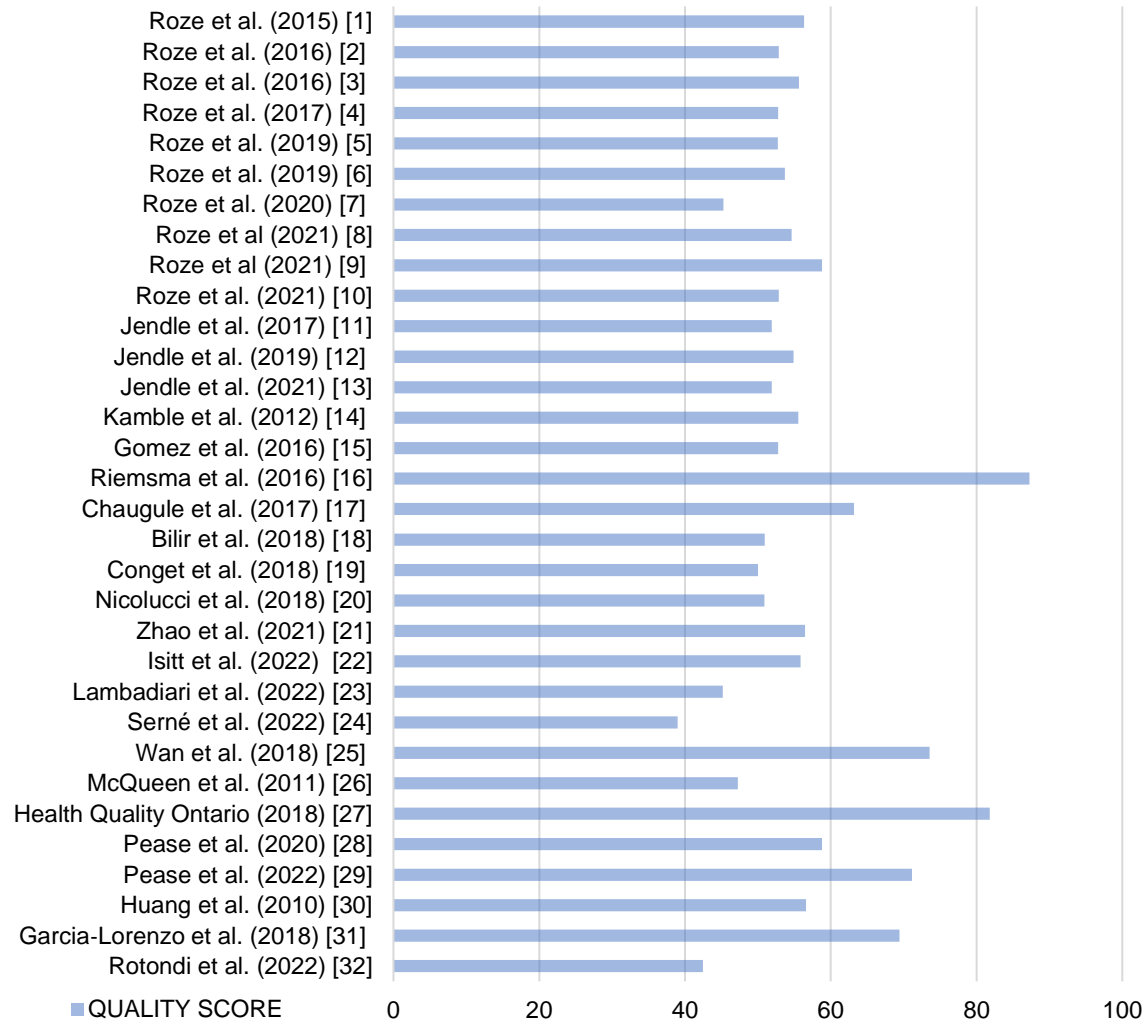

Figure 1. Total quality scores per study.

## References

1. Roze S, Saunders R, Brandt AS, de Portu S, Papo NL, Jendle J. Health-economic analysis of real-time continuous glucose monitoring in people with Type 1 diabetes. *Diabet Med.* 2015;32:618–26.
2. Roze S, Smith-Palmer J, Valentine W, Payet V, De Portu S, Papo N, et al. Cost-Effectiveness of Sensor-Augmented Pump Therapy with Low Glucose Suspend Versus Standard Insulin Pump Therapy in Two Different Patient Populations with Type 1 Diabetes in France. *Diabetes Technol Ther.* 2016;18:75–84.
3. Roze S, Smith-Palmer J, Valentine WJ, Cook M, Jethwa M, De Portu S, et al. Long-term health economic benefits of sensor-augmented pump therapy vs continuous subcutaneous insulin infusion alone in type 1 diabetes: a U.K. perspective. *J Med Econ.* 2016;19:236–42.
4. Roze S, de Portu S, Smith-Palmer J, Delbaere A, Valentine W, Ridderstråle M. Cost-effectiveness of sensor-augmented pump therapy versus standard insulin pump therapy in patients with type 1 diabetes in Denmark. *Diabetes Res Clin Pract.* 2017;128:6–14.
5. Roze S, Smith-Palmer J, De Portu S, Delbaere A, De Brouwer B, De Valk HW. Cost-effectiveness of sensor-augmented insulin pump therapy vs continuous subcutaneous insulin infusion in patients with type 1 diabetes in the Netherlands. *Clinicoecon Outcomes Res.* 2019;11:73–82.
6. Roze S, Smith-Palmer J, De Portu S, Özdemir Saltik AZ, Akgül T, Deyneli O. Cost-Effectiveness of Sensor-Augmented Insulin Pump Therapy Versus Continuous Insulin Infusion in Patients with Type 1 Diabetes in Turkey. *Diabetes Technol Ther.* 2019;21:727–35.
7. Roze S, Isitt J, Smith-Palmer J, Javanbakht M, Lynch P. Long-term Cost-Effectiveness of Dexcom G6 Real-time Continuous Glucose Monitoring Versus Self-Monitoring of Blood Glucose in Patients With Type 1 Diabetes in the U.K. *Diabetes Care.* 2020;43:2411–7.
8. Roze S, Isitt JJ, Smith-Palmer J, Lynch P. Evaluation of the Long-Term Cost-Effectiveness of the Dexcom G6 Continuous Glucose Monitor versus Self-Monitoring of Blood Glucose in People with Type 1 Diabetes in Canada. *Clinicoecon Outcomes Res.* 2021;13:717–25.
9. Roze S, Buompiensiere MI, Ozdemir Z, de Portu S, Cohen O. Cost-effectiveness of a novel hybrid closed-loop system compared with continuous subcutaneous insulin infusion in people with type 1 diabetes in the UK. *J Med Econ.* 2021;24:883–90.
10. Roze S, Isitt JJ, Smith-Palmer J, Lynch P, Klinkenbijn B, Zammit G, et al. Long-Term Cost-Effectiveness the Dexcom G6 Real-Time Continuous Glucose Monitoring System Compared with Self-Monitoring of Blood Glucose in People with Type 1 Diabetes in France. *Diabetes Ther.* 2021;12:235–46.
11. Jendle J, Smith-Palmer J, Delbaere A, de Portu S, Papo N, Valentine W, et al. Cost-Effectiveness Analysis of Sensor-Augmented Insulin Pump Therapy with Automated Insulin Suspension Versus Standard Insulin Pump Therapy in Patients with Type 1 Diabetes in Sweden. *Diabetes Ther.* 2017;8:1015–30.
12. Jendle J, Pöhlmann J, De Portu S, Smith-Palmer J, Roze S. Cost-Effectiveness Analysis of the MiniMed 670G Hybrid Closed-Loop System Versus Continuous Subcutaneous Insulin Infusion for Treatment of Type 1 Diabetes. *Diabetes Technol Ther.* 2019;21:110–8.
13. Jendle J, Buompiensiere MI, Holm AL, de Portu S, Malkin SJP, Cohen O. The Cost-Effectiveness of an Advanced Hybrid Closed-Loop System in People with Type 1 Diabetes: a Health Economic Analysis in Sweden. *Diabetes Ther.* 2021;12:2977–91.
14. Kamble S, Schulman KA, Reed SD. Cost-effectiveness of sensor-augmented pump therapy in adults with type 1 diabetes in the United States. *Value Health.* 2012;15:632–8.
15. Gomez AM, Alfonso-Cristancho R, Orozco JJ, Lynch PM, Prieto D, Saunders R, et al. Clinical and economic benefits of integrated pump/CGM technology therapy in patients with type 1 diabetes in Colombia. *Endocrinol Nutr.* 2016;63:466–74.

16. Riemsma R, Ramos IC, Birnie R, Büyükkaramikli N, Armstrong N, Ryder S, et al. Integrated sensor-augmented pump therapy systems [the MiniMed® Paradigm™ Veo system and the Vibe™ and G4® PLATINUM CGM (continuous glucose monitoring) system] for managing blood glucose levels in type 1 diabetes: a systematic review and economic evaluation. *Health Technol Assess*. 2016;20:1–252.
17. Chaugule S, Graham C. Cost-effectiveness of G5 Mobile continuous glucose monitoring device compared to self-monitoring of blood glucose alone for people with type 1 diabetes from the Canadian societal perspective. *J Med Econ*. 2017;20:1128–35.
18. Bilir SP, Hellmund R, Wehler B, Li H, Munakata J, Lamotte M. Cost-effectiveness Analysis of a Flash Glucose Monitoring System for Patients with Type 1 Diabetes Receiving Intensive Insulin Treatment in Sweden. *Eur Endocrinol*. 2018;14:73–9.
19. Conget I, Martín-Vaquero P, Roze S, Elías I, Pineda C, Álvarez M, et al. Cost-effectiveness analysis of sensor-augmented pump therapy with low glucose-suspend in patients with type 1 diabetes mellitus and high risk of hypoglycemia in Spain. *Endocrinol Diabetes Nutr*. 2018;65:380–6.
20. Nicolucci A, Rossi MC, D’Ostilio D, Delbaere A, de Portu S, Roze S. Cost-effectiveness of sensor-augmented pump therapy in two different patient populations with type 1 diabetes in Italy. *Nutr Metab Cardiovasc Dis*. 2018;28:707–15.
21. Zhao X, Ming J, Qu S, Li HJ, Wu J, Ji L, et al. Cost-Effectiveness of Flash Glucose Monitoring for the Management of Patients with Type 1 and Patients with Type 2 Diabetes in China. *Diabetes Ther*. 2021;12:3079–92.
22. Isitt JJ, Roze S. Long-term cost-effectiveness of Dexcom G6 real-time continuous glucose monitoring system in people with type 1 diabetes in Australia: Response to letter from Hellmund, Richard and Welsh, Zoe. *Diabet Med*. 2023;40.
23. Lambadiari V, Ozdemir Saltik AZ, De Portu S, Buompiensiere MI, Kountouri A, Korakas E, et al. Cost-Effectiveness Analysis of an Advanced Hybrid Closed-Loop Insulin Delivery System in People with Type 1 Diabetes in Greece. *Diabetes Technol Ther*. 2022;24:316–23.
24. Serné EH, Roze S, Buompiensiere MI, Valentine WJ, De Portu S, de Valk HW. Cost-Effectiveness of Hybrid Closed Loop Insulin Pumps Versus Multiple Daily Injections Plus Intermittently Scanned Glucose Monitoring in People With Type 1 Diabetes in The Netherlands. *Adv Ther*. 2022;39:1844–56.
25. Wan W, Skandari MR, Minc A, Nathan AG, Winn A, Zarei P, et al. Cost-effectiveness of Continuous Glucose Monitoring for Adults With Type 1 Diabetes Compared With Self-Monitoring of Blood Glucose: The DIAMOND Randomized Trial. *Diabetes Care*. 2018;41:1227–34.
26. McQueen RB, Ellis SL, Campbell JD, Nair K V., Sullivan PW. Cost-effectiveness of continuous glucose monitoring and intensive insulin therapy for type 1 diabetes. *Cost Eff Resour Alloc*. 2011;9.
27. Continuous Monitoring of Glucose for Type 1 Diabetes: A Health Technology Assessment. *Ont Health Technol Assess Ser*. 2018 Feb 21;18(2):1-160. eCollection 2018.
28. Pease A, Zomer E, Liew D, Earnest A, Soldatos G, Ademi Z, et al. Cost-Effectiveness Analysis of a Hybrid Closed-Loop System Versus Multiple Daily Injections and Capillary Glucose Testing for Adults with Type 1 Diabetes. *Diabetes Technol Ther*. 2020;22:812–21.
29. Pease A, Callander E, Zomer E, Abraham MB, Davis EA, Jones TW, et al. The Cost of Control: Cost-effectiveness Analysis of Hybrid Closed-Loop Therapy in Youth. *Diabetes Care*. 2022;45:1971–80.
30. Huang ES, O’Grady M, Basu A, Winn A, John P, Lee J, et al. The cost-effectiveness of continuous glucose monitoring in type 1 diabetes. *Diabetes Care*. 2010;33:1269–74.
31. García-Lorenzo B, Rivero-Santana A, Vallejo-Torres L, Castilla-Rodríguez I, García-Pérez S, García-Pérez L, et al. Cost-effectiveness analysis of real-time continuous monitoring glucose compared to self-monitoring of blood glucose for diabetes mellitus in Spain. *J Eval Clin Pract*. 2018;24:772–81.
32. Rotondi MA, Wong O, Riddell M, Perkins B. Population-Level Impact and Cost-effectiveness of Continuous Glucose Monitoring and Intermittently Scanned Continuous Glucose Monitoring Technologies for Adults With Type 1 Diabetes in Canada: A Modeling Study. *Diabetes Care*. 2022;45:2012–9.
