# Supplementary material for: Evaluating the Cost-Utility of Continuous Glucose Monitoring in Individuals with Type 1 Diabetes: A Systematic Review of the Methods and Quality of Studies Using Decision Models or Empirical Data
Source: PubMed Central journal article supplement — Pharmacoeconomics. 2024 Jun 21;42(9):929–53. doi: 10.1007/s40273-024-01388-6 (PMC11343921; doi:10.1007/s40273-024-01388-6), 2024-06-21
Supplement: 40273_2024_1388_MOESM14_ESM.pdf [file 40273_2024_1388_MOESM14_ESM.pdf]

## Supplementary Information – Online Resource 14

Evaluating cost-utility of continuous glucose monitoring in individuals with type 1 diabetes: a systematic review of methods and quality of studies using decision models and/or empirical data.

de Jong LA<sup>1\*</sup> (ORCID ID: 0000-0001-8814-0670), Li X<sup>2</sup> (ORCID ID: 0000-0002-0225-6937), Emamipour S<sup>3</sup>, van der Werf S<sup>4</sup> (ORCID ID: 0000-0001-5856-7657), Postma MJ<sup>4,5</sup>, van Dijk PR<sup>6</sup> (ORCID ID: 0000-0002-9702-6551), Feenstra TL<sup>2</sup> (ORCID ID: 0000-0002-5788-0454)

<sup>1</sup> Department of Health Sciences, University Medical Center Groningen, University of Groningen, Groningen, the Netherlands

<sup>2</sup> Unit of Pharmacotherapy, -Epidemiology & -Economics, University of Groningen, Groningen Research Institute of Pharmacy (GRIP), Groningen, the Netherlands

<sup>3</sup> Department of Clinical Pharmacy and Pharmacology, University Medical Center Groningen, University of Groningen, Groningen, the Netherlands

<sup>4</sup> Central Medical Library, University Medical Center Groningen, University of Groningen, Groningen, the Netherlands

<sup>5</sup> Department of Economics, Econometrics and Finance, Faculty of Economics & Business, University of Groningen, Groningen, the Netherlands

<sup>6</sup> Department of Endocrinology. University Medical Center Groningen, University of Groningen, Groningen, The Netherlands

\*Corresponding author: [t.l.feenstra@rug.nl](mailto:t.l.feenstra@rug.nl)

**Table 1. Quality assessment of empirical-data-based studies using the CHEC-checklist**

|                                                                                                                     | Emamipour<br>2022, The<br>Netherlands<br>[1] | Ly 2014,<br>Australia<br>[2] |
|---------------------------------------------------------------------------------------------------------------------|----------------------------------------------|------------------------------|
| 1. Is the study population clearly described?                                                                       | YES                                          | YES                          |
| 2. Are competing alternatives clearly described?                                                                    | NO                                           | NO                           |
| 3. Is a well-defined research question posed in answerable form?                                                    | YES                                          | YES                          |
| 4. Is the economic study design appropriate to the stated objective?                                                | YES                                          | YES                          |
| 5. Is the chosen time horizon appropriate in order to include relevant costs and consequences?                      | NO                                           | NO                           |
| 6. Is the actual perspective chosen appropriate?                                                                    | YES                                          | YES                          |
| 7. Are all important and relevant costs for each alternative identified?                                            | YES                                          | YES                          |
| 8. Are all costs measured appropriately in physical units?                                                          | YES                                          | YES                          |
| 9. Are costs valued appropriately?                                                                                  | YES                                          | YES                          |
| 10. Are all important and relevant outcomes for each alternative identified?                                        | YES                                          | YES                          |
| 11. Are all outcomes measured appropriately?                                                                        | YES                                          | YES                          |
| 12. Are outcomes valued appropriately?                                                                              | YES                                          | YES                          |
| 13. Is an incremental analysis of costs and outcomes of alternatives performed?                                     | NO                                           | YES                          |
| 14. Are all future costs and outcomes discounted appropriately?                                                     | NA                                           | NA                           |
| 15. Are all important variables, whose values are uncertain, appropriately subjected to sensitivity analysis?       | YES                                          | NO                           |
| 16. Do the conclusions follow from the data reported?                                                               | YES                                          | YES                          |
| 17. Does the study discuss the generalizability of the results to other settings and patient/client groups?         | YES                                          | YES                          |
| 18. Does the article indicate that there is no potential conflict of interest of study researcher(s) and funder(s)? | YES                                          | YES                          |
| 19. Are ethical and distributional issues discussed appropriately?                                                  | YES                                          | NO                           |

Abbreviation: NA, not applicable.

## References

1. Emamipour S, van Dijk PR, Bilo HJG, Edens MA, van der Galiën O, Postma MJ, et al. Personalizing the Use of a Intermittently Scanned Continuous Glucose Monitoring (isCGM) Device in Individuals With Type 1 Diabetes: A Cost-Effectiveness Perspective in the Netherlands (FLARE-NL 9). *J Diabetes Sci Technol*. 2022.
2. Ly TT, Brnabic AJM, Eggleston A, Kolivos A, McBride ME, Schrover R, et al. A cost-effectiveness analysis of sensor-augmented insulin pump therapy and automated insulin suspension versus standard pump therapy for hypoglycemic unaware patients with type 1 diabetes. *Value Health*. 2014;17:561–9.
